# Supplementary material for: Insulin post-transcriptional regulation via PARP12-mediated ADP- ribosylation
Source: Research Square preprint supplement (doi:10.21203/rs.3.rs-6473437/v1), 2025-05-21
Supplement: Supplementary file 1 [file d284a6169eab549fceae1cf4.xlsx]

## Sheet: Table S1
Table1: Relative protein abundance of various PARPs in in vitro beta cell models
Human Isltes treated with CT2 (set1)
Gene name	Log2 fold change	p-value
PARP1	-0.0609789	0.134771
PARP2	-0.0980543	0.0923755
PARP3	0	0
PARP4	-0.00755205	0.830279
PARP9	0.559395	9.43048e-06
PARP10	0.165342	0.00254989
PARP12	0.417223	5.88081e-05
ZC3HAV1	0.242894	0.000317853
PARP14	0.839493	7.67571e-08
PARP16	-0.0535086	0.784597
Human Isltes treated with CT2 (set2)
Gene name	Log2 fold change	p-value
PARP1	-0.0557018	0.26606
PARP2	-0.105291	0.556861
PARP3	0	0
PARP4	-0.0549086	0.238877
PARP9	0.524093	6.74205e-05
PARP10	0.16447	0.00516727
PARP12	0.283445	0.000349163
ZC3HAV1	0.121719	0.00941641
PARP14	0.726517	6.33392e-05
PARP16	-0.086728	0.0866237
EndoC treated with CT2
Gene name	Log2FC	P-value
PARP1	-0.239323	0.00537436
PARP2	-0.55355	0.00935914
PARP3	0	0
PARP4	0.743194	0.00711425
PARP9	1.9536	0.00123175
PARP10	1.11153	0.00384005
PARP12	1.01004	0.0064156
ZC3HAV1	0	0
PARP14	2.01446	0.000507412
PARP16	0	0
EndoC treated with CT3
Gene name	Log2FC	P-value
PARP1	-0.0386082	0.0098306
PARP2	0	0
PARP3	0	0
PARP4	0.322114	0.000369761
PARP9	0.884121	0.000491221
PARP10	0.962971	0.000631123
PARP12	1.05187	0.000458772
ZC3HAV1	0.227583	0.000159367
PARP14	1.36735	0.000719231
PARP16	0	0
MIN6 treated with CT1
Gene names	Log2FC	tTest pvalue
Parp1	-0.713504	0.000252798
Parp2	-0.289455	0.637547
Parp3	8.23327	2.95201e-07
PARP4	0	0
Parp9	7.08473	0.0142134
Parp10	7.90194	0.000795683
Parp12	3.43686	1.5768e-05
Zc3hav1	1.57737	0.539385
Parp14	5.48076	0.00447004
PARP16	0	0

## Sheet: Table S2
Table2: Characteristics of the donors of the HPAP cohort.
Identifier	HPAP	Sex/	Ancestry	BMI	Medical History	Anti-Islet Autoantibody				HbA1c	Cold Ischemia Time (hr)	Total	EBV status
	Identifier	Age				GAD	IA-2	mIAA	ZnT8	(C-Peptide)		Islet Yield (IEQ)	IgG / IgM
Non Diabetic #1	HPAP022	F/39yo	Caucasian	34.7 (Obese)	No HX DIAB	Neg.	Neg.	Neg.	Neg.	4.7 (9.35)	08:33:00	500000	Negative / Negative
Non Diabetic #2	HPAP026	M/24yo	Caucasian	20.6 (Normal)	No HX DIAB	GAD+(Neg.)†	Neg.	Neg.	Neg.	4.9 (0.25)	16:27:00	238452	Positive / Negative
											(DCD WIT 22 mins)
Non Diabetic #3	HPAP027	F/31yo	Caucasian	32.71 (Obese)	No HX DIAB	Neg.	Neg.	Neg.	Neg.	4.4 (9.35)	09:59:00	171986	Negative / Negative
Non Diabetic #4	HPAP034	M/13yo	Caucasian	18.7 (Between 50th-75th Percentile; Normal)	No HX DIAB	Neg.	Neg.	Neg.	Neg.	5.2 (12.7)	11:31:00	284790	Positive / Negative
Non Diabetic #5	HPAP035	M/35yo	Caucasian	26.9 (Overweight)	No HX DIAB	Neg.	Neg.	Neg.	Neg.	5.2 (15.9)	12:55:00	303431	Negative / Negative
Non Diabetic #6	HPAP036	F/23yo	Caucasian	16.0 (Underweight)	No HX DIAB	Neg.	Neg.	Neg.	Neg.	5.2 (1.12)	17:27:00	258650	Positive / Negative
Non Diabetic #7	HPAP037	F/35yo	Caucasian	21.9 (Normal)	No HX DIAB	Neg.	Neg.	Neg.	Neg.	5.3 (4.75)	12:02:00	109866	Positive / Negative
Non Diabetic #8	HPAP039	F/5yo	Caucasian	16.3 (Between 75th-85th percentile; Normal)	No HX DIAB	Neg.	Neg.	Neg.	Neg.	6.8 (1.88)	22:43:00	151858	Negative / Not measured
Non Diabetic #9	HPAP040	M/35yo	Caucasian	23.98 (Normal)	No HX DIAB	Neg.	Neg.	Neg.	Neg.	5.4 (7.01)	11:32:00	596235	Positive / Negative
Non Diabetic #10	HPAP044	F/3yo	Caucasian	12.0 (Below 3rd Percentile; Underweight)	No HX DIAB	Neg.	Neg.	Neg.	Neg.	5.3 (8.16)	16:42:00	74940	Positive / Negative
Non Diabetic #11	HPAP047	M/8yo	Caucasian	16.82 (Between 50th-75th Percentile; Normal)	No HX DIAB	Neg.	Neg.	Neg.	Neg.	Not measured** (1.24)	19:37:00	188394	Negative / Negative
Non Diabetic #12	HPAP056	M/33yo	Caucasian	32.89 (Obese)	No HX DIAB	Neg.	Neg.	Neg.	Neg.	5.6 (1.24)	08:32:00	292676	Positive / Negative
Non Diabetic #13	HPAP082	M/25yo	Caucasian	23.96 (Normal)	No HX DIAB	Neg.	Neg.	Neg.	Neg.	5.6 (2.7)	17:18:00	37042	Positive / Negative
Non Diabetic #14	HPAP099	F/28yo	Hispanic	24.7 (Normal)	No HX DIAB	Neg.	Neg.	Neg.	Neg.	5 (6.62)	06:09:00	504468	Positive / Negative
Non Diabetic #15	HPAP104	M/4yo	Hispanic	20.63 (Normal)	No HX DIAB	Neg.	Neg.	Neg.	Neg.	4.9 (2.22)	11:31:00	412032	Positive / Negative
AAB1+ #1	HPAP024	M/18yo	Caucasian	24.3 (Between 75th-85th percentile; Normal)	No HX DIAB	GAD+	Neg.	Neg.	Neg.	5.5 (5.6)	10:52:00	68040	Positive / Negative
						(203/20)					(DCD WIT 44 mins)
AAB1+ #2	HPAP029	M/23yo	Caucasian	28.6 (Overweight)	No HX DIAB	GAD+	Neg.	Neg.	Neg.	5.3 (3.83)	16:47:00	225000	Negative / Negative
						(84/20)
AAB1+ #3	HPAP038	M/13yo	Caucasian	18.34 (Between 25th-50th Percentile; Normal)	No HX DIAB	GAD+	Neg.	Neg.	Neg.	5.7 (8.29)	13:27:00	259614	Positive / Negative
						(890/20)
AAB1+ #4	HPAP045	F/27yo	Caucasian	26.2 (Overweight)	No HX DIAB	GAD+	Neg.	Neg.	Neg.	5.2 (1.7)	20:33:00	269531	Positive / Negative
						(321/20)
AAB1+ #5	HPAP049	M/29yo	Caucasian	37.2 (Obese)	No HX DIAB	GAD+	Neg.	Neg.	Neg.	5.4 (6.15)	15:36:00	372724	Positive / Negative
						(412/20)
AAB1+ #6	HPAP050	F/21yo	Hispanic	28.99 (Overweight)	No HX DIAB	GAD+	Neg.	Neg.	Neg.	5.1 (3.79)	16:17:00	201075	Positive / Negative
						(203/20)
AAB1+ #7	HPAP072	M/19yo	Hispanic	23.1 (Normal)	No HX DIAB	GAD+	Neg.	Neg.	Neg.	5.6 (4.37)	05:54:00	143042	Positive / Negative
						(204/20)
AAB1+ #8	HPAP092	M/21yo	Hispanic	25.59 (Overweight)	No HX DIAB	GAD+	Neg.	Neg.	Neg.	5.6 (15.35)	18:33:00	247326	Positive / Negative
						-3820
AAB2+ #1	HPAP043	M/15yo	Hispanic	24.07 (Normal)	No HX DIAB	Neg.	IA-2+	Neg.	ZnT8+	5.9 (3.19)	20:00:00	82600	Positive / Negative
						(412/20)	(155/5)		(0.093/0.02)
AAB2+ #2	HPAP107	M/15yo	Caucasian	23.59 (Overweight)	No HX DIAB	GAD+	IA-2+	Neg.	ZnT8+	5.9 (5.49)	19:33:00	191708	Positive / Negative
						(848/20)	(21/5)		(0.071/0.02)
T1D #1	HPAP020	M/14yo	Caucasian	13.32 (Below 3rd Percentile; Underweight)	Recent T1DM	GAD+	IA-2+	mIAA+	ZnT8+	Not measured** (0.37)	13:12:00	40260	Negative / Not measured
					Unsuspected	(29/20)	(207/5)	(0.013/0.01)	(0.073/0.02)
T1D #2	HPAP021	F/13yo	Caucasian	21.4 (Between 75th-85th percentile; Normal)	T1DM	Neg.	Neg.	mIAA+	Neg.	Not measured** (<0.02)	16:49:00	30000	Negative / Negative
					(7 yrs duration)			(0.487/0.01)
T1D #3	HPAP023	F/17yo	Caucasian	21.3 (Between 50th-75th Percentile; Normal)	T1DM	Neg.	Neg.	mIAA+	Neg.	8.9 (<0.02)	21:03:00	26000	Positive / Not measured
					(7 yrs duration)			(0.835/0.01)			(DCD WIT 21 mins)
T1D #4	HPAP032	F/10yo	Caucasian	16.3 (Between 25th-50th Percentile; Normal)	T1DM	Neg.	IA-2+	mIAA+	Neg.	9.0 (<0.02)	11:46:00	31283	Positive / Negative
					(3 yrs duration)		(64/5)	(0.386/0.01)
T1D #5	HPAP055	M/24yo	Hispanic	27.9 (Overweight)	T1DM	GAD+	IA-2+	mIAA+	ZnT8+	10.4 (<0.02)	08:13:00	226101	Positive / Positive
					(7 yrs duration)	(55/20)	(255/5)	(0.013/0.010)	(1.099/0.020)
T1D #6	HPAP064	M/24yo	African American	16.98 (Underweight)	T1DM	Neg.	Neg.	Neg.	ZnT8+	13 (<0.25)	17:53:00	313416	Positive / Negative
					(unknown)				(0.027/0.020)
T1D #7	HPAP071	F/12yo	Caucasian	15.42 (Underweight)	T1DM	Neg.	IA-2+	mIAA+	Neg.	9.8 (<0.06)	19:42:00	105977	Negative / Negative
					(unknown)		(245/5)	(0.071/0.010)
T1D #8	HPAP084	F/12yo	Caucasian	18.5 ( Normal)	T1DM	GAD+	IA-2+	Neg.	ZnT8+	13.3 (2.2)	11:30:00	62852	Negative / Negative
					(Unknown)	(27/20)	(139/5)		(0.116/0.020)
T1D #9	HPAP087	F/15yo	Caucasian	19.3 ( Normal)	T1DM	Neg.	Neg.	mIAA+	Neg.	10.4 (<0.02)	15:49:00	20585	Positive / Negative
					(6~10 yrs duration)			(0.147/0.010)
(†Control #6) Serum sample drawn on admission to the hospital (screening sample) revealed GAD+ by screening lab. However confirmatory Aab testing of screening and recovery samples were negative
(*Control #9) Due to scant blood sample the A1c value is represented as a range due to dilution of assay performed at UF.
(**Control #11, T1D #1, and T1D #2) ‘Not measured’ indicates that the HbA1c tests were not carried out on samples from these three patients.
(***T1D #4) Accessed the pediatrician office chart of the patient 6 months prior to organ recovery and noted these antibodies were positive ICA+, GAD+, IAA+.

## Sheet: Table S3
Table3: Relative expression of various PARPs in HPAP transcriptomics datasets
aab1 vs nd							aab2 vs nd							t1d vs nd
	p_val	avg_log2FC	pct.1	pct.2	p_val_adj			p_val	avg_log2FC	pct.1	pct.2	p_val_adj			p_val	avg_log2FC	pct.1	pct.2	p_val_adj
PARP1	1.04950109594514e-05	-0.221451	0.192	0.225	0.287196		PARP1	2.63991518800471e-32	-0.656843	0.137	0.225	7.2241279119749e-28		PARP1	4.63669092479286e-34	0.908541	0.346	0.225	1.26883047156957e-29
PARP2	0.0340304	-0.180502	0.102	0.113	1		PARP2	4.62242949382233e-16	-0.669214	0.069	0.113	1.26492783098448e-11		PARP2	0.224054	-0.0375948	0.103	0.113	1
PARP4	0.174413	0.243968	0.039	0.035	1		PARP4	3.67176306867292e-20	-2.06375	0.008	0.035	1.00477796374234e-15		PARP4	2.83820714535843e-22	1.37816	0.087	0.035	7.76675385327335e-18
PARP6	0.0178099	-0.132958	0.14	0.156	1		PARP6	1.70523380823638e-50	-1.26715	0.065	0.156	4.66637231623884e-46		PARP6	9.6909598722961e-21	0.774128	0.243	0.156	2.65193116905383e-16
TIPARP	0.000624775	-0.180567	0.166	0.19	1		TIPARP	7.37762045057814e-80	-1.50391	0.067	0.19	2.01888583630071e-75		TIPARP	6.55430513285617e-07	0.539694	0.236	0.19	0.0179359
PARP8	0.10607	-0.132839	0.083	0.092	1		PARP8	2.83884742243764e-06	-0.375795	0.067	0.092	0.0776851		PARP8	4.4871193493098e-45	1.35367	0.206	0.092	1.22790020993863e-40
PARP9	3.08608337596509e-09	-0.754008	0.042	0.066	8.44506715832848e-05		PARP9	9.18296489923356e-13	-0.868849	0.036	0.066	2.51291834467527e-08		PARP9	4.06974984808758e-12	0.78345	0.114	0.066	1.11368704592917e-07
PARP12	0.00167647	-0.502285	0.02	0.029	1		PARP12	8.37221035114107e-06	-0.815095	0.016	0.029	0.229106		PARP11	1.42759466555543e-09	1.12335	0.048	0.022	3.90661280229244e-05
ZC3HAV1	2.68234776969776e-36	-1.5802	0.028	0.08	7.34024467177793e-32		ZC3HAV1	7.50934560902216e-51	-2.21966	0.017	0.08	2.05493242590891e-46		PARP12	1.96170692331326e-07	0.939424	0.054	0.029	0.00536821
TNKS	6.84680042206055e-15	-0.522725	0.135	0.186	1.87362693549687e-10		TNKS	1.49881466190296e-41	-0.930516	0.096	0.186	4.10150632229745e-37		ZC3HAV1	0.611459	0.125797	0.083	0.08	1
TNKS2	0.175965	-0.0874232	0.218	0.227	1		TNKS2	1.41626607228003e-37	-0.734013	0.132	0.227	3.87561210679431e-33		PARP14	2.06726471612008e-23	1.66577	0.075	0.026	5.65706989566259e-19
														PARP16	0.135764	0.365351	0.03	0.024	1
														TNKS	4.83335644049409e-06	0.417083	0.23	0.186	0.132265
														TNKS2	2.28469659713273e-16	0.636606	0.308	0.227	6.25207223805373e-12

## Sheet: Table S4
Table4: Primary and secondary fliFISH probe sequence
Primary Probes
INS2-1	GTGCTGCTTGACAAAAGCCT CCTCCTAAGTTTCGAGCTGGACTCAGTG
INS2-2	CCACCAGGTGGGAACCACAA CCTCCTAAGTTTCGAGCTGGACTCAGTG
INS2-3	CATGGGTGTGTAGAAGAAGC CCTCCTAAGTTTCGAGCTGGACTCAGTG
INS2-4	CAAGGTCTGAAGGTCACCTG CCTCCTAAGTTTCGAGCTGGACTCAGTG
INS2-5	CAGCACTGATCTACAATGCC CCTCCTAAGTTTCGAGCTGGACTCAGTG
INS2-6	TAGTTGCAGTAGTTCTCCAG CCTCCTAAGTTTCGAGCTGGACTCAGTG
INS2-7	GGCCATGTTGAAACAATAAC CCTCCTAAGTTTCGAGCTGGACTCAGTG
INS2-8	CCACACACCAGGTAGAGAGC CCTCCTAAGTTTCGAGCTGGACTCAGTG
INS2-9	CATGGGTGTGTAGAAGAAGC CCTCCTAAGTTTCGAGCTGGACTCAGTG
INS2-10	TGTGGGTCCTCCACTTCACG CCTCCTAAGTTTCGAGCTGGACTCAGTG
INS2-11	CACTGATCTACAATGCCACG CCTCCTAAGTTTCGAGCTGGACTCAGTG
INS2-12	TAGTTGCAGTAGTTCTCCAG CCTCCTAAGTTTCGAGCTGGACTCAGTG
Secondary Probe
FLAP Alex647	5’-/5Alex647N/CAC TGA GTC CAG CTC GAA ACT TAG GAG G/3AlexF647N/-3’

## Sheet: Table S5
Primer Name	Sequence	Vendor
INS2Intron2/exon-Fwd2	TGGCTTCTTCTACACACCCA	IDT
INS2Intron2/exon-Rev2	AGAAAACCAGGGTAGTTAGCAC	IDT
Parp12-Fwd	GGGATTTAAGAAGATCACTCTG	Milipore
Parp12-Rev	AGTAGAAAGGTAGTGTACGG	Milipore
Ins2-Fwd	AGCAGGAAGGTTATTGTTTC	Milipore
Ins2-Rev	ACATGGGTGTGTAGAAGAAG	Milipore
Irf9-Fwd	CTACTTCTGTATAGAGATTTGGC	Milipore
Irf9-Rev	GATGAGATTCTCTTGGCTATG	Milipore
RLP13-Fwd	CCTATGACAAGAAAAAGCGG	Milipore
RLP13-Rev	CAGGTAAGCAAACTTTCTGG	Milipore
Nono-Fwd	CTTCTTGCTGACTACATTTCC	Milipore
Nono-Rev	CATACTCATACTCAAAGGAGC	Milipore

## Sheet: Table S6
Table5: Global label-free proteomics of MIN6 cells treated with/without CT1 and PARP12 siRNA
			Log2 Fold change (vs. NoCT_NT)																Ttest
			NoCT1- Non target siRNA				NoCT1- PARP12 siRNA				CT1- Nontarget siRNA				CT1- PARP12 siRNA
Majority protein IDs	Protein names	Gene names	Replicate1	Replicate2	Replicate3	Replicate4	Replicate1	Replicate2	Replicate3	Replicate4	Replicate1	Replicate2	Replicate3	Replicate4	Replicate1	Replicate2	Replicate3	Replicate4	NoCT_NT vs NoCT_si	NoCT_NT vs CT_NT	CT_NT vs CT_si
Q9WV03	Protein FAM50A	Fam50a	-0.0267695	0.0817451	-0.0716264	0.0122427	0.0530687	-0.172168	0.260068	-0.34039	-0.332216	-0.599639	-0.56469	-0.944508	-0.0269773	-0.0667256	-0.195443	0.0367801	0.819575	0.00142619	0.00378331
Q8CII2	Cell division cycle protein 123 homolog	Cdc123	-0.333696	-0.16031	0.204826	0.213029	-2.09854	-0.459837	0.536091	0.290627	-2.51157	-0.665059	-1.24307	-0.901163	-0.12614	-0.404659	0.0789893	0.0156535	0.75991	0.00603391	0.00593098
Q99J72;Q3U5C5;E9QMH1;Q3TI69	DNA dC->dU-editing enzyme APOBEC-3	Apobec3	1.00732	-0.535871	-0.721768	-0.527552	0.275342	0.992193	-0.25846	0.878313	2.2423	2.22122	2.44007	1.82378	2.85996	2.5311	2.77348	2.75297	0.319919	0.00043685	0.00615467
Q91WN1	DnaJ homolog subfamily C member 9	Dnajc9	-0.30966	0.186622	0.120217	-0.0466624	0.00613809	-0.166284	0.286356	-0.14676	-0.328812	-0.362883	-0.30824	-0.535737	0.275009	-0.0647606	-0.102158	-0.00156651	0.967032	0.025073	0.00983329
Q8BUV8	Protein GPR107	Gpr107	0.283082	0.126488	-1.23143	0.339912	-1.02863	-1.30967	-0.713888	-1.1627	-1.48434	-1.09862	-1.33302	-1.05358	-0.884753	0.488541	0.334846	0.0677341	0.0426445	0.0268322	0.0156044
Q8R5H6	Wiskott-Aldrich syndrome protein family member 1	Wasf1	0.799766	-0.121107	-0.858663	-0.3433	-0.506889	-1.43057	-0.526619	-0.339066	-1.24171	-2.55538	-1.17339	-1.78018	-1.10969	0.147969	-0.120414	-0.326168	0.237293	0.0458682	0.0169397
Q61425	Hydroxyacyl-coenzyme A dehydrogenase, mitochondrial	Hadh	0.0733766	-0.178287	-0.272011	0.305571	0.84941	-0.0250199	0.371659	0.148407	-0.545913	-0.770897	-0.531984	-0.560849	0.384007	-0.026424	-0.358038	0.478588	0.192625	0.0117994	0.0198861
O54692	Centromere/kinetochore protein zw10 homolog	Zw10	0.591641	-0.518271	0.0540435	-0.40228	-0.329198	-0.891718	-0.662226	-0.254259	-0.643438	-1.21331	-1.43408	-1.0992	-0.492494	-0.662877	-0.668917	-0.533752	0.181058	0.0354195	0.0221404
Q99JZ4;P36536	GTP-binding protein SAR1a	Sar1a	-0.134626	0.210771	-0.0783736	-0.0222985	-0.70242	-0.591758	0.461718	-0.292278	-0.835452	-0.400224	-0.676766	-0.729753	-0.424504	0.0232651	-0.262882	0.18214	0.498667	0.00191766	0.0232009
Q91YK2	Ribosomal RNA processing protein 1 homolog B	Rrp1b	-0.30558	0.436133	0.284146	-0.689146	0.240135	0.736768	-0.0360824	-2.38689	-7.6257	-0.211792	-1.08133	-7.6257	0.463327	0.0244035	0.491274	-0.558256	0.992363	0.0487181	0.0269395
Q8C7K6	Prenylcysteine oxidase-like	Pcyox1l	-0.0568006	-0.222786	0.448138	-0.290852	0.468784	-1.34459	-1.16658	-0.217876	-1.16424	-0.771999	-1.26487	-2.09561	-0.253878	-1.00532	-0.34586	0.000183551	0.414194	0.00704499	0.0297924
Q8JZK9	Hydroxymethylglutaryl-CoA synthase, cytoplasmic	Hmgcs1	0.233114	-0.272877	0.0130564	-0.0176035	-0.0360888	-0.151769	0.679254	-0.0234727	0.588923	0.427184	0.89756	0.682099	1.61061	1.17697	0.938156	1.09052	0.541542	0.00429434	0.0308393
Q8VDJ3;A0A087WP83	Vigilin	Hdlbp	-0.0688269	-0.0108199	0.0880399	-0.0128483	0.0537611	0.108994	0.133438	0.0650204	-0.463899	-0.290088	-0.310321	-0.34642	-0.120853	-0.211432	-0.315837	-0.134249	0.0511833	0.000420488	0.0365741
P49442	Inositol polyphosphate 1-phosphatase	Inpp1	0.594468	0.302118	-0.589116	-0.755404	0.056711	-0.858221	0.604448	-0.277357	1.29271	1.33128	1.23443	1.45536	1.76205	1.32867	1.88519	1.68324	0.960267	0.000691887	0.0405949
Q8VD63	Testis-specific Y-encoded-like protein 4	Tspyl4	0.0902699	-0.0755875	-0.12105	0.0935017	0.205078	0.220805	-0.252047	-0.774919	-1.78011	-2.10077	-0.98241	-1.37358	-0.600454	-0.417904	-0.493508	-1.41951	0.671081	9.89132e-05	0.0412713
Q9WUZ9;Q3TQC7	Ectonucleoside triphosphate diphosphohydrolase 5	Entpd5	-0.0379747	0.635327	-0.507305	-0.378657	-0.968323	-0.960443	-1.05967	-0.0087067	-8.77473	-1.27169	-1.43415	-1.05689	-0.601248	-0.5074	-1.0285	0.0493375	0.15268	0.0213482	0.0412951
P97807	Fumarate hydratase, mitochondrial	Fh	0.0818742	-0.323979	0.202018	-0.0109507	-0.613456	-0.112591	-0.441337	-0.725306	-0.320397	-0.500632	-0.36481	-0.378178	0.276882	-0.00599019	-0.333585	-0.0599496	0.0388099	0.0219784	0.0424379
P52623;F7CBX2;A2AN37	Uridine-cytidine kinase 1;Uridine-cytidine kinase	Uck1	-0.393885	0.182359	-0.143023	0.261308	-0.9366	0.506019	-0.89144	-0.604466	-9.29509	0.0777913	-9.29509	-9.29509	-0.140023	-0.452559	0.35385	0.0609505	0.398482	0.0404844	0.0452841
P51410;A0A0G2JES3;A0A140T8T4;D3Z629	60S ribosomal protein L9	Rpl9	-0.0776077	0.29974	-0.0469252	-0.228618	-0.0426625	-0.0896383	-0.0825449	-0.305834	-0.244598	-0.269701	-0.539231	-0.580588	-0.0481731	-0.237915	-0.257782	-0.0157393	0.380153	0.0404113	0.045613
Q8BTJ4	Bis(5-adenosyl)-triphosphatase enpp4	Enpp4	0.301032	-0.109637	0.230092	-0.581554	-0.236621	0.224544	0.696814	0.562762	2.65363	2.07745	2.01852	2.15215	2.54658	2.73156	2.94822	2.52042	0.241602	0.000420536	0.046442
B1ARD6;A0A5H1ZRL4		Slfn9	0.255617	-0.950706	0.408176	-0.0562402	0.0336956	0.0290842	0.830167	-0.0282169	0.802542	0.57561	0.859854	0.97644	1.08624	0.898553	1.12338	1.03897	0.473016	0.0100534	0.0471598
A0A5F8MPQ4			0.211645	-0.473344	0.490115	-0.479669	-0.488706	-0.488212	0.827297	-0.341665	-0.207537	-9.30146	-9.30146	-9.30146	-0.0534232	-0.742142	-0.478351	-0.270322	0.993255	0.0293713	0.0508453
Q61107	Guanylate-binding protein 4	Gbp4	-1.78947	-0.212136	1.42952	-2.69995	-0.367946	1.41796	1.59254	0.931003	7.69572	7.71763	7.99699	7.83463	8.19051	7.99844	7.8776	8.16348	0.204471	9.27165e-07	0.0518158
P29452	Caspase-1;Caspase-1 subunit p20;Caspase-1 subunit p10	Casp1	0	0	0	0	0	0	0	0	10.6612	10.4676	10.3493	10.66	10.6158	10.9153	10.7382	11.0768	#DIV/0!	1.33645e-06	0.0584542
P62082	40S ribosomal protein S7	Rps7	0.475012	-0.288256	-0.192947	-0.12601	-0.124152	-0.0391731	-0.559736	-0.241754	-0.492862	-0.848418	-0.528694	-1.21058	-0.0491751	-0.793053	0.0295678	-0.108634	0.355828	0.0337494	0.0613494
P46935;A0A571BDN7	E3 ubiquitin-protein ligase NEDD4	Nedd4	0.164486	-0.0490924	-0.00734888	-0.123795	0.0988379	0.0298617	0.30041	0.23165	-0.511746	-0.442564	-0.466314	-0.355137	-0.419641	-0.343955	-0.139336	-0.216679	0.102322	0.00127746	0.0634808
Q91Z40		Gbp7	1.95499	-4.60975	-4.60975	-4.60975	2.86974	2.63169	-4.60975	1.91029	10.9704	11.0736	11.0734	11.0684	11.0996	11.3012	11.2385	11.6063	0.126147	1.80268e-09	0.0673985
Q8BH58	TIP41-like protein	Tiprl	-0.310304	-0.111974	0.0233334	0.324121	-0.0607098	-0.105218	0.587249	-0.170946	0.298206	0.801459	0.591723	0.518199	1.10417	0.865656	0.592895	1.30611	0.700554	0.0150683	0.071404
Q8BLQ9;G3UZM4	Cell adhesion molecule 2	Cadm2	-0.0124263	-0.251438	0.111947	0.121456	0.841467	-1.11194	-1.22111	0.324441	-0.47157	-0.874694	-0.513315	-0.922753	-0.814322	0.0527787	-0.108743	-0.0135578	0.963239	0.00270164	0.0718942
Q8K4W8;Q790S0;A0A6Q6Q7B9;P51791;E9Q2I1	Chloride channel protein;H(+)/Cl(-) exchange transporter 3	Clcn3	0.0434348	-0.0983013	-0.0482403	0.0951657	0.36793	-0.0937277	0.0979498	0.181383	-0.0796644	-0.26844	-0.586718	-0.504189	-0.056481	-0.296007	0.0768029	0.20073	0.222723	0.0232867	0.0723269
Q5I2A0;Q80X76	Serine protease inhibitor A3G;Serine protease inhibitor A3F	Serpina3g;Serpina3f	0	0	0	0	0	0	0	0	8.41847	9.10549	9.01632	0	9.1762	9.87552	9.66209	8.93494	#DIV/0!	0.0313859	0.0744803
Q8BHH2	Ras-related protein Rab-9B	Rab9b	0.350091	-0.301093	0.22435	-0.423776	0.727327	0.238404	-0.559636	-0.0713546	-0.943421	-0.754162	-0.354729	-9.32954	0.885818	0.0278195	0.00419562	-0.686548	0.651003	0.0476188	0.0795778
Q60634;Q5SS83	Flotillin-2	Flot2	-0.134305	-0.314407	0.259849	0.120826	0.603018	-0.31073	0.323236	0.058632	-0.441771	-0.462595	-0.866487	-1.39492	-0.83644	0.356555	-0.131245	0.18608	0.412377	0.0163553	0.0799049
G3X8X0;Q05BH3		Dhx16	0.00747161	-0.101651	-0.367841	0.365021	0.413362	-0.989926	0.328466	0.067555	-2.26748	-2.88552	-1.88806	-1.96693	-2.00911	0.676817	0.347231	-1.20407	0.877307	0.000417637	0.0855639
Q9QZ85	Interferon-inducible GTPase 1	Iigp1	-9.50842	-2.1877	-1.3883	1.76431	1.4238	1.36563	-1.66968	-9.50842	7.96046	7.84732	8.2584	7.74756	8.18763	8.40658	8.18802	8.11024	0.726947	1.62448e-05	0.0863621
P35951;A0A1L1SRE8	Low-density lipoprotein receptor	Ldlr	0.21098	-0.131844	-0.436681	0.252208	-0.212269	0.18215	-0.195594	1.00294	-1.01636	-2.10043	-8.63516	-2.00895	-0.822395	-0.983301	-0.638064	-1.77311	0.478685	0.00211732	0.086382
Q00547	Hyaluronan mediated motility receptor	Hmmr	0.392555	-0.0558031	-0.0435655	-0.405507	-0.58228	-0.403934	0.015412	-0.272008	-1.50505	-1.31426	-1.01898	-1.72589	-0.708376	-0.876345	-1.05809	-1.32621	0.225733	0.00245408	0.0940993
Q9ERD7	Tubulin beta-3 chain	Tubb3	-0.150979	-0.0130561	0.172937	-0.0276476	0.424874	0.307903	-0.0210699	-0.083668	0.708512	0.558858	0.507272	0.168994	0.91121	0.949524	0.400449	1.14423	0.281184	0.0120542	0.0968252
Q9D735	Uncharacterized protein C19orf43 homolog		0.241198	-0.0612847	-0.378069	0.124526	-1.33835	-0.460177	0.114244	-1.327	-0.535084	-1.02345	-0.745723	-1.32754	-0.754319	-0.650042	0.403265	0.575736	0.110213	0.00594987	0.0995546
P35700;B1AXW5;B1AXW6;B1AXW4	Peroxiredoxin-1	Prdx1	-0.0249905	0.0377144	-0.00853518	-0.00493481	0.126271	-0.0593686	-0.0630269	-0.407029	-0.161007	-0.13219	-0.103599	-0.0868986	-0.0206343	-0.128738	0.00993731	0.183993	0.430483	0.00120171	0.102577
Q62266	Cornifin-A	Sprr1a	0	0	0	0	0	0	0	0	10.7126	10.1486	10.8399	10.9805	10.8599	10.9149	11.2132	11.1372	#DIV/0!	0.000123901	0.102928
Q69ZK0;I7HPV9	Phosphatidylinositol 3,4,5-trisphosphate-dependent Rac exchanger 1 protein	Prex1	-0.449339	-0.729112	-0.377578	0.921907	1.00121	-0.701899	-0.292945	0.844496	1.26192	1.19468	0.495321	1.49025	1.4717	2.52641	1.60274	1.63882	0.528026	0.0267634	0.105898
Q3UA16;A2AUT4	Kinetochore protein Spc25	Spc25	0.217859	0.0402724	-0.223623	-0.0705525	0.292204	0.0258079	0.155076	-0.249863	-0.730438	-0.12141	-0.572966	-1.00513	0.0919948	0.323755	-0.870976	0.3164	0.652122	0.0253046	0.109248
Q9WVK4	EH domain-containing protein 1	Ehd1	-0.00735394	-0.294047	0.0803043	0.17917	0.429926	0.111259	0.302851	-0.230846	0.261872	0.388905	0.295942	0.375222	0.848104	0.431346	0.302085	0.740668	0.350126	0.0120005	0.109783
Q8VDV8	MIT domain-containing protein 1	Mitd1	0	0	0	0	0	0	0	7.22997	9.51149	9.44603	0	8.53067	9.10335	10.3843	9.83167	9.50856	0.355918	0.0387767	0.121439
P06151;A0A1B0GSX0;A0A1B0GSR9;D3YZQ9;A0A1B0GT41;A0A1B0GQX5	L-lactate dehydrogenase A chain;L-lactate dehydrogenase	Ldha	-0.0146965	-0.103183	-0.0650124	0.167642	0.626656	0.173178	-0.533402	0.308963	-1.10358	-1.18505	-1.00648	-0.779994	-0.793872	-0.65587	-1.01415	-0.776239	0.439835	7.63643e-05	0.121955
Q8BUL6;D6RCU3;D3YU01;F6YLP9	Pleckstrin homology domain-containing family A member 1	Plekha1	0.450607	-0.32036	0.568523	-1.51659	-1.04157	-1.14965	-1.926	-0.0383234	-8.79294	-1.29847	-8.79294	-0.871136	0.110852	-0.275123	-8.79294	0.366902	0.18328	0.0433413	0.125626
O89079;D3Z315;F6YFR7	Coatomer subunit epsilon	Cope	-0.323413	0.0501717	0.0222172	0.201528	0.00821795	-0.538293	0.0416686	-0.140184	-0.31559	-0.429275	-0.374547	-0.493843	0.185094	-0.767763	0.306768	0.128112	0.42063	0.0185031	0.130601
Q60823;F8WHG5;D3Z3N2;D3YXM7	RAC-beta serine/threonine-protein kinase	Akt2	0.10774	-0.176396	-0.00364086	0.0566814	0.35219	0.278864	0.221172	0.063229	-0.370791	-0.226421	-0.310342	-0.273236	-0.0856128	-0.0836598	-0.36712	0.208282	0.0346028	0.0064256	0.132555
Q80T06;P57776;E9QN08;D3YUQ9;D3YZT9	Elongation factor 1-delta	Eef1d	-0.176583	-0.0876163	0.139825	0.100784	-0.355593	-0.367641	-0.565393	-0.471623	-0.55014	-0.208956	-0.203499	-0.203974	0.0705092	-0.485478	0.192647	0.235532	0.00391265	0.0419836	0.133749
Q8CI95;G5E8A0;A0A338P6F2	Oxysterol-binding protein-related protein 11;Oxysterol-binding protein	Osbpl11	0.884707	0.246761	-0.0963972	-4.97919	-4.97919	1.08801	1.10281	0.771707	-4.97919	-4.97919	-4.97919	-4.97919	-4.97919	0.737359	-4.97919	0.648287	0.452234	0.0418839	0.134292
Q80XP9;V9GWU7;V9GXP7	Serine/threonine-protein kinase WNK3	Wnk3	-0.130582	0.912806	0.244893	-5.73093	0.546493	-5.73093	0.828087	-5.73093	-5.73093	-5.73093	-5.73093	-5.73093	-5.73093	-5.73093	-0.0353428	-0.191196	0.774103	0.0437842	0.134947
Q8N9S3;F6S1R2;A2AF81;A2AF82	Activator of 90 kDa heat shock protein ATPase homolog 2	Ahsa2	-0.79956	-0.355856	0.257631	0.534615	-1.05526	-0.169619	0.378948	-0.267359	-1.45675	-1.05475	-1.35963	-1.82175	1.15861	-1.60551	-1.11504	0.848535	0.647738	0.0217816	0.135151
Q9Z2G9;Q3U816	Oxidoreductase HTATIP2	Htatip2	-0.0963707	-0.00230645	0.0894782	0.00321217	0.238375	-0.191696	0.188149	-0.0684583	-0.537299	-0.280167	-0.0444363	-0.236048	0.104398	0.111812	-0.176527	-0.217328	0.649585	0.0384025	0.136322
Q99KX1	Myeloid leukemia factor 2	Mlf2	0.068101	0.00312007	-0.534908	0.332618	-0.129824	0.657087	0.442489	0.439218	-9.03609	-0.227328	-9.03609	-9.03609	0.00561023	-9.03609	0.160924	0.124615	0.148931	0.0179904	0.136655
Q9D819	Inorganic pyrophosphatase	Ppa1	0.0742415	-0.0952851	0.201015	-0.214912	-0.0682444	-0.0182755	-0.0320605	0.170113	0.649754	0.554931	0.859515	0.763509	0.808989	0.894028	0.741067	1.10591	0.886259	0.000644901	0.138295
P97371;G3UXZ5;G3UXY0;G3X9K9;G3UWN9	Proteasome activator complex subunit 1	Psme1	-0.124153	-0.0351025	0.106325	0.0426616	0.289588	0.196107	0.48907	0.214575	1.82724	2.07496	2.1538	1.86899	1.99588	2.25978	2.08902	2.3426	0.0144473	1.03761e-05	0.139509
Q8BIK4;E9QMR2;A0A1D5RLE0;A0A5F8MPL9;A0A1D5RMM1;F8VPN7	Dedicator of cytokinesis protein 9	Dock9	-0.682645	0.762472	-0.237831	-0.264368	-4.83375	-4.83375	-0.269136	-4.83375	-4.83375	-4.83375	-4.83375	-4.83375	-0.097705	-0.676209	-4.83375	-4.83375	0.0482531	0.00665899	0.147538
F8VQ54;Q8R418	Endoribonuclease Dicer	Dicer1	-0.710424	-0.132564	0.615341	-0.0820252	-2.39645	0.0570134	-8.46865	-8.46865	-2.20116	-1.56342	-2.91321	-8.46865	2.79452	-0.211411	-0.0931898	0.602722	0.0698742	0.006858	0.154145
I7HPY1;I7HJS7;Q9D8T0;I7HLV5	Protein FAM3A	Fam3a	-0.0851554	0.131278	-0.405216	0.271342	0.00230905	0.134792	-0.033199	0.3019	-0.0912378	-1.37131	-1.63681	-1.80274	-0.54854	-0.627304	-0.0160405	-0.469474	0.521937	0.0295164	0.157641
A0A338P7E3;A0A338P711;C0HKG6;C0HKG5			-0.323934	0.539013	-0.0622908	-0.339361	0.566616	0.463871	0.644394	-0.190696	0.745147	0.924241	0.853778	0.897476	0.777212	1.21141	0.932216	1.27834	0.188875	0.00253182	0.160425
Q6GTM0;Q64112	Interferon-induced protein with tetratricopeptide repeats 2	Ifit2	-3.89151	-3.89151	1.92519	-3.89151	-3.89151	-3.89151	-3.89151	4.29279	8.98585	9.3657	9.13305	9.22448	9.50883	9.28681	9.15147	9.52822	0.457089	1.8352e-06	0.160879
P29595	NEDD8	Nedd8	-0.125224	-0.0886637	0.0539403	0.143588	0.0851169	-1.37476	-0.394084	-1.08615	-2.59636	-1.28466	-2.36917	-2.66311	-0.213628	-0.459183	-0.235295	2.24339	0.0833325	4.76429e-05	0.16314
Q8R0A7;Q3TA40;Q8BQB5	Uncharacterized protein KIAA0513	Kiaa0513;6430548M08Rik	-0.642152	-0.334791	0.427523	0.288562	0.14835	0.039875	0.156848	-0.376774	-0.716603	-0.800744	-0.781326	-1.38885	-0.736754	-0.905218	-0.314792	-0.500187	0.97814	0.039044	0.165768
Q8VDU3;Q8C7I4		Apol9a;Apol9b	0	0	0	0	0	0	0	10.8986	14.5816	14.21	14.5592	14.1354	14.7851	14.4151	14.4257	14.9407	0.355918	1.55686e-05	0.176324
O88622;G3X8U8;E9Q954;E9Q088;A0A2I3BRU5	Poly(ADP-ribose) glycohydrolase	Parg	-1.00162	0.174596	-0.517169	0.742586	-1.42067	-0.433721	-1.62779	-2.25855	-2.45553	-9.379	-1.9652	-2.39585	2.04311	0.0445605	-0.670826	-2.09989	0.0838648	0.0192777	0.180916
Q9R0H0;A2A848	Peroxisomal acyl-coenzyme A oxidase 1	Acox1	0.045377	-0.0802829	-0.0145724	0.0457574	0.134435	0.508351	-0.243911	-0.0429002	-0.97762	-1.34588	-1.09716	-1.0724	-1.13256	-0.734988	-1.07465	-0.387847	0.530164	2.67644e-06	0.183278
Q6PD31;Q6P9N8;A0A1B0GRL4;A0A1B0GSQ2;A0A1B0GRP1;A0A1B0GRS7;G3UYW9;A0A1B0GRQ7;A0A5F8MPD8	Trafficking kinesin-binding protein 1	Trak1;Trak2	-0.201414	0.560194	0.705716	-5.32886	0.660481	0.552755	-5.32886	1.0256	-5.32886	-5.32886	-5.32886	-5.32886	1.37944	0.145781	-5.32886	-5.32886	0.642671	0.0366353	0.184399
S4R2L4;S4R265;A2RTL5;S4R1M5	Arginine/serine-rich coiled-coil protein 2	Rsrc2	0.193693	0.192558	-0.576373	0.0605694	-0.638329	-0.414545	-1.09008	-0.898908	-0.921988	-0.899917	-0.597784	-0.800217	-0.833402	-0.489184	-0.491619	0.381251	0.0204202	0.010638	0.189149
O08529	Calpain-2 catalytic subunit	Capn2	0.117058	-0.112957	0.105164	-0.127887	-0.127717	-0.223711	-0.264366	-0.0289006	-0.249981	-0.344117	-0.134527	-0.301847	-0.0521869	-0.111707	-0.349769	0.230755	0.117343	0.0229399	0.192487
Q9JJV1	Beta-crystallin A2	Cryba2	-0.0796666	-0.0582711	0.160192	-0.035234	-0.197569	-0.0721148	-0.142558	-0.260134	-0.382623	-0.24335	-0.517823	-0.292171	-0.409505	-0.30212	-0.0280998	-0.075419	0.058404	0.0051936	0.197285
Q9CPQ1	Cytochrome c oxidase subunit 6C	Cox6c	0.0643162	-0.18701	0.172009	-0.0749726	-0.222952	-0.47815	0.16536	0.442327	0.233279	0.297407	0.436835	0.257325	0.60445	0.332964	0.333326	0.413274	0.931058	0.0123392	0.204093
P61025;Q3UNC9;V9GWZ0;D3YXP1	Cyclin-dependent kinases regulatory subunit 1;Cyclin-dependent kinases regulatory subunit	Cks1b;Cks1brt	-0.296429	0.137995	-0.428341	0.424646	-0.228291	-0.077384	-0.527147	-0.134101	-0.916825	-0.315315	-11.7907	-0.962381	-0.422987	-0.104471	-0.821022	-0.611583	0.356977	0.0477313	0.205439
Q8BGQ7	Alanine--tRNA ligase, cytoplasmic	Aars	-0.0550642	0.141552	-0.0919876	-0.00559681	-0.0216709	0.363497	0.0884008	0.0235594	0.110618	0.285994	0.251424	0.118962	0.707936	0.230589	0.14265	0.437356	0.29893	0.0302967	0.212072
Q80TR4;E9QAW9;E9Q2P0	Slit homolog 1 protein	Slit1	0.130268	-0.296441	-0.135831	0.24013	0.267219	0.776254	0.377042	0.277342	-1.64848	-2.11979	-1.73914	-1.46309	-1.87462	-1.21309	-1.29853	-1.51684	0.0512418	0.000218125	0.214124
Q64339	Ubiquitin-like protein ISG15	Isg15	1.9952	-7.81812	-7.81812	-7.81812	-7.81812	1.7268	2.75664	2.97545	9.00587	9.72177	8.19801	8.92873	9.6706	10.1452	9.0859	9.264	0.138503	0.00342437	0.215546
Q9QWT9;E9PUA5	Kinesin-like protein KIFC1;Kinesin-like protein	Kifc1;Kifc5b	0.152477	-0.0838423	0.0208328	-0.104019	0.0705716	0.259733	0.63105	-0.32678	-0.920521	-0.433473	-0.544675	-0.48238	-0.574674	-0.253897	0.0977877	-0.580328	0.396016	0.00190943	0.221329
Q9DBL1;E9Q5L3	Short/branched chain specific acyl-CoA dehydrogenase, mitochondrial	Acadsb	-0.178708	0.0147016	0.235964	-0.106917	0.147155	-0.282178	0.0819108	-0.365648	-0.449809	-0.331891	-0.425778	-0.384432	-0.307518	-0.407439	-0.344377	0.0298006	0.596013	0.0108894	0.227338
Q7TT37	Elongator complex protein 1	Ikbkap	-0.0269883	-0.109316	0.17944	-0.0603048	0.147318	-0.351141	-0.143165	0.0385449	-0.325965	-0.372897	-0.153434	-0.119937	-0.216529	0.177959	-0.350778	0.189728	0.620079	0.0399836	0.230903
O89112;B2KGR2	LanC-like protein 1	Lancl1	-0.112037	-0.216395	0.172229	0.120628	-0.17897	-0.325893	0.0784437	-0.798136	-0.283906	-0.411876	-0.703726	-0.316706	-0.378057	-0.283554	-0.31956	0.317588	0.196936	0.0187538	0.232288
Q9D0N7	Chromatin assembly factor 1 subunit B	Chaf1b	-0.0273021	0.00398397	0.103956	-0.0873271	-0.186797	0.102377	-0.460773	0.161081	-0.072944	-0.423104	-0.252963	-0.372374	0.0592456	-0.340187	-0.184767	-0.0413635	0.611491	0.0179049	0.236616
Q07797	Galectin-3-binding protein	Lgals3bp	-0.465025	0.267104	-0.0549176	0.149912	-0.720107	0.30485	-0.317739	-0.518543	1.4858	2.69683	1.81616	2.49766	2.4659	2.54346	2.58766	2.50536	0.38107	0.00613311	0.237392
P97372;G3X9V0;E0CZ90	Proteasome activator complex subunit 2	Psme2	-0.559794	-0.235157	0.530412	0.0393721	0.0352835	0.0670805	-0.471572	-0.441826	2.24551	1.48064	1.97892	1.83907	2.4794	2.0023	2.20086	1.93874	0.552505	0.000733683	0.237722
Q8K009;D3Z6B9	Mitochondrial 10-formyltetrahydrofolate dehydrogenase	Aldh1l2	-0.00737019	-0.0371149	-0.00721003	0.0502979	0.131457	0.0238234	0.128134	0.0365773	-0.0535651	-0.276165	-0.349915	-0.312977	-0.299715	-0.124479	-0.0910465	0.0198078	0.0583514	0.0106106	0.238939
Q8C3V4;A0A087WSP5;P42225	Signal transducer and activator of transcription;Signal transducer and activator of transcription 1	Stat1	-0.0106659	0.211988	-0.280106	0.0364011	0.154735	-0.227918	0.305697	0.500978	4.90288	5.10825	5.25386	5.17365	5.17479	5.27816	5.08789	5.56205	0.30069	1.28849e-06	0.243984
Q3ULW8		Parp3	1.02684	-5.98423	-0.049806	-0.0282915	0.592296	-5.98423	-5.98423	-5.98423	4.91713	5.06252	5.247	5.01677	5.39419	5.13335	5.30077	4.9879	0.31413	1.26707e-06	0.249858
P09411;S4R2M7	Phosphoglycerate kinase 1;Phosphoglycerate kinase	Pgk1	0.0406578	-0.0799725	0.0393365	-0.00332127	0.119016	0.0168007	-0.116761	-0.0354958	-0.562308	-0.715622	-0.467095	-0.294499	-0.272865	-0.356913	-0.57345	-0.257089	0.978939	0.000816656	0.250705
Q5NCB2;Q5SVP0;Q5NCB3;A6PWD6;Q5SVP2		Gm12185;9930111J21Rik1;Gm5431;9930111J21Rik2	0	0	0	0	10.6862	0	0	10.3667	8.52009	9.21912	9.5483	9.28385	10.5245	9.3115	9.43656	9.33673	0.137864	0.000329569	0.251013
Q99J64	RNA-binding protein 43	Rbm43	0	0	0	0	0	0	0	0	8.52094	8.60454	8.66864	8.69744	8.77696	8.923	8.50532	8.7464	#DIV/0!	2.53038e-08	0.252027
P35276;D3YWL1;D3YW33	Ras-related protein Rab-3D	Rab3d	0.0461026	0.059731	-0.119432	0.00677432	0.0608871	-0.0175118	0.0337177	-0.243499	-0.344449	-0.609381	-0.162324	-0.397339	-0.206408	-0.269348	-0.0861805	-0.383231	0.650031	0.0069561	0.252929
O88738;S4R1L5;S4R2P8	Baculoviral IAP repeat-containing protein 6	Birc6	0.234138	0.00433156	0.150463	-0.492355	-0.40763	-0.13262	0.0834527	-0.151949	-0.609983	-1.44104	-0.693821	-0.451871	-0.0817988	-0.936061	-0.651487	-0.112591	0.465966	0.0199481	0.258086
A0A171EBL2			-1.49923	-1.3176	0.7162	0.68006	-0.509387	0.249693	0.394758	1.11949	4.19504	4.34886	4.35825	4.34544	4.71256	4.30753	4.25784	4.51769	0.492838	9.61301e-08	0.258319
G3X9I1;G5E911;Q91VU0	Protein FAM3C	Fam3c	0.0394255	0.19316	0.0535799	-0.337898	-0.594435	-0.944823	-0.117153	-0.923456	-1.84642	-0.440077	-0.735031	-1.61076	-0.420742	-0.904147	0.837708	-1.04069	0.0289555	0.00818941	0.260131
Q9D7P6;D3Z7W0;D3Z0K9	Iron-sulfur cluster assembly enzyme ISCU, mitochondrial	Iscu	-0.0563334	-0.258891	0.243895	0.0262752	0.0550342	-0.802053	-0.50632	-0.246065	-0.609723	-1.04637	-0.854271	-1.76993	-1.25616	-0.55091	-0.0166407	-0.743297	0.138657	0.00303237	0.261343
A0A286YDH6			-0.14702	-0.413195	0.363792	0.0828714	0.102601	-0.593568	0.633181	-0.357858	-1.00044	-8.6788	-0.70264	-8.6788	-1.09706	-8.6788	-0.0513223	0.336871	0.943375	0.0109177	0.265406
P05063	Fructose-bisphosphate aldolase C	Aldoc	0.0815667	-0.0672015	0.364744	-0.515207	0.336742	0.351329	-0.539653	0.303438	-1.04205	-0.992125	-1.55704	-0.680044	-0.924124	-0.453306	-1.33717	0.219294	0.561981	0.0090891	0.269648
Q9QYB1	Chloride intracellular channel protein 4	Clic4	0.0407758	-0.0143502	0.014918	-0.0426994	-0.282819	-0.134607	0.0201951	-0.0298546	0.0842252	0.680321	0.61571	0.52087	1.01664	0.490631	0.574522	0.674608	0.172706	0.0153104	0.272325
P16014	Secretogranin-1;CCB peptide;PE-11	Chgb	-0.109421	-0.578293	0.670581	-0.301212	-0.173227	-0.198875	-0.575336	-0.613148	0.703343	0.527241	0.972412	0.76543	0.950335	1.30891	0.349091	1.37628	0.324285	0.0253627	0.27311
O54791;A0A2R8VHY0	Transcription factor MafF	Maff	-6.85943	-6.85943	1.99065	-6.85943	-6.85943	1.59453	-6.85943	-6.85943	2.72524	2.75686	2.63049	1.8194	3.50184	2.50211	2.44767	3.03694	0.854352	0.00870277	0.273145
Q8HWB2		H2-Q4	-6.77596	-6.77596	1.99009	-6.77596	-1.03865	-6.77596	3.42917	1.72472	6.18946	6.16491	6.25046	5.98165	6.27379	6.26735	6.12058	6.24841	0.361292	3.5875e-07	0.274531
Q80U56	Late secretory pathway protein AVL9 homolog	Avl9	0.1565	-0.504709	0.00179903	0.238017	-0.37301	0.226907	0.778839	0.220226	1.2863	0.795305	0.71416	0.470276	1.54162	0.847607	0.95922	1.10363	0.386696	0.0182079	0.276142
P0DOV1			0.556647	0.689491	-6.92111	-0.13894	-6.92111	-1.00439	-6.92111	-6.92111	5.80433	5.28364	3.92182	4.98474	5.72907	5.75698	4.77282	5.90931	0.0642303	0.00656881	0.280115
Q9EQG9	Collagen type IV alpha-3-binding protein	Col4a3bp	-0.119968	-0.0138531	0.117573	0.00639173	-0.226653	-0.0305237	-0.193389	-0.796027	-0.401685	-0.554329	-0.429946	-0.181297	-0.0392002	-0.199143	-0.517979	-0.226702	0.101252	0.004866	0.280774
Q9CQC9	GTP-binding protein SAR1b	Sar1b	0.229234	-0.42832	0.134272	-0.0186995	-0.535015	-0.559468	-0.439132	-0.682569	-2.04097	-1.38528	-2.48428	-3.25818	-2.44715	-2.02874	-1.27503	-0.883288	0.0166406	0.000431018	0.282821
P32921	Tryptophan--tRNA ligase, cytoplasmic;T1-TrpRS;T2-TrpRS	Wars	0.281931	0.22999	-0.413359	-0.216789	-0.234813	-0.266161	-0.284339	-0.171734	0.622239	0.986451	1.4198	1.07906	1.45026	1.44813	0.905057	1.28326	0.235609	0.00613721	0.283059
Q8R059	UDP-glucose 4-epimerase	Gale	0.160279	-0.0668897	0.0581185	-0.173489	-0.774881	-0.508731	-0.484039	-0.682761	-0.593072	-0.233128	-0.615301	-0.497538	0.796661	0.11116	-1.0211	-0.284894	0.00116094	0.00607807	0.28528
Q9JL16;A0A0U1RP59	Interferon-stimulated gene 20 kDa protein	Isg20	-0.68116	0.104404	0.376231	0.00480991	0.144527	-0.844642	0.906305	0.390256	4.07559	4.16384	3.50487	4.12366	4.64371	4.12718	4.02199	4.06831	0.515007	6.89041e-05	0.288901
P04925	Major prion protein	Prnp	-0.000595895	-0.50981	0.251787	0.147199	-0.0766253	-0.362854	-0.104613	-0.835292	-1.20236	-1.07335	-1.49179	-0.559713	-0.720158	-0.781224	-0.836406	-0.935416	0.209575	0.00672576	0.292434
P0C028;P0C027	Diphosphoinositol polyphosphate phosphohydrolase 3-beta;Diphosphoinositol polyphosphate phosphohydrolase 3-alpha	Nudt11;Nudt10	0.0891232	-0.0962519	0.114519	-0.123116	-0.000913102	-0.320516	-0.622319	-0.00348031	-0.72535	-0.450098	-0.52773	-0.624572	-0.357548	-0.633107	-0.585747	-0.27338	0.195285	0.000624363	0.292744
Q9JHW2;A0A338P6G0;A0A338P7A1	Omega-amidase NIT2	Nit2	-0.46041	0.110728	0.183816	0.0807432	-0.0435294	-0.678644	0.256988	-0.918513	0.903174	0.660559	0.936322	0.64714	0.751537	0.911032	0.913489	0.996657	0.380549	0.00137931	0.299809
Q6P5E6	ADP-ribosylation factor-binding protein GGA2	Gga2	-0.264126	-0.306139	0.176188	0.297014	0.474258	-0.312606	-1.19598	-0.0970234	-9.45796	-1.84215	-0.800474	-0.394232	-0.0567761	-1.18819	-0.940094	-0.730703	0.643994	0.0234077	0.305222
Q9DCZ1;F6VY18	GMP reductase 1	Gmpr	-0.224423	0.0274331	0.0970446	0.0776334	-0.0573962	-0.0877648	0.281998	-0.16825	-0.342086	-0.318619	-0.508573	-0.515385	-0.591008	-0.327552	-0.160711	-0.0982833	0.983073	0.00421675	0.30534
P40124	Adenylyl cyclase-associated protein 1	Cap1	-0.0402637	0.032869	0.059497	-0.0553276	-0.410197	-0.332942	-0.204919	-0.305647	-0.394302	-0.258413	0.00932855	-0.285314	-0.0751777	-0.424034	0.0832689	0.119943	0.000724864	0.0426181	0.308989
Q9Z0V7	Mitochondrial import inner membrane translocase subunit Tim17-B	Timm17b	0.129377	-0.477212	0.21551	0.0380147	-0.0100215	0.301913	-0.974933	-0.228768	-0.656792	-0.999834	-1.3568	-1.10381	-1.63076	0.00143804	-0.103865	-1.02547	0.58822	0.00386984	0.317273
Q9JK48;A0A0G2JEC4	Endophilin-B1	Sh3glb1	-0.348575	0.243159	-0.191688	0.20849	-0.0410721	0.113186	-0.277202	0.0172603	0.653854	0.298609	0.847582	0.249278	0.446342	0.627306	1.9343	0.728062	0.817888	0.0441699	0.318571
P01887	Beta-2-microglobulin	B2m	-1.40333	-0.478963	0.938568	-0.0176726	-0.683125	0.197606	1.30452	-0.508674	6.46174	6.21741	6.99245	6.54614	7.33301	6.41688	6.69984	6.87916	0.677799	0.00015163	0.321234
D5MCW4;Q9CQ89	Protein CutA	Cuta	-0.534864	0.549406	-3.32238	0.804322	-13.5484	-4.99502	0.653268	-5.08829	-4.52834	-4.36934	-4.35125	-3.756	-3.76048	-4.16753	0.89871	-2.95087	0.314446	0.0446591	0.324735
Q9CRB6	Tubulin polymerization-promoting protein family member 3	Tppp3	0.297942	0.2225	-0.224041	-0.419483	0.454689	-0.492577	-0.0696568	-0.0997136	-1.29749	-1.5367	-0.491577	-0.659923	-0.575341	-0.545431	-1.5133	0.561008	0.965422	0.0174776	0.327996
Q91WC0;F2Z420	Histone-lysine N-methyltransferase setd3	Setd3	-0.208669	0.249669	-0.112597	0.0297132	-0.243113	-0.320878	-0.156301	0.163335	-0.666951	-0.499096	-0.39035	-0.468402	0.0327408	-0.858948	-0.103062	-0.372962	0.431752	0.00822994	0.329036
B2RX12;A0A0R4J015;P70170;E9PUE8	Canalicular multispecific organic anion transporter 2;ATP-binding cassette sub-family C member 9	Abcc3;Abcc9	-0.209288	0.257705	-0.0362981	-0.0524354	0.0299315	-0.225172	1.01507	0.211197	0.577647	0.141447	0.615523	0.234525	0.314069	0.291523	0.756579	1.2968	0.364757	0.0452022	0.329416
Q9CZN8	Glutamyl-tRNA(Gln) amidotransferase subunit A, mitochondrial	Qrsl1	-0.566381	-0.550724	-0.0782145	0.761102	0.0912708	-6.81229	0.833457	0.836181	-6.81229	-6.81229	-6.81229	-6.81229	-6.81229	3.13443	-1.46994	-6.81229	0.751332	0.00615864	0.33269
Q61490;E9Q3Q6;E9Q4G8;F6QH25	CD166 antigen	Alcam	0.25146	0.135383	-1.88054	0.52569	0.265094	-0.473424	0.38579	-0.723301	1.54833	1.694	1.87494	1.63246	1.42451	2.01997	2.29922	1.75608	0.897062	0.000297035	0.33495
B1AR13;Z4YKM2;B2RWE3	CDGSH iron-sulfur domain-containing protein 3, mitochondrial	Cisd3	-0.0269992	0.0638047	-0.0901395	0.0480826	0.383271	0.121231	0.13198	-0.129942	-0.674475	-0.766971	-1.27179	-1.0989	-1.6406	-0.891439	-0.0534907	-0.021697	0.274711	0.000139211	0.336919
Q60710;F6TVP2;E9PYG9	Deoxynucleoside triphosphate triphosphohydrolase SAMHD1	Samhd1	-0.296157	0.0169907	0.0889533	0.150736	0.160725	0.0257273	0.307624	2.44324	1.52506	1.82975	1.94359	1.91502	2.05878	1.75224	2.96864	1.66327	0.308517	3.47349e-05	0.351465
Q3UVG3	Protein FAM91A1	Fam91a1	0.0367575	0.129674	-0.0876262	-0.0906834	-0.186257	-0.466822	0.49813	-0.114598	-0.225605	-0.641497	-0.0844733	-0.264565	-0.281448	-0.666008	0.388992	0.264061	0.923427	0.0485607	0.352067
Q9QZM0	Ubiquilin-2	Ubqln2	-0.270876	-0.0367523	0.128372	0.141796	-0.178204	-0.111302	-0.48197	-0.33563	-1.27679	-1.13975	-0.0664717	-0.765548	-0.708422	-0.406255	-0.620874	0.000828966	0.0754962	0.0287886	0.353761
Q9QYC7	Vitamin K-dependent gamma-carboxylase	Ggcx	0.383191	-0.158346	-0.367544	0.0350943	-0.535078	-7.88163	0.447726	-0.531958	-7.88163	-7.88163	-7.88163	-7.88163	-7.88163	-7.88163	-1.89431	-7.88163	0.337436	0.000121437	0.355918
P15209;A0A286YDA0;A0A286YCV8;A0A286YDA3	BDNF/NT-3 growth factors receptor	Ntrk2	-1.64556	0.390667	0.479789	-0.0367656	0.116747	-0.255118	-0.0683581	-0.288091	-8.15962	-8.15962	-8.15962	-8.15962	-8.15962	-2.76154	-8.15962	-8.15962	0.772204	0.00650389	0.355918
Q6NT99	Dual specificity protein phosphatase 23	Dusp23	0.556897	0.196127	0.465291	-8.54188	0.788852	-8.54188	0.124381	-8.54188	-8.54188	-8.54188	-8.54188	-8.54188	-8.54188	-8.54188	-8.54188	-0.200582	0.608682	0.026011	0.355918
Q6ZQA0;F6ZZB1;F6VTL9;A0A0G2JFQ4;E9Q9L6	Neurobeachin-like protein 2	Nbeal2	0.41605	0.17807	-5.73272	0.599847	-5.73272	-5.73272	-5.73272	-5.73272	-5.73272	-5.73272	-5.73272	-5.73272	-5.73272	-5.73272	0.19286	-5.73272	0.0267276	0.0267276	0.355918
P41778;O35984;Q3UR63;V9GXB8	Pre-B-cell leukemia transcription factor 1;Pre-B-cell leukemia transcription factor 2	Pbx1;Pbx2	0.0986192	-7.06063	0.740474	0.323124	0.18388	-7.06063	-7.06063	-7.06063	-7.06063	-7.06063	-7.06063	-7.06063	-7.06063	-7.06063	0.287604	-7.06063	0.16755	0.0309812	0.355918
Q8K2C7	Protein OS-9	Os9	-0.699055	0.396688	-0.103331	0.184803	-0.158925	0.234555	1.1302	-0.221901	-0.701248	-0.685672	-1.51999	-0.812756	-1.39583	-0.485887	-0.707689	0.0893923	0.449448	0.0303051	0.362156
P07309	Transthyretin	Ttr	0.315129	0.17072	0.0186807	-0.696134	0.0949783	-2.47831	0.461109	-1.44622	-1.09121	-0.962077	-1.24008	-1.80284	-1.19899	-1.23697	-0.500683	-1.13907	0.453343	0.00721128	0.363679
Q9CR27;S4R1P7;G3UWG7;S4R287	WASH complex subunit CCDC53	Ccdc53	-6.89716	-6.89716	1.99089	-6.89716	2.75192	3.0974	2.7068	2.63402	1.72201	3.21901	2.60952	3.72934	4.0271	3.61548	2.71206	3.12508	0.00174944	0.0252243	0.364766
Q9WVM3;D3YU58	Anaphase-promoting complex subunit 7	Anapc7	0.252968	-0.0414108	-0.135893	-0.110085	0.554536	-0.595681	0.121519	-1.99651	-8.64539	-0.53544	-8.64539	-8.64539	-8.64539	-0.852567	-0.646711	-1.46911	0.642064	0.00414036	0.371858
Q61166	Microtubule-associated protein RP/EB family member 1	Mapre1	0.0854503	0.0595975	-0.0763792	-0.0764763	-0.0606686	-0.156704	-0.294045	-0.089763	-0.235246	-0.52012	-0.209974	-0.444951	-0.426505	-0.30655	-0.142899	-0.137415	0.0679839	0.00591533	0.374544
P63015	Paired box protein Pax-6	Pax6	-0.201174	0.202303	0.0402899	-0.072022	0.089873	-0.172492	-0.19652	-0.090663	-1.36276	-0.968353	-1.24044	-1.03178	-1.32841	-0.904558	-0.466214	-1.16366	0.453847	0.000168891	0.383513
Q99PM3	Transcription initiation factor IIA subunit 1;Transcription initiation factor IIA alpha chain;Transcription initiation factor IIA beta chain	Gtf2a1	-0.172289	-0.369698	0.504374	-0.120115	-0.218713	-0.525267	0.602086	-0.139781	-10.1095	-0.687823	-10.1095	-0.948938	-10.1095	-0.769977	-0.903394	0.0269784	0.983137	0.0170526	0.383851
Q91VH6;A0A3F2YNL8;A0A3B2W4I2;A0A3B2W7C9	Protein MEMO1	Memo1	-1.00195	0.434078	-0.33443	0.43992	-0.446223	-1.03517	-1.2357	0.623369	-1.01648	-1.5161	-0.802355	-1.3401	-1.16382	-1.90263	-0.332165	-0.193142	0.564595	0.0464997	0.384611
P63325	40S ribosomal protein S10	Rps10	0.0596705	-0.493889	-0.372492	0.560927	-0.637766	0.405502	-0.298363	-0.657018	-1.30101	-1.43045	-1.04671	-0.843502	-1.41927	-1.67835	-0.403227	0.0105849	0.561133	0.0225611	0.387178
O35604	Niemann-Pick C1 protein	Npc1	-0.47703	0.738209	-0.337912	-0.282341	0.147655	0.0881141	-0.0116861	0.223935	-7.69943	-0.893099	-7.69943	-7.69943	-1.20797	-7.69943	0.640843	-7.69943	0.728067	0.0162453	0.389499
Q9WV32;Q91Z25	Actin-related protein 2/3 complex subunit 1B	Arpc1b	0.187187	-0.188913	-0.0636945	0.0389713	-0.119249	-0.210241	0.0486421	0.0382619	-0.151563	-0.442191	-0.565462	-0.681256	-0.118423	-0.503675	-0.340729	-0.328596	0.598855	0.0173175	0.390003
Q8C3F2	Constitutive coactivator of PPAR-gamma-like protein 2	Fam120c	-0.256533	0.490583	-0.735003	0.210481	0.349907	-0.538464	0.408591	-0.811465	-0.990556	-1.50251	-1.5471	-7.49433	-7.49433	-1.102	-0.103874	-0.708107	0.898866	0.0144952	0.390992
P62835;A0A0G2JE52;A0A0G2JDL9	Ras-related protein Rap-1A	Rap1a	-0.0686053	0.0720764	-0.0151605	0.00815041	0.29485	0.191882	-0.0860368	-0.360151	-0.0859921	-0.157835	-0.336698	-0.306509	-0.423436	0.0663245	0.161785	-0.205136	0.833568	0.0142822	0.391604
Q8CD15;D3YTU3	Bifunctional lysine-specific demethylase and histidyl-hydroxylase MINA	Mina	0.0279113	-0.459848	0.0913727	0.248558	-0.111329	-0.00313628	0.504501	0.0576	0.359938	0.740047	0.575305	0.481493	1.12752	0.160418	0.451745	1.19218	0.53975	0.0112401	0.392843
Q8CB67;F6XYG6;F7AX87;D3Z3A7;D3Z2B1	Low-density lipoprotein receptor-related protein 11	Lrp11	-0.0368898	0.00913269	0.264153	-0.289889	-0.863144	0.119863	-0.361776	0.147628	-7.54542	-7.54542	-1.3558	-7.54542	-7.54542	-0.91447	-0.968237	-7.54542	0.470196	0.000356841	0.397788
Q9JLC8;E9QNY8;B2RRL5;D3Z3H1;A0A0R4J125	Sacsin	Sacs	0.185378	-0.179166	-0.221659	0.166193	0.117363	0.183349	-0.32333	-0.0611471	0.25422	0.574093	1.12951	0.487286	1.19828	0.838268	0.484722	0.862326	0.960327	0.0475042	0.398747
Q80VP0	Tectonin beta-propeller repeat-containing protein 1	Tecpr1	0.107857	-0.445355	-0.124857	0.345822	0.252826	-0.324223	-0.0125389	0.213884	-0.880659	-0.73721	-1.40604	-0.617252	-0.572255	-0.458177	-0.0451391	-1.60537	0.816313	0.0121437	0.39899
Q9D2Y4	Mixed lineage kinase domain-like protein	Mlkl	-0.756389	0.58213	0.596513	-1.32587	-0.00322078	0.403539	-0.245964	0.401607	2.07058	2.37545	2.49291	2.1791	2.68202	2.49923	2.06958	2.40977	0.715887	0.000110714	0.400351
Q9WUM3	Coronin-1B	Coro1b	-0.130587	-0.00385601	0.205188	-0.0948452	-0.00887396	0.260971	0.109787	-0.336742	0.151877	0.138709	0.258349	0.225143	0.392235	0.205701	0.118016	0.286204	0.881313	0.0489817	0.401491
Q9D8S4	Oligoribonuclease, mitochondrial	Rexo2	0.104063	-0.191539	0.0731583	-0.00358848	-0.64702	-0.13398	-0.139873	-0.26273	-0.415505	-0.151753	-0.325512	-0.115752	0.294853	-0.251529	-0.647635	0.255632	0.0632257	0.0410079	0.407009
A0A087WNS9;A0A087WQ65;A0A087WRZ2;A0A087WNT2;A0A087WPY4;Q64253	Lymphocyte antigen 6E	Ly6e	0	0	0	0	0	0	0	0	12.8945	12.4618	12.5931	12.558	12.7761	13.1935	12.6001	12.5523	#DIV/0!	6.07514e-06	0.409408
Q921E6;A0A5F8MPX8;A0A140LIG5	Polycomb protein EED	Eed	0.350698	-0.118823	-0.378564	0.0491862	0.179004	0.0664646	0.25649	0.757558	0.65209	0.923619	0.553019	0.492984	0.562174	0.74043	1.06451	0.763806	0.18923	0.00856983	0.413247
Q07417	Short-chain specific acyl-CoA dehydrogenase, mitochondrial	Acads	-0.13089	0.105037	0.205541	-0.220796	-0.135781	0.219408	-0.00674068	0.742126	0.598519	0.581025	0.876026	0.136572	1.0683	0.850289	0.895642	0.140416	0.352189	0.0261173	0.414566
P25799	Nuclear factor NF-kappa-B p105 subunit;Nuclear factor NF-kappa-B p50 subunit	Nfkb1	-7.06568	-0.0666679	1.17242	-0.351456	-0.0184026	-7.06568	0.973135	-0.535261	1.68361	1.68784	2.31708	2.13454	2.32636	2.22828	2.0399	1.92293	0.891419	0.00369305	0.421126
Q9R0D8;D3Z394	WD repeat-containing protein 54	Wdr54	0.113079	0.362166	0.352191	-1.48757	-1.69145	-1.74584	0.180635	0.655427	-1.71904	-1.7695	-1.94052	-1.08323	-0.109659	-2.74973	-1.50223	-1.02316	0.672659	0.0248886	0.421893
E9Q8D0		Dnajc21	-0.0774683	0.0519468	0.495775	-0.723705	-0.249	0.5112	-0.306071	-0.025483	-2.63481	-0.554288	-10.182	-0.884121	-1.00468	-1.10751	-0.187095	-1.9937	0.949066	0.0291969	0.423225
Q99LH1	Nucleolar GTP-binding protein 2	Gnl2	0.12279	-0.213145	-0.0457078	0.11062	0.480885	-0.845156	0.471833	-0.644996	-0.091922	-2.59753	-3.37355	-0.598383	-0.0991576	-0.148286	-0.984317	-1.4659	0.982639	0.0426395	0.426622
Q9JJK5;Q8C4N0	Homocysteine-responsive endoplasmic reticulum-resident ubiquitin-like domain member 1 protein	Herpud1	-0.715066	-0.211079	0.454621	0.209776	-0.506747	0.495887	0.677937	0.729454	-0.852436	-0.782264	-9.21617	-2.07348	-9.21617	-0.561314	-0.865331	-0.0151136	0.2597	0.0230031	0.428176
P55096;A0A0G2JDI9	ATP-binding cassette sub-family D member 3	Abcd3	-0.129268	0.194774	0.106557	-0.210056	-0.799374	-0.0172215	-0.00418027	-0.0640292	-0.654568	-0.609895	-1.03639	-0.225407	-0.543751	-0.47937	-0.654367	-0.0951569	0.357985	0.0144546	0.428576
Q69Z37;E9PX59	Sterile alpha motif domain-containing protein 9-like	Samd9l	-3.83866	-3.83866	1.43651	0.206097	-0.270975	-3.83866	3.07077	1.80746	6.30409	6.39649	6.72744	6.19244	6.39346	6.58389	6.73941	6.41837	0.30991	2.27338e-05	0.431639
Q921G7;Q6PF96	Electron transfer flavoprotein-ubiquinone oxidoreductase, mitochondrial	Etfdh	0.0747714	0.0688157	-0.0514548	-0.10007	0.34295	0.383372	-0.11288	0.175464	0.361995	0.0539045	0.189021	0.393242	0.195826	0.361968	0.234738	0.62547	0.136492	0.0342201	0.431974
Q8VEH6	COBW domain-containing protein 1	Cbwd1	-1.022	0.187716	0.137065	0.343626	1.61222	0.307186	0.410693	0.0515453	0.974153	1.26975	0.514378	0.539519	0.410802	0.609674	1.6183	1.64701	0.231	0.0312782	0.435376
P05132	cAMP-dependent protein kinase catalytic subunit alpha	Prkaca	-0.2359	0.452003	-0.0917756	-0.243763	-0.136269	-0.462115	-0.220858	-0.28799	-0.411739	-0.654566	-0.625822	-0.791007	-0.630978	-0.389667	-0.728717	-0.328238	0.235959	0.0368373	0.435462
Q9Z0K8	Pantetheinase	Vnn1	-0.0565812	-0.0167936	0.373147	-0.405722	-0.361533	-0.510945	0.468095	-0.199692	0.354667	0.508896	0.579678	0.193183	0.244087	1.06748	0.113535	0.884825	0.738308	0.0489684	0.435502
Q61635		Ifi47	0.334131	1.07182	-2.30862	-1.19945	-0.427898	-0.107161	1.37203	-9.11212	5.53992	5.48994	5.95455	5.4972	5.96373	5.49373	5.58122	6.02377	0.928103	2.33811e-05	0.436246
P11928;Q8K469;Q05BJ7	2-5-oligoadenylate synthase 1A	Oas1a;Oas1g	0	0	0	0	0	0	0	8.7309	13.736	13.5933	13.7772	13.8735	13.6863	13.6811	14.0975	13.8841	0.355918	2.64567e-07	0.436541
Q8BSP2;E9PY48	Condensin-2 complex subunit H2	Ncaph2	0.469112	-0.26249	-0.898954	0.317094	-1.0505	0.766249	0.906606	0.0454722	0.764744	0.416339	0.853931	1.00925	0.633431	0.776112	0.764321	1.77778	0.493545	0.0249957	0.442278
Q8R2Q8	Bone marrow stromal antigen 2	Bst2	-6.46396	1.98769	-6.46396	-6.46396	-6.46396	-6.46396	-6.46396	-6.46396	7.47949	7.65991	7.65943	7.44643	8.15569	6.94723	7.79876	7.9028	0.355918	2.7273e-07	0.448011
E9QMC1;A0A5F8MPT6;P59242;D3YUW7	Cingulin	Cgn	-0.26973	0.0206336	0.279166	-0.0852409	-0.0959881	-0.152567	0.205433	-0.0607745	1.27384	1.19854	1.1975	1.43102	1.53676	1.14189	1.21092	1.58665	0.897669	2.66303e-05	0.44845
Q9DAK9	14 kDa phosphohistidine phosphatase	Phpt1	-0.210825	0.158381	0.146255	-0.13095	-0.798616	-0.214927	-0.367501	-0.647876	-0.443777	-0.429104	-0.208558	-0.157652	0.224681	-0.331766	-0.467655	-0.160107	0.0203999	0.0490164	0.451909
Q03517;Q4W8U9	Secretogranin-2;Secretoneurin;Manserin	Scg2	-0.119637	0.154449	-0.0424951	-0.00634748	0.0058546	0.507622	-0.42993	0.451869	-0.690426	-0.574437	-0.418502	-0.198261	-0.523903	-0.0825826	-0.493802	-0.298329	0.448504	0.00721444	0.457354
O35657	Sialidase-1	Neu1	-0.113878	0.124404	0.00898179	-0.0297397	0.376206	0.597023	0.208718	-0.38325	-0.566859	-0.79665	-1.01964	-1.15046	-1.16776	-0.592108	-0.833438	-0.308432	0.297909	0.000295836	0.469282
P25976;A2AWT6;A2AWT7;A2AWT5	Nucleolar transcription factor 1	Ubtf	0.260064	-0.0520994	0.0957555	-0.378361	-0.0301601	0.0187368	-0.390511	-0.142289	-0.355857	-0.233505	-0.5513	-0.848904	-0.477443	-0.309087	-0.379208	-0.366485	0.455432	0.043581	0.481258
O08553	Dihydropyrimidinase-related protein 2	Dpysl2	-0.00408067	-0.256233	0.12853	0.100808	-0.0366902	-0.212518	0.0311353	-0.212665	-0.280624	-0.373647	-0.19242	-0.218388	-0.147193	-0.4271	-0.168434	-0.0910265	0.364094	0.0362729	0.482846
P48678	Prelamin-A/C;Lamin-A/C	Lmna	-0.0776146	-0.10436	0.179893	-0.0154326	0.0955387	0.189501	0.107928	0.026261	0.256457	0.332365	0.531842	0.315149	0.722448	0.397086	0.289281	0.360396	0.195647	0.00723443	0.485194
Q9R0Q1	Synaptotagmin-like protein 4	Sytl4	-0.0605032	-0.0332249	0.0158232	0.0742435	0.328939	0.123433	0.0953155	0.0732886	-0.252798	-0.594242	-0.341561	-0.525559	-0.200823	-0.506597	-0.49514	-0.155999	0.0643756	0.00148249	0.485822
P14148;F6XI62	60S ribosomal protein L7	Rpl7	-0.106444	-0.148773	-0.293063	0.436098	-0.00931695	-0.176362	0.264333	-0.26821	-0.476102	-0.324207	-1.12471	-0.845637	-0.77382	-0.630123	-0.133548	-0.515104	0.88195	0.0422383	0.487746
Q4VBD2	Transmembrane anterior posterior transformation protein 1	Tapt1	0.33413	-0.245901	-0.0064306	-0.151135	-8.26276	-0.451768	1.29467	1.35593	-0.583947	-8.26276	-8.26276	-0.933074	-1.02263	0.170559	-8.26276	-1.22159	0.521766	0.0118463	0.488976
Q9QXY9;E9QA46	Peroxisomal biogenesis factor 3	Pex3	-0.0864646	0.358857	-0.0896333	-0.258423	0.0488927	-0.173989	-0.478246	-0.549243	-1.3057	-0.847731	-9.95937	-2.27453	-0.24402	-1.1846	-1.02278	-9.95937	0.229582	0.00380271	0.496796
P45376	Aldose reductase	Akr1b1	-0.140441	-0.0931434	0.168713	0.0443588	-0.00675429	0.0807411	-0.0100742	-0.0357896	0.124914	0.251244	0.310143	0.137224	0.241464	0.289894	0.118721	0.369479	0.921657	0.0437478	0.497916
Q6NXK8	Acid-sensing ion channel 1	Asic1	-0.23346	0.193152	0.170433	-0.183192	0.120904	0.137614	0.767283	0.10201	-7.67751	-0.23146	-7.67751	-7.67751	-7.67751	-0.423927	0.154625	-7.67751	0.212281	0.0132616	0.499709
O09172;A0A0G2JDI4;H3BJA3	Glutamate--cysteine ligase regulatory subunit	Gclm	0.170106	0.0707226	-0.052107	-0.217441	-0.365727	0.118541	0.133215	0.454211	0.362612	0.228701	0.442751	0.750591	0.61	0.513107	0.535282	0.504382	0.562763	0.022967	0.50045
Q8BGS2	BolA-like protein 2	Bola2	-0.0149852	0.135351	0.385497	-0.723411	0.799658	0.659432	0.608031	0.636221	0.975008	0.627173	0.666753	1.04077	0.778789	1.02859	0.844215	1.03531	0.00820562	0.00698333	0.500934
A0A286YDK2;Q91VC9	Growth hormone-inducible transmembrane protein	Ghitm	0.432524	-0.106247	-0.233257	-0.199764	0.0607636	0.767141	0.0976775	0.425075	1.41837	1.14889	0.883453	1.54931	1.05171	1.71743	1.46738	1.33885	0.184865	0.00184572	0.502825
P28658	Ataxin-10	Atxn10	0.0867189	0.164909	-0.00252636	-0.28859	0.00922664	0.0250591	-0.334282	0.0227006	-0.534789	-0.281384	-0.378291	-0.440912	-0.430857	-0.451197	-0.315713	-0.222445	0.642714	0.013668	0.504412
Q61578	NADPH:adrenodoxin oxidoreductase, mitochondrial	Fdxr	0.0616493	-0.0506179	0.0269559	-0.0410326	0.884798	0.397387	0.75787	0.153494	0.311624	0.236134	0.585189	0.351646	0.386979	0.268123	0.294222	1.025	0.0272287	0.00625686	0.51816
P29477	Nitric oxide synthase, inducible	Nos2	1.86843	-6.90566	-1.59083	-6.90566	-2.42023	-6.90566	-2.52534	-6.90566	3.5946	2.54338	3.16597	3.69247	2.31515	3.77194	3.99511	3.71457	0.347341	0.00283187	0.52005
Q9Z0E6	Interferon-induced guanylate-binding protein 2	Gbp2	0.829761	0.102355	-0.564169	-1.08088	-2.47116	-1.84714	-1.78375	2.15508	7.43776	7.96137	7.64031	7.81368	7.69566	7.86636	7.49838	8.31177	0.791926	1.33463e-05	0.521701
P08553;A0A0R4J036;D3YZ35	Neurofilament medium polypeptide	Nefm	-0.142851	0.113758	0.00176855	0.0157867	0.177748	0.171904	0.0495067	0.112029	-0.480185	-0.283366	-0.304847	-0.351316	-0.0292514	-0.442938	-0.276569	-0.408636	0.071317	0.00237386	0.525842
Q8CGB9;Q9JHR7	Insulin-degrading enzyme	Ide	0.140086	0.0457604	-0.0841239	-0.116465	-0.194601	0.070289	-0.104278	-0.583251	-0.327438	-0.471459	-0.623317	-0.28538	-0.439392	-0.267502	-0.390485	-0.374335	0.232229	0.00432833	0.535316
Q3UW53;E9PYV4	Protein Niban	Fam129a	0.17276	-0.136529	0.131299	-0.204562	-0.0945598	-0.0864905	0.213712	-0.442539	0.182024	0.457443	0.540735	0.236739	0.319898	0.340526	0.516237	0.51732	0.620439	0.029802	0.544763
Q9Z1Q5	Chloride intracellular channel protein 1	Clic1	-0.0377876	0.0883766	0.055501	-0.11488	-0.152481	-0.130446	0.033738	-0.141964	0.506565	0.464996	0.59303	0.43667	0.866996	0.631457	0.235297	0.548809	0.188216	0.000107569	0.547638
Q9D115	Zinc finger protein 706	Znf706	0.236853	-0.527591	-0.222486	0.345716	-13.5731	-0.115959	-0.979742	-13.5731	-13.5731	-1.1181	-13.5731	-13.5731	-13.5731	-1.38339	-13.5731	-0.918537	0.0489409	0.00249757	0.548078
Q64511	DNA topoisomerase 2-beta	Top2b	0.0567354	0.562608	-0.550119	-0.321946	-0.447001	0.153717	-0.459084	-0.694989	-2.77179	-0.657444	-1.32892	-2.34449	-1.60895	-1.09304	-0.152536	-2.59063	0.364581	0.0195576	0.550562
P70398;Q4FE56	Probable ubiquitin carboxyl-terminal hydrolase FAF-X;Ubiquitin carboxyl-terminal hydrolase	Usp9x	-0.0266199	-0.0130819	0.102017	-0.0678847	0.0465914	0.0541521	-0.042445	-0.116369	-0.203672	-0.231722	-0.00604387	-0.327233	0.194273	-0.429704	-0.215165	0.0136367	0.821699	0.0483008	0.551605
Q99MA9	Homeobox protein Nkx-6.1	Nkx6-1	0.0234097	-0.0993438	-0.0820553	0.144664	0.536907	0.00231479	0.582014	-10.2716	-1.3574	-0.523875	-0.543208	-10.2716	-1.74734	-0.117043	-10.2716	0.566409	0.972755	0.0162597	0.551742
Q8BXR1;D3YY38	Probable cationic amino acid transporter	Slc7a14	-0.0812651	0.151277	0.136543	-0.243059	-0.0359854	0.0663014	0.13545	0.0253588	-0.888027	-1.46703	-1.32452	-0.919104	-0.851002	-1.15417	-1.3214	-0.779258	0.633548	0.000448946	0.554461
Q8BGG0	Zinc transporter 8	Slc30a8	-1.07726	0.426816	0.485	-0.354348	0.556269	0.475495	-1.15384	-1.49331	-3.31441	-3.12446	-3.09323	-12.0908	-2.72487	-2.16456	-3.44522	-12.0908	0.829908	0.00664376	0.564025
P18340	C-X-C motif chemokine 9	Cxcl9	0	0	0	0	0	0	0	0	13.6501	13.6271	13.9283	13.67	14.3304	13.793	13.2154	13.9283	#DIV/0!	1.14058e-06	0.567684
Q8K094		Pvr	0.120072	0.440637	-0.098121	-0.685574	0.105231	0.783519	-0.696663	-0.512761	0.296187	1.10285	1.13133	1.44807	-0.143651	1.44962	1.93365	1.27667	0.925519	0.0212982	0.579888
Q99JT9	1,2-dihydroxy-3-keto-5-methylthiopentene dioxygenase	Adi1	-0.131658	-0.0916947	-0.0175843	0.21526	0.219836	0.21959	0.00720976	-0.344679	-0.497479	-0.599463	-0.697724	-0.568357	-0.755621	-0.568507	-0.518113	-0.311246	0.782706	0.00128264	0.582135
A0A1D5RMI8;Q8K4E0	Alstrom syndrome protein 1 homolog	Alms1	-4.48213	-4.48213	0.905642	1.02654	1.35131	-4.48213	1.71786	1.16516	1.54647	1.4469	2.12525	1.47308	2.49959	1.44935	1.67727	1.59166	0.290326	0.0175704	0.582703
P50543	Protein S100-A11	S100a11	0.00861503	-3.80234	0.907185	0.066193	-10.7346	0.450654	-10.7346	1.4155	1.69034	1.98767	2.33556	2.07673	2.52881	1.88842	1.95808	2.16429	0.990839	0.00103374	0.585439
O88792	Junctional adhesion molecule A	F11r	-0.165901	0.223441	0.114288	-0.21982	-1.54208	-0.527557	0.0164452	0.248011	1.59472	1.0766	1.70342	1.19277	1.09295	1.70524	1.69949	1.53363	0.377014	0.00116146	0.593605
A0A2R8W6P0;A0A2R8VK70;A0A2R8VI30;Q61735	Leukocyte surface antigen CD47	Cd47	-0.860412	-0.779408	-0.708404	1.17287	-0.300698	-0.587465	0.786368	-0.884345	1.56186	0.715063	2.24905	1.73744	2.27114	1.08377	2.67961	1.07807	0.901724	0.029646	0.59487
E9PYP8;Q9WVJ5	Beta-crystallin B1;Beta-crystallin B1B	Crybb1	-0.830048	-0.118021	0.303876	0.357925	0.0301433	-0.348574	0.424639	-0.985974	-0.988831	-0.601832	-1.36813	-0.555004	-0.0657164	-1.21045	-0.684643	-0.948703	0.734111	0.0493707	0.599059
Q9CQT1;F6YY88	Methylthioribose-1-phosphate isomerase	Mri1	0.00262762	0.00122583	0.165524	-0.191403	0.247843	0.11083	0.226068	-0.203015	0.246737	0.223384	0.379694	0.201359	-0.21925	0.117325	0.566302	0.901098	0.421985	0.0160913	0.607806
P70677	Caspase-3;Caspase-3 subunit p17;Caspase-3 subunit p12	Casp3	-0.00987021	0.00186095	0.0966712	-0.0950743	-0.138025	0.106797	0.245464	0.173744	0.557728	0.35273	0.600265	0.764663	0.750992	0.485504	0.462237	0.840665	0.297555	0.00165391	0.612198
E9PZ87		Pappa2	0.0308847	0.13508	-0.0707424	-0.107711	0.571121	0.23966	0.267085	0.281185	-2.41619	-2.61683	-2.25598	-2.59132	-2.24877	-2.01535	-2.95623	-2.35998	0.0157564	8.53034e-07	0.624229
Q9JIS5	Synaptic vesicle glycoprotein 2A	Sv2a	-0.24493	0.134384	0.229737	-0.174787	0.00775194	0.101621	-0.0366597	0.211417	-0.330138	-0.26151	-0.37799	-0.356538	-0.538097	-0.407669	-0.283379	0.150018	0.577617	0.0450363	0.624552
Q9D1L0;B2RPU8;D3Z5B1	Coiled-coil-helix-coiled-coil-helix domain-containing protein 2	Chchd2;Zbed5	-0.0862304	0.225267	0.229169	-0.480224	-0.231823	-0.331807	-0.306177	-0.142329	-0.457524	-0.624211	-0.53623	-0.445857	-0.644995	-0.452823	-0.551706	-0.234557	0.201975	0.0349108	0.626844
Q99MU3	Double-stranded RNA-specific adenosine deaminase	Adar	0.304342	-1.11642	-6.26071	1.19589	-0.94975	1.12404	-0.823874	-1.34693	1.47957	2.74453	2.91977	3.26149	3.28322	3.25851	2.34071	2.59789	0.899538	0.00953018	0.630308
Q9JIX0;A0A2I3BRK6	Transcription and mRNA export factor ENY2	Eny2	0.0285179	0.137273	-0.0997203	-0.0785664	-0.0516122	0.168047	0.267207	0.457493	-0.567006	-0.309173	-0.107395	-0.705691	-0.84008	0.00750964	-0.216712	-0.26851	0.124673	0.0225177	0.638334
P98063	Bone morphogenetic protein 1	Bmp1	0.256189	0.868505	-1.02061	-1.038	-0.586894	-1.00068	-6.60333	-6.60333	-1.26162	-6.60333	-6.60333	-6.60333	-1.96452	-6.60333	-1.09811	-6.60333	0.100751	0.0388581	0.639215
Q9DAM7	Transmembrane protein 263	Tmem263	-0.0267769	-0.00666774	0.0817627	-0.0518627	0.059945	-0.333757	0.403569	-0.565365	-0.538269	-0.576299	-0.230475	-0.56692	-0.721796	-0.419554	-0.114957	-0.399269	0.784756	0.00118615	0.650822
Q6XE40;O88910	MAGUK p55 subfamily member 3	Mpp3	-0.766028	-0.479379	0.413076	0.446953	-0.476837	-0.999705	0.595441	0.0764789	-8.07065	-1.68753	-8.07065	-0.939152	-8.07065	0.119387	-1.79126	-8.07065	0.86265	0.0161987	0.651096
P21995	Embigin	Emb	0.241355	0.0574074	0.0276935	-0.399878	0.00617262	-0.129423	0.0434463	0.0876503	-0.535608	-1.20855	-0.935135	-0.593101	-0.865886	-0.470024	-0.370451	-1.15803	0.97619	0.00755107	0.651668
Q91WG4	Elongator complex protein 2	Elp2	-0.323114	0.0390252	0.162526	0.0758653	0.140785	-0.0746286	-0.0726937	-0.921012	-0.526865	-0.20179	-0.414787	-0.36545	-0.880983	-0.527761	0.0773355	0.0742196	0.440042	0.0275816	0.652846
P63239	Neuroendocrine convertase 1	Pcsk1	0.193843	0.246065	0.169755	-0.874726	0.213329	0.506942	0.177005	0.134758	0.35956	0.986137	1.11406	0.917361	1.22595	0.813763	0.826836	0.917525	0.276984	0.0145373	0.653851
Q3U5F4;G8JL83	YrdC domain-containing protein, mitochondrial	Yrdc	0.237083	0.34589	0.626999	-7.355	0.343785	0.804677	0.534223	0.276747	1.61347	2.47458	1.48896	1.02257	3.09688	1.78389	0.604366	1.64253	0.289926	0.030009	0.65689
P54276	DNA mismatch repair protein Msh6	Msh6	0.0153427	-0.0274977	0.0741228	-0.0657217	-0.197497	-0.074698	0.0524025	-0.623575	-0.499818	-0.684786	-0.0186126	-0.617369	-0.289943	-0.0834637	-0.607383	-0.432752	0.200818	0.0242003	0.661391
E9Q6R4;E9Q4N7;A0A338P6U8;E9Q4N6		Arid1b	0.0382171	0.0378356	-0.732083	0.427122	-6.63879	-6.63879	0.154716	-0.457512	-1.17589	-0.144131	-6.63879	-6.63879	0.633847	-6.63879	-6.63879	-0.841529	0.13937	0.0459975	0.667151
Q3U5C8	Rho guanine nucleotide exchange factor 16	Arhgef16	-0.605359	-0.279517	0.363191	0.301655	0.115695	0.321676	0.671256	-2.2212	1.26326	1.74576	1.06565	0.26531	1.54515	1.398	0.614645	1.56681	0.91919	0.0361874	0.669237
P51175;A0A0A6YX50	Protoporphyrinogen oxidase	Ppox	0.18699	-0.252305	0.14944	-0.131437	0.28301	-0.119399	-0.212418	0.603474	0.571634	0.852231	0.134474	0.434019	-0.802993	1.07987	1.13579	0.656679	0.468578	0.0383504	0.669465
Q8CGC4;Q8BM41	Protein LSM14 homolog B	Lsm14b	-0.268717	-0.281097	0.173959	0.285494	0.574049	-0.222447	0.4302	-0.297358	-0.664157	-0.700001	-0.977694	-1.16457	-0.348552	-1.42488	-1.70185	0.0863132	0.547585	0.00671718	0.672274
Q8R5F7	Interferon-induced helicase C domain-containing protein 1	Ifih1	-4.85058	1.962	-4.85058	-4.85058	-4.85058	-4.85058	-4.85058	-4.85058	5.79148	5.60529	6.13161	5.54343	6.18052	5.69903	5.41996	6.11329	0.355918	5.64491e-05	0.672542
Q9CR89;A0A0N4SVK6;A0A0N4SVQ6	Endoplasmic reticulum-Golgi intermediate compartment protein 2	Ergic2	-0.830255	0.265676	0.137433	0.183232	0.561145	0.0115366	-0.465155	0.575095	-0.648056	-1.23563	-9.60615	-1.04456	-1.58533	-0.812587	-0.937553	-1.40161	0.491672	0.0224322	0.681407
P02340;Q80ZA1;I7HIK9;A0A158SIS7	Cellular tumor antigen p53	Tp53;Trp53	0.239319	-0.079803	-0.274337	0.0656374	0.363404	0.416416	0.200346	-0.152444	0.811599	0.929912	0.99264	1.02292	1.02962	0.596228	1.32338	0.992963	0.222522	7.7058e-05	0.682201
Q07832;A0A0U1RNM9	Serine/threonine-protein kinase PLK1	Plk1	0.586977	0.674772	-1.34558	-0.976916	-0.819007	-0.336243	-0.259526	-0.434728	-2.02132	-2.61344	-8.12597	-8.12597	-2.22813	-8.12597	-1.37191	-8.12597	0.442194	0.032735	0.68239
Q9JIK5	Nucleolar RNA helicase 2	Ddx21	0.0511424	0.049313	0.134867	-0.266816	-0.298284	-0.0328816	0.318559	0.143955	0.286317	0.32529	0.191646	0.707818	0.203288	0.550865	0.567174	0.463474	0.754908	0.0456648	0.682889
P23780	Beta-galactosidase	Glb1	0.048944	-0.26641	0.190569	-0.0102896	0.373413	0.0224303	0.253074	0.0364226	-0.458502	-0.398506	-0.366371	-0.121858	-0.522917	0.209358	-0.151069	-0.641438	0.20712	0.0376441	0.68365
Q9EQK5	Major vault protein	Mvp	0.113682	-0.0343443	0.13649	-0.247575	-0.00781996	0.00523167	0.0606167	0.331816	1.65704	1.63855	2.32961	1.87634	2.05846	1.76178	1.92235	2.16433	0.415909	0.000898725	0.683894
O55234;Q8BTY5	Proteasome subunit beta type-5	Psmb5	0.131179	-0.271468	0.30904	-0.255921	-0.274176	-0.177121	0.0224415	-0.0305152	-0.675063	-0.582429	-0.394714	-0.532942	-0.408751	-0.7175	-0.582884	-0.312383	0.527908	0.0241501	0.686253
Q9CPY7	Cytosol aminopeptidase	Lap3	-0.104057	0.25052	0.133323	-0.352669	-0.359743	0.112803	0.0248841	-0.255715	0.613462	0.639091	0.540524	0.492509	0.587993	0.468894	0.450883	0.937266	0.559479	0.00232319	0.691942
E9Q411		Nbas	-0.137096	0.125979	0.215348	-0.254254	0.504402	-0.464561	0.374217	0.341962	0.29346	0.233972	0.311899	0.2168	0.116013	0.260154	0.311008	0.477669	0.343146	0.0416594	0.696148
P04918	Serum amyloid A-3 protein	Saa3	0	0	0	0	0	0	0	9.09064	15.3745	15.8208	15.7579	15.9893	15.6831	15.8834	15.1951	16.4527	0.355918	2.32386e-05	0.697871
E9PVP1;A0A0G2JG52		Aim1	-0.855909	0.329378	0.632686	-0.642588	0.638773	0.336597	1.33463	0.392724	3.13051	3.37747	3.21751	2.90834	3.16875	3.23124	2.88429	3.58421	0.131085	1.71083e-05	0.703547
P60766	Cell division control protein 42 homolog	Cdc42	-0.0196569	0.0790578	-0.107467	0.0412266	-0.0158892	-0.109135	-0.200093	-0.000849	-0.157558	-0.188287	-0.389278	-0.17518	-0.0542131	-0.388812	0.0259967	-0.340284	0.239296	0.0135539	0.7048
Q8JZQ9	Eukaryotic translation initiation factor 3 subunit B	Eif3b	-0.0192733	-0.0912965	0.0754819	0.0298114	0.115566	0.0284434	0.0466864	-0.120075	0.189542	0.0659966	0.107738	0.119762	0.303006	-0.0458673	0.0277561	0.318858	0.749376	0.0311902	0.706244
P11672;A0A0A6YW77	Neutrophil gelatinase-associated lipocalin	Lcn2	0	0	0	0	0	0	0	0	11.7946	12.239	11.7247	11.8719	11.6298	11.5277	11.7074	12.9161	#DIV/0!	2.15893e-05	0.737267
Q9QZU9	Ubiquitin/ISG15-conjugating enzyme E2 L6	Ube2l6	-0.326643	0.0844209	0.18415	0.00891777	-0.489143	0.143789	-0.720671	0.0709018	3.32271	3.43636	3.88892	3.41125	3.75502	3.38425	3.13514	4.02709	0.393284	7.17625e-05	0.742103
Q9D2R6;E9Q6W2	Cytochrome c oxidase assembly factor 3 homolog, mitochondrial	Coa3	0.310182	-0.288755	-0.143905	0.0516671	-0.29777	-0.552688	-0.324344	-0.357171	-0.474127	-0.465604	-0.280608	-0.380752	-0.317099	-0.496274	0.323058	-1.01935	0.0532063	0.0437698	0.743967
P11214	Tissue-type plasminogen activator;Tissue-type plasminogen activator chain A;Tissue-type plasminogen activator chain B	Plat	-0.872873	-0.28344	0.253993	0.525878	-0.401021	0.270133	-0.648335	-0.385674	1.52363	1.18176	1.72181	0.869775	0.845749	1.30339	1.43511	2.03296	0.523361	0.00619787	0.744996
Q3U5Q7	UMP-CMP kinase 2, mitochondrial	Cmpk2	-0.324092	-1.82235	-0.620655	1.18146	-8.74313	-0.231042	-0.855283	-2.59042	5.96511	5.82121	5.78998	5.63765	6.0528	5.73197	5.79132	5.76699	0.250093	7.90197e-07	0.754691
Q9R0X4;Q32MW3	Acyl-coenzyme A thioesterase 9, mitochondrial;Acyl-coenzyme A thioesterase 10, mitochondrial	Acot9;Acot10	-0.0723595	-0.303508	-0.18461	0.442282	-0.18845	0.0739858	-0.846606	-0.0382563	0.65677	0.369134	0.704546	0.337017	0.724588	0.67285	0.522872	0.320284	0.442898	0.029777	0.755148
P13011;A0A494BAV5;P13516;Q99PL7	Acyl-CoA desaturase 2;Acyl-CoA desaturase 1	Scd2;Scd1;Scd3	-0.101539	-0.268686	0.374449	-0.0869014	0.890443	0.458273	0.670227	-0.262658	-1.48654	-1.68211	-12.8942	-1.99639	-4.52358	-1.41577	-1.72856	-4.30201	0.135236	0.00100367	0.761209
Q4VAA2;A0A087WNP6;A0A087WRM0	Protein CDV3	Cdv3	-0.0237998	-0.102286	0.0495217	0.0702296	0.331356	0.533149	0.337546	0.278365	0.136476	0.453139	0.671115	0.530295	0.714702	0.340978	0.546562	0.381008	0.00230753	0.01246	0.767748
P68368;A0A0A0MQA5	Tubulin alpha-4A chain	Tuba4a	0.00699375	0.285341	-0.183794	-0.158338	0.0751818	0.0516652	0.297657	0.213384	0.758121	0.215326	0.821977	0.366971	0.601539	0.450538	0.623753	0.74772	0.233431	0.0294556	0.774452
A0A0R4J065;Q8BGE6;D3YZP6	Cysteine protease ATG4B	Atg4b	0.29902	-0.433322	0.0875053	-0.0490002	-1.8226	-0.707446	0.270244	-0.569788	-0.633481	-0.384986	-0.394877	-0.664532	-0.8487	-0.746666	-0.171228	-0.188512	0.207342	0.0328016	0.775134
O35309	N-myc-interactor	Nmi	-0.729474	0.133407	0.219904	0.183123	0.183005	-1.41311	0.326389	1.81802	4.32761	4.40462	4.30497	4.49381	4.16076	4.1625	4.63936	4.6684	0.439889	7.34234e-08	0.777974
A0A0R4J256;P28076	Proteasome subunit beta type-9	Psmb9	1.35846	0.518673	-9.26526	-9.26526	-9.26526	-9.26526	-9.26526	1.62667	4.51149	4.37145	5.07936	4.04218	5.06619	3.79554	4.31726	5.06459	0.826496	0.000973867	0.786315
Q9EQH2	Endoplasmic reticulum aminopeptidase 1	Erap1	-0.381732	-0.393387	0.364914	0.242863	-0.263594	-0.187663	0.139607	-0.490996	2.76114	2.63589	2.82084	3.09586	2.95903	2.80037	2.79636	2.9123	0.485242	2.12426e-05	0.787901
O35892;D6RIJ4;E9Q4Y0;A0A1B0GX24;E9QA05;Q8C405	Nuclear autoantigen Sp-100	Sp100	0	0	0	0	0	0	0	0	8.25786	10.2435	10.0166	8.76295	9.77021	8.46087	9.67145	9.38292	#DIV/0!	0.0152422	0.789569
Q63850	Nuclear pore glycoprotein p62	Nup62	-0.0970266	-0.223117	0.0490634	0.231108	0.155391	0.210099	-0.154709	0.517743	0.351959	0.394529	0.505049	0.713338	0.653214	0.0958898	0.515336	0.819798	0.289258	0.00821809	0.791177
Q8BL66	Early endosome antigen 1	Eea1	-0.273608	0.172718	0.282937	-0.270725	0.201396	-0.0569128	-0.163331	-0.0362106	0.381816	0.634485	0.450174	0.300126	0.604834	0.30881	0.40412	0.56086	0.965513	0.0248537	0.791611
H7BWY8;Q8C8T8;Z4YL87	Pre-rRNA-processing protein TSR2 homolog	Tsr2	0.452836	-0.0593298	-0.210475	-0.308806	-0.886663	1.62926	-0.131592	-0.136563	-1.06666	-0.891524	-0.666013	-0.625858	-1.08215	-0.743141	-0.326589	-0.948723	0.563956	0.0184864	0.792371
O88809;Q9CXL6;Q6PGI2	Neuronal migration protein doublecortin	Dcx	0.0658167	0.0225683	-0.128823	0.0327774	-0.379909	-0.224131	0.0129449	-0.396089	-0.508354	-0.680549	-0.365228	-0.639324	-0.161166	-0.592874	-0.615925	-0.704065	0.0577423	0.000442639	0.79577
O08734;F7CUQ1;Q91WX5	Bcl-2 homologous antagonist/killer	Bak1	-6.47652	-6.47652	-6.47652	1.9878	2.25971	2.8163	2.1667	2.47201	4.04607	3.43212	2.94126	2.57534	3.73331	3.81915	3.32009	2.72877	0.00786008	0.010542	0.798526
P32261;A0A0A6YWH7	Antithrombin-III	Serpinc1	0.567663	0.586178	-0.831815	-1.13672	-0.481808	-0.135056	-2.19889	-1.94116	1.293	1.25699	1.66372	0.868741	1.19495	1.69511	1.2413	1.20761	0.20346	0.0102844	0.806905
Q02257	Junction plakoglobin	Jup	-0.00617455	-0.509961	0.0410011	0.348461	0.133605	-0.434878	-0.446644	-0.782127	-1.17766	-1.33969	-0.639573	-1.91615	-1.04752	-1.11613	-0.849931	-1.57224	0.233657	0.00704736	0.807421
P16332	Methylmalonyl-CoA mutase, mitochondrial	Mut	-0.94697	-0.256783	0.280337	0.515862	-0.808524	0.318925	-0.165133	-0.366009	-2.25892	-0.978432	-1.79076	-1.41733	-1.3365	-0.750486	-1.46585	-2.81806	0.621161	0.0212839	0.808046
P63017;Q504P4	Heat shock cognate 71 kDa protein	Hspa8	0.045631	0.0597865	0.00208027	-0.113862	-0.0984641	0.112407	0.0606048	-0.0138399	0.119228	0.242142	0.198948	0.0409112	0.252587	0.0366695	0.176943	0.197808	0.781306	0.0421108	0.810387
E9PWG6		Ncapg	-0.0411188	0.0585855	0.0543009	-0.0765859	0.100766	-0.0377252	0.178943	-0.167747	-0.208621	-0.117788	-0.439468	-0.137661	-0.431761	-0.199187	-0.238626	0.0696738	0.778039	0.0260065	0.812055
Q9D6N1	Carbonic anhydrase 13	Ca13	0	0	0	0	0	0	0	8.44052	10.5677	0	9.80912	9.66989	8.84495	10.3571	10.9564	0	0.355918	0.0411547	0.814928
Q03963	Interferon-induced, double-stranded RNA-activated protein kinase	Eif2ak2	-0.755897	0.0614044	0.739323	-0.525022	0.610947	0.764479	-0.142612	0.856065	2.76053	2.68855	3.11539	2.77703	3.0989	3.06175	2.62037	2.69159	0.175296	3.17937e-05	0.815351
Q99KQ4	Nicotinamide phosphoribosyltransferase	Nampt	0.160647	-0.06651	-0.14099	0.0290918	0.250449	0.134381	0.230994	0.281338	1.20561	1.1048	1.56936	1.24491	1.1624	1.25211	1.41384	1.4419	0.017696	0.000227434	0.815914
Q6NSW3;E9PUC4;A0A0R4J1Y6	A-kinase anchor protein SPHKAP	Sphkap	-0.219843	-0.291601	0.574195	-0.259289	-0.541312	0.279965	-0.0391579	0.227704	-0.412442	-0.985942	-0.784923	-2.41952	-0.613436	-2.10678	-0.987455	-0.332607	0.957051	0.0496129	0.819512
Q9CXE7	Transmembrane emp24 domain-containing protein 5	Tmed5	-0.175834	0.201414	0.139018	-0.21129	0.102754	0.00660449	0.780638	0.427175	0.347649	0.824734	0.829067	0.861772	0.0910291	0.381394	1.25106	1.14059	0.159435	0.00439947	0.829578
Q6NZB0;A2ALF0;A2ALF3;F6TQL3	DnaJ homolog subfamily C member 8	Dnajc8	0.0720864	0.0143869	0.0432561	-0.138751	0.245404	0.119926	0.0054578	0.371593	0.088918	0.398806	0.543894	0.211644	0.339696	0.292969	0.155577	0.581149	0.0888336	0.0360335	0.835717
A0A2I3BR81;A0A2I3BRL0;A0A2I3BQR1;Q91X76		Nt5dc2	0.320071	0.00783083	-0.334499	-0.0692916	0.426866	-0.182258	0.0515852	0.672829	-0.132495	-0.82441	-0.63066	-0.531362	-0.342136	-0.772875	-0.374855	-0.444571	0.291115	0.0486206	0.858136
P63002;A0A1W2P757	Amino-terminal enhancer of split	Aes	0.0521383	0.139374	0.0590003	-0.286253	0.699801	0.192839	-0.0144847	-1.04253	-10.6452	-1.20006	-1.53754	-0.597664	-1.09511	-2.79564	-1.21193	-1.82075	0.810767	0.00535477	0.860638
Q4VA98;Q6IQX8		Zfp219	-6.05343	-6.05343	-6.05343	1.98362	1.69447	2.5868	1.03297	-6.05343	2.88326	2.36642	2.76401	0.527475	2.43208	2.31608	2.22209	2.26948	0.295175	0.0449186	0.871889
Q9JIF0;A0A171KXD3;A0A140LHF7;A0A140LJF4	Protein arginine N-methyltransferase 1	Prmt1	-0.205217	0.121227	0.0408307	0.0232221	0.072421	-0.00812031	0.157279	-0.0479975	0.265807	0.206223	0.23342	0.0910269	0.141824	-0.00122093	0.325869	0.367681	0.59516	0.0361447	0.87254
Q9D0A3	Arpin	Arpin	0.00956448	0.131705	0.0495062	-0.212819	0.243601	0.493126	0.131301	0.321762	0.0438579	0.267728	0.425192	0.486864	0.140475	0.192411	0.447359	0.518169	0.029394	0.0436506	0.898283
Q8BMJ3	Eukaryotic translation initiation factor 1A, X-chromosomal	Eif1ax	0.299181	-0.584585	-0.229949	0.321984	0.299335	-0.709145	-0.464214	-0.65689	-0.352208	-0.780816	-1.18154	-0.799544	-0.7568	-0.982347	-0.848528	-0.365716	0.366819	0.0449213	0.899281
Q3U0V1;A0A3B2WCD8	Far upstream element-binding protein 2	Khsrp	0.0269154	-0.22043	0.206083	-0.0449742	0.109613	0.133958	0.0938427	0.334727	0.259901	0.331241	0.345001	0.431554	0.324982	0.243875	0.281344	0.541729	0.148985	0.00786904	0.906794
Q9D924;I3ITR1	Iron-sulfur cluster assembly 1 homolog, mitochondrial	Isca1;AK157302	0.182697	-0.095115	-0.185009	0.0692279	-0.00405676	-0.171823	-0.0789203	0.0263935	-0.762756	-0.340799	-0.918614	-1.52303	-0.431575	-0.8577	-0.682457	-1.33588	0.580452	0.00667708	0.907046
Q61033	Lamina-associated polypeptide 2, isoforms alpha/zeta	Tmpo	-0.0364811	-0.0582152	0.0611476	0.0302978	-0.161693	-0.130056	-0.0450219	0.0749735	-0.180167	-0.213412	-0.464132	-0.0861461	-0.492399	0.124011	-0.36556	-0.183895	0.336558	0.0256475	0.909245
Q01320	DNA topoisomerase 2-alpha	Top2a	-0.0666774	-0.0330128	0.126302	-0.0346096	-0.147681	-0.0776432	0.160611	0.0587501	-0.240242	-0.244658	-0.193104	-0.251469	-0.365409	-0.217818	-0.209624	-0.121865	0.967802	0.00348358	0.909334
Q8CAS9;H7BWY5	Poly [ADP-ribose] polymerase 9	Parp9	-0.176686	0.558558	0.540858	-2.41401	-3.13943	-0.243075	1.30438	1.21032	5.84145	5.68131	5.8175	5.85473	5.5016	5.78178	5.89361	6.02562	0.526637	3.22068e-08	0.914278
Q9Z2F2	2-5-oligoadenylate synthase-like protein 2	Oasl2	0	0	0	0	0	6.77666	6.28005	0	13.0544	12.5114	13.5144	12.8959	12.919	13.0397	13.1252	12.97	0.143398	0.000473596	0.917127
Q9CR50;G3UWD8	RING finger and CHY zinc finger domain-containing protein 1	Rchy1	-1.15734	0.25773	-8.22675	1.23433	1.18138	-0.738269	0.438328	-0.464297	1.63801	1.88224	1.0041	0.946979	1.35406	0.931476	2.05242	1.26078	0.723975	0.0457652	0.918905
Q6Q899;A2AP29	Probable ATP-dependent RNA helicase DDX58	Ddx58	0.846713	-7.0392	-1.65928	0.908736	-1.68035	-7.0392	-7.0392	1.39804	5.13319	4.88966	5.78543	4.5147	5.20753	4.8072	4.95369	5.44482	0.757232	0.00251329	0.919771
F6VRP8		Lgals3bp	-10.5558	0.569986	0.185497	0.462175	-10.5558	0.759259	-0.10993	0.307869	2.96247	2.00276	2.31769	2.29816	2.61388	2.46847	2.46586	2.28178	0.944984	0.00249388	0.925025
Q99KP6	Pre-mRNA-processing factor 19	Prpf19	-0.0291008	-0.0504876	0.104551	-0.0303257	0.383264	-0.0929167	-0.107146	-0.224335	0.0784585	0.0720466	0.12901	0.0922303	-0.0210816	-0.00433112	0.021722	0.376264	0.951602	0.0484565	0.926695
Q5NBU8	XIAP-associated factor 1	Xaf1	0	0	0	0	0	0	0	0	12.1294	12.3423	12.6466	12.1135	12.4558	12.3956	12.2417	12.2429	#DIV/0!	3.17349e-05	0.931523
Q9D1K2;A0A0N4SVE1;F7B2B4	V-type proton ATPase subunit F	Atp6v1f	-0.372263	0.0396359	0.0567679	0.213432	0.556809	0.0818066	0.126529	0.720983	0.323606	0.229061	0.394932	0.266534	0.225738	0.381693	0.114501	0.497192	0.104481	0.0355847	0.939488
Q9CX56;Q9CPS5;Q3TG45	26S proteasome non-ATPase regulatory subunit 8	Psmd8	0.0753549	0.0964898	-0.0847433	-0.0981062	0.291266	0.0108814	-0.00234117	0.146984	0.566516	0.254515	0.263908	0.464888	0.504057	0.326296	0.487524	0.268206	0.233294	0.00737805	0.949163
P40237	CD82 antigen	Cd82	-0.233685	0.116644	0.912547	-2.45036	0.393179	-9.50933	-0.285872	-0.0798389	3.11666	3.00997	2.53705	3.01268	2.56459	3.05524	3.10493	2.99322	0.625477	9.3035e-05	0.958531
O08797		Serpinb9	0	0	0	0	5.91601	6.32576	0	0	9.89713	8.19903	10.9705	10.1021	10.1306	9.48268	10.359	10.1463	0.140497	0.0215826	0.964284
O70126	Aurora kinase B	Aurkb	-0.263388	0.145462	0.32979	-0.314812	-0.17616	-0.027033	0.291654	-0.753947	-0.925891	-0.262876	-7.99369	-7.99369	-7.99369	-0.658795	-0.524295	-7.99369	0.65853	0.0298431	0.978781
Q91Y97	Fructose-bisphosphate aldolase B	Aldob	0.236837	-0.329581	-0.114413	0.140214	-0.253952	-0.250356	-0.107338	-0.347507	-0.497303	-0.927256	-0.388163	-0.694893	-0.706418	-0.649402	-0.817122	-0.332372	0.148157	0.0140934	0.989457
Q9Z2I8	Succinyl-CoA ligase [GDP-forming] subunit beta, mitochondrial	Suclg2	-0.201983	0.176997	-0.040783	0.0398262	-0.08697	-0.0845185	-0.0441188	0.165545	0.33155	0.137461	0.567806	0.208318	0.344234	0.454874	0.253396	0.215818	0.934151	0.0479349	0.995183
Q61179;E9PZJ2;E9Q8M6	Interferon regulatory factor 9	Irf9	0	0	0	0	0	0	0	0	12.4371	12.5206	12.5896	12.4025	12.1496	12.0795	12.2109	12.1567	#DIV/0!	4.26231e-08	0.000694434
Q8CDG3;A0A0R4J0M9	Deubiquitinating protein VCIP135	Vcpip1	1.0314	0.0370774	-0.12941	-5.98777	-5.98777	0.773093	-0.385691	-1.16679	1.49192	1.62471	1.35805	1.30229	0.418589	-0.0677983	-0.199661	-5.98777	0.645073	0.00746519	0.000792333
O55126;Q7TMG8;A0A0G2JEV1	Protein NipSnap homolog 2	Gbas	-0.676553	0.0640221	0.621606	-0.339385	0.475505	0.16468	0.465585	0.465108	0.460942	0.771799	0.668139	0.670904	-0.193534	0.114763	0.19358	0.141865	0.180171	0.0362525	0.00134826
Q91VL8	Telomeric repeat-binding factor 2-interacting protein 1	Terf2ip	-0.243787	0.210145	0.216297	-0.256835	0.495089	-0.267494	0.252886	-0.00682906	0.106145	0.570877	0.750574	0.63946	-1.05124	-1.57654	-0.3048	-0.660569	0.517133	0.0306841	0.00176808
Q8BZ20	Poly [ADP-ribose] polymerase 12	Parp12	0	0	0	0	0	0	0	0	10.0217	10.2293	10.8358	10.1048	9.10918	7.6174	6.33294	7.89262	#DIV/0!	0.000388405	0.00260844
G3X922;D4AFX7		Dnajc13	-0.228305	0.0522943	0.182439	-0.0370443	0.225001	-0.20537	0.289196	1.14923	0.524713	0.580017	0.597578	0.416634	0.356302	-0.0781585	0.139277	-0.113614	0.26388	0.000777021	0.00585336
A0A0R4IZW9;Q9DCT5	Stromal cell-derived factor 2	Sdf2	-0.165081	0.119933	0.310402	-0.355897	0.0263679	-0.877335	-0.604386	-2.87679	0.565959	0.785991	0.951565	0.935403	-3.28248	-0.0845594	0.379048	-2.53475	0.0960931	0.00200232	0.0109367
Q99K70;Q7TT45;B1AWT2;B1AWT3;B1AWT4	Ras-related GTP-binding protein C;Ras-related GTP-binding protein D	Rragc;Rragd	0.149076	-0.438784	0.405591	-0.270984	0.171238	0.323143	0.631766	0.31954	0.487537	0.595168	1.08416	0.500093	0.051083	0.173158	-0.193689	-0.253178	0.118837	0.0305726	0.0130074
Q8VEH8	Endoplasmic reticulum lectin 1	Erlec1	-0.233239	0.156678	0.15058	-0.113186	0.343599	1.22037	0.389672	0.358625	1.03514	1.07809	1.06759	1.11294	0.714524	-0.890113	0.539186	0.474934	0.0881058	4.31229e-06	0.0135608
Q9CQ21	Malignant T-cell-amplified sequence 2	Mcts2	0.20957	-0.106593	-0.167596	0.0349935	-0.204919	-0.190192	0.431374	0.316243	0.184811	0.139628	0.406221	0.489972	-0.265282	-0.0125349	-0.556159	0.033447	0.562687	0.0422448	0.0155491
Q91YD3;A0A286YDC8	mRNA-decapping enzyme 1A	Dcp1a	0.245995	-0.86142	0.7142	-0.68245	0.0292417	1.53556	1.51089	1.4843	1.05304	0.7167	1.1586	1.47778	0.664303	0.0631599	-0.922444	0.335584	0.0378552	0.0145342	0.0157898
Q9QWH1	Polyhomeotic-like protein 2	Phc2	0.0344365	-0.833239	0.34698	0.192421	0.591938	0.200875	0.572473	0.614736	0.787545	0.714187	1.15231	0.814219	-0.418214	0.3209	-0.703702	0.585757	0.0580309	0.0061583	0.0167339
Q921H9	Cytochrome c oxidase assembly factor 7	Coa7	-0.329794	0.342826	-0.174363	0.0703249	0.767456	-0.015137	0.926705	1.11896	1.15205	1.11683	1.26012	0.880628	0.623419	0.433043	-0.0629373	0.91006	0.0447706	0.000303405	0.0179047
Q9JI99;A0A1W2P6K9	Sphingosine-1-phosphate phosphatase 1	Sgpp1	-0.29255	-0.559434	0.336885	0.312604	-1.15375	-1.48531	-1.01102	-0.620531	-2.49863	-0.867514	-2.43101	-0.664622	-10.2568	-10.2568	-10.2568	-10.2568	0.018963	0.0179368	0.0179309
Q8BHK9	DNA excision repair protein ERCC-6-like	Ercc6l	0.0594083	-0.475843	0.375769	-0.0871437	-0.26618	0.2051	0.0275122	-0.130779	0.42403	0.413081	0.644967	0.415003	0.227443	-0.00730507	0.142494	0.340108	0.885734	0.0254502	0.0184403
Q8CIE4		Parp10	-5.9374	1.09224	-5.9374	0.876028	-5.9374	-0.183197	0.0482712	-5.9374	5.73677	5.82366	5.6553	5.41738	5.23702	4.69022	4.42373	5.44227	0.448676	3.18873e-06	0.0196606
Q6KAR6	Exocyst complex component 3	Exoc3	0.406952	-0.728836	-0.554396	0.474862	-0.127234	-0.266387	1.20336	-0.614037	1.09724	1.28129	1.54165	0.932123	-0.327753	0.575781	0.94811	-0.0158343	0.698648	0.0041276	0.0204276
P53986	Monocarboxylate transporter 1	Slc16a1	0.0150648	0.197591	-0.0185402	-0.225177	-0.157059	0.154883	0.378941	-0.13462	0.450448	0.292347	0.595522	0.369681	-0.83234	-0.249505	0.259867	-1.72292	0.640316	0.00656873	0.0213261
Q8VC57;A0A0R4J000	BTB/POZ domain-containing protein KCTD5	Kctd5	0	0	0	0	0	0	8.2986	0	8.47043	8.23949	8.96235	8.20782	7.79652	7.85536	0	0	0.355918	0.00025771	0.021385
Q80TK0;A0A1D5RL96	Uncharacterized protein KIAA1107	Kiaa1107	0.060244	-0.111318	0.241167	-0.23503	-0.0937447	-0.540215	-0.683759	-0.422711	0.53404	0.769846	0.467461	0.373264	0.273878	-0.365774	0.231782	0.133335	0.0443157	0.00703531	0.0248745
G3X920;Q9DBR3	Armadillo repeat-containing protein 8	Armc8	-0.547329	-0.138437	0.334903	0.196505	0.118051	-0.337337	-0.0788137	0.173819	0.824437	0.284794	0.816369	0.452981	0.319924	-0.140412	-0.0753532	0.152242	0.938042	0.0315148	0.0249829
Q9JKX6;A2ATT5;A0A0A6YVU1	ADP-sugar pyrophosphatase	Nudt5	-0.150679	-0.0303877	0.0805512	0.087591	0.106804	0.126219	0.206404	-0.0977744	0.20485	0.196142	0.456616	0.333654	-0.0417781	-0.157505	-0.0938825	0.225401	0.326424	0.0121656	0.0251788
Q8VI93	2-5-oligoadenylate synthase 3	Oas3	0	0	0	0	0	0	0	0	6.3447	6.70025	7.05999	8.31177	0	0	0	0	#DIV/0!	0.026259	0.026259
Q9D7N6	39S ribosomal protein L30, mitochondrial	Mrpl30	-7.37874	-7.37874	1.99348	-7.37874	2.5005	2.44715	1.33144	-7.37874	3.20428	2.03656	1.98647	2.11724	1.22624	1.26521	-7.37874	-7.37874	0.199347	0.0342943	0.0266743
A0A3B2WBE1			-0.0758264	0.286893	-0.181916	-0.0745173	0.117806	0.273465	-0.192033	0.234735	0.389487	0.961751	0.586434	0.670099	0.237628	0.167393	0.146532	0.386539	0.446498	0.00861386	0.0275143
P27048;P63163;A0A0G2JGN4	Small nuclear ribonucleoprotein-associated protein B;Small nuclear ribonucleoprotein-associated protein N	Snrpb;Snrpn	-0.0426876	-0.0834378	0.08959	0.0303807	0.310999	0.139601	0.441997	-0.195445	0.437306	0.273421	0.514518	0.267826	0.243487	0.160963	0.00825983	0.166635	0.230797	0.0028529	0.0286261
P56959;G3UXT7;Q8CFQ9	RNA-binding protein FUS	Fus	0.121	-0.136962	0.0655372	-0.0640052	0.30211	0.362026	0.228479	0.129782	0.271169	0.671461	0.574671	0.547814	-0.177742	-0.0247817	0.0448258	0.445995	0.0147491	0.00305447	0.0304085
D3Z5I1;Q3UPF5;G3X9X5	Zinc finger CCCH-type antiviral protein 1	Zc3hav1	-0.0405936	-0.125783	0.342048	-0.245225	0.0283767	-0.493248	0.200662	-0.0212427	1.56215	1.68557	1.67929	1.79215	1.4364	1.30121	1.63659	1.38406	0.805152	4.05373e-06	0.0307528
Q8WTY4;F7BWP1;E0CYY1	Anamorsin	Ciapin1	-0.308098	0.121786	0.293961	-0.18736	0.610445	0.516467	0.220353	0.230162	0.602837	0.161014	0.801453	0.704544	-0.106071	0.227206	-0.668493	0.234876	0.0504109	0.0234847	0.0310723
O08795	Glucosidase 2 subunit beta	Prkcsh	0.0122869	0.101268	-0.0386809	-0.0813292	-0.0297915	0.216739	0.0988303	0.0439793	0.285539	0.341859	0.300372	0.0860359	0.0965881	0.0546129	0.143689	-0.0216412	0.246039	0.0106129	0.0317536
Q8BHL8	Proteasome inhibitor PI31 subunit	Psmf1	-0.151768	-0.237991	0.154544	0.187588	-0.151247	0.041252	-0.132647	-0.223003	0.552978	0.287134	0.456369	0.504588	-0.419761	0.226746	0.0700685	0.271757	0.395267	0.00665	0.0319591
P62746	Rho-related GTP-binding protein RhoB	Rhob	0	0	0	0	0	0	0	0	9.27543	8.70233	0	9.6308	0	0	0	0	#DIV/0!	0.0366512	0.0366512
Q9JKC8;H7BWY2;A0A286YDZ6	AP-3 complex subunit mu-1	Ap3m1	-0.16224	-0.112637	-0.0813902	0.306053	0.0385459	0.177602	0.156105	0.244036	0.228051	0.319823	0.438044	0.277568	-0.244791	0.261299	-0.166683	0.10753	0.232259	0.0319749	0.03708
P97471	Mothers against decapentaplegic homolog 4	Smad4	-0.158258	0.141872	0.125475	-0.136551	1.341	-0.0233054	0.00483339	-0.51556	0.687666	0.460296	0.347964	0.432462	-0.181503	-1.11041	0.192439	0.250848	0.494079	0.00471041	0.0376831
Q60766	Immunity-related GTPase family M protein 1	Irgm1	1.3556	-1.20131	-0.469059	-1.81778	-1.33539	-1.56146	-1.51334	-0.831372	3.95404	3.73815	4.01069	3.90648	3.71596	3.66516	3.72293	3.81423	0.309684	2.15964e-06	0.0409092
Q9D8B3	Charged multivesicular body protein 4b	Chmp4b	-0.188395	-0.105626	0.363812	-0.142105	0.165484	-0.326922	-0.0371252	-0.19464	0.741688	1.10224	1.30458	0.830224	0.777097	0.519406	0.165717	0.618229	0.642111	0.00261577	0.0425057
A2A4P0;A2A4N9	ATP-dependent RNA helicase DHX8	Dhx8	-3.75905	0.633545	-3.75905	1.2022	1.844	1.67163	-3.75905	1.72258	1.79093	1.58155	2.98417	2.80866	0.950658	-3.75905	1.24871	1.55	0.17342	0.0186763	0.0442498
S4R2R5		Ank2	-0.379223	0.0955699	0.346093	-0.165617	-0.0998513	-0.521738	0.225556	0.0601493	-0.515556	-0.713068	-0.795688	-0.591721	-1.72684	-0.861047	-0.972287	-0.895751	0.798295	0.0181804	0.0452287
Q9D0R8;A0A0A0MQC9	Protein LSM12 homolog	Lsm12	-0.102315	0.0516491	-0.602995	0.457992	0.581537	-0.481621	0.00422639	-0.433807	0.509452	0.915893	1.10768	1.02812	-0.0621672	0.675612	0.642546	0.148048	0.963892	0.00700591	0.045986
P97450;E9QAD6	ATP synthase-coupling factor 6, mitochondrial	Atp5j	-0.022528	-0.239897	0.129537	0.103995	0.112871	0.31986	0.196227	0.0964379	0.257819	0.464201	0.343277	0.119845	0.0135288	-0.0684753	0.203414	0.09795	0.0986033	0.0317658	0.0470027
Q8R1V4;Q5SVW9	Transmembrane emp24 domain-containing protein 4	Tmed4	0.0330469	-0.32868	0.0750629	0.172689	0.73361	-0.0955186	-0.154602	0.453147	0.450874	0.978587	0.483485	0.693636	0.318364	0.359512	0.338124	0.200143	0.312749	0.00936528	0.0479438
P62876	DNA-directed RNA polymerases I, II, and III subunit RPABC5	Polr2l	0.246668	-0.491422	0.17526	-0.0394225	-12.4991	0.318076	-0.299143	-0.737819	0.576326	0.625275	0.587272	0.247016	-0.0365923	-12.4991	0.314782	-0.431787	0.276668	0.0184186	0.0483795
Q9DBR7;A0A1W2P750	Protein phosphatase 1 regulatory subunit 12A	Ppp1r12a	-0.130425	0.0374038	0.117338	-0.0358744	-0.227137	-0.109476	0.119875	-0.117159	0.330476	0.197535	0.36147	0.171111	0.163582	0.00264168	-0.0998507	0.192145	0.42425	0.00908751	0.0507732
Q9JI75;A0A1Y7VMA0;A0A1Y7VL95	Ribosyldihydronicotinamide dehydrogenase [quinone]	Nqo2	-0.645406	-0.827316	0.793794	0.0887966	0.450972	0.800672	1.04478	0.981172	1.50472	1.64848	1.77987	1.44468	1.03961	1.20392	0.770585	1.58308	0.0442059	0.000625316	0.0513983
Q62241;A0A3B2W450;A0A3B2WCR6	U1 small nuclear ribonucleoprotein C	Snrpc	-0.109368	0.0135008	0.00615136	0.0831534	0.0750464	0.270923	-0.0367311	-0.23054	0.232168	0.158863	0.230213	0.170402	0.137688	0.0863989	-0.206635	0.0564227	0.792138	0.00332884	0.0521982
Q9JJ00	Phospholipid scramblase 1	Plscr1	0.156834	-0.377481	0.513636	-0.540069	-0.926083	-0.221494	0.264103	-0.359265	1.00664	1.54767	0.671347	1.31022	-0.974799	0.702997	-1.28952	0.936115	0.496736	0.00962158	0.0556333
Q8CI75	DIS3-like exonuclease 2	Dis3l2	-1.2079	-0.179227	0.142611	0.659948	1.80968	-0.150465	0.493965	0.856739	0.763327	0.363429	1.42138	1.49295	0.272957	-0.338702	0.455035	0.4508	0.189649	0.0447356	0.0566402
Q6NS46	Protein RRP5 homolog	Pdcd11	0.656558	-0.770031	-0.0535009	-0.194819	1.99677	0.516457	2.14359	0.270269	2.22211	1.96794	3.06716	1.74702	1.83932	0.152428	0.672912	1.20273	0.0877476	0.0122061	0.0578863
P29351	Tyrosine-protein phosphatase non-receptor type 6	Ptpn6	-0.214319	-0.604045	0.850501	-0.562744	-0.0693783	0.388913	1.65967	0.674899	1.43016	1.09351	1.74147	1.0458	-0.0961671	1.02149	0.633376	1.04677	0.224376	0.00823654	0.0612898
Q5SX75;Q60716	Prolyl 4-hydroxylase subunit alpha-2	P4ha2	0.0321928	0.286178	-0.360558	-0.0303744	0.0671987	0.431193	-0.322438	-0.362247	-0.94387	-0.766593	-0.826083	-0.944082	-0.839986	-1.40338	-1.32836	-2.062	0.968737	0.00266166	0.0623592
Q9EP82;A0A494B9R5;E9Q156	tRNA (guanine-N(7)-)-methyltransferase non-catalytic subunit WDR4;tRNA (guanine-N(7)-)-methyltransferase non-catalytic subunit Wdr4	Wdr4	0.287174	-8.29474	0.68643	0.22314	-0.917609	1.39701	0.450321	0.163007	1.04752	1.33734	1.46161	0.974352	-0.219518	0.575869	1.25586	-0.81337	0.491458	0.0150195	0.0650096
Q8BJU0;A0A1W2P6P1;A0A1W2P7I5	Small glutamine-rich tetratricopeptide repeat-containing protein alpha	Sgta	-0.0965554	-0.161405	0.237892	-0.0125852	0.189	0.0421884	0.10449	-0.0625435	0.273902	0.249579	0.57062	0.328007	0.0593326	0.286234	0.154415	0.0644915	0.518451	0.022126	0.065675
Q925I1	ATPase family AAA domain-containing protein 3	Atad3	0.644526	-0.224121	-0.0745235	-0.664282	1.03781	0.840967	0.968499	0.843304	0.555094	1.5288	0.834491	1.06841	0.388583	0.60271	0.0846005	0.575234	0.00513834	0.0268646	0.0681564
Q91YU8	Suppressor of SWI4 1 homolog	Ppan	-7.4318	-7.4318	1.12553	0.85328	-7.4318	-7.4318	1.14398	-7.4318	1.30123	1.50714	1.64148	1.02639	-7.4318	1.01442	1.25797	-7.4318	0.59933	0.0414673	0.0685798
P70372	ELAV-like protein 1	Elavl1	-0.273275	0.0391224	0.101512	0.100541	0.232701	0.174109	0.257884	-0.134505	0.26898	0.216527	0.195956	0.146989	0.174918	-0.0485103	0.143334	-0.177712	0.286955	0.0463526	0.0719991
Q8R2Y0	Monoacylglycerol lipase ABHD6	Abhd6	-0.085695	-0.0659354	-0.0601907	0.193086	0.0575119	-0.0944768	0.18593	-0.0576542	0.343173	0.613029	0.141756	0.273269	-0.180182	0.0705433	0.29267	-0.522355	0.78392	0.0353102	0.0736087
Q8K409	DNA polymerase beta	Polb	-0.00384262	-0.0928599	0.248513	-0.189325	-10.1398	-0.115662	0.63014	-2.0667	-0.23733	-0.545133	-0.385257	-1.07601	-1.77485	-0.510671	-10.1398	-1.34568	0.400199	0.0263757	0.0811505
G5E8R2;E9Q453;E9Q456;E9Q450;E9Q448;Q8BP43		Tpm1	0.0950987	0.032087	0.36876	-0.694021	0.212939	0.544995	0.687005	0.386558	0.786171	0.498914	0.674224	0.443248	-0.0948115	0.136643	0.311564	0.629387	0.0653743	0.0185499	0.0856445
Q8C163	Nuclease EXOG, mitochondrial	Exog	-1.54945	-0.250886	0.822341	0.0699861	0.491877	1.47691	0.212405	1.78029	0.819125	0.840457	1.32715	1.78353	1.06951	0.366955	0.375793	0.176219	0.102574	0.0316219	0.0869124
Q3TEG0		A830010M20Rik	0.1264	0.360961	-0.112917	-0.515736	-0.420993	0.404543	-0.0653184	0.570787	1.38689	0.54667	0.768244	0.416708	0.189632	0.389773	0.323634	-7.34691	0.563674	0.0482277	0.0909177
Q99MN9;E9Q1J7	Propionyl-CoA carboxylase beta chain, mitochondrial	Pccb	-0.0174712	0.404528	-0.18286	-0.308597	-0.603741	-0.555728	0.63259	0.314879	0.544547	0.590885	0.934563	0.560413	0.0274842	0.127001	0.686507	-2.16501	0.897695	0.009671	0.0968448
Q8JZN7	Mitochondrial Rho GTPase 2	Rhot2	-0.162932	0.214106	0.226751	-0.364738	-0.935757	-0.0101531	-0.0444124	-1.04588	0.682045	1.24404	0.793802	0.808058	-3.09936	-0.0820754	0.975725	0.254487	0.179657	0.00467618	0.100893
Q8CAA7	Glucose 1,6-bisphosphate synthase	Pgm2l1	-4.45467	0.731074	0.732041	-0.658506	1.03727	-1.65199	0.780126	-1.37512	1.64659	0.971816	1.8245	0.871837	-1.44491	-0.219493	-0.252514	1.54437	0.850262	0.0324516	0.101781
Q924T3;A0A0R4J1Y0;A0A0R4J024;E0CZC8	DNA repair protein XRCC4	Xrcc4	0.237831	1.06639	-0.47118	-7.58237	1.11906	1.354	1.44444	-0.0211677	1.29531	1.52849	1.77712	2.40693	1.19339	0.797308	1.62574	0.304545	0.107924	0.0166069	0.102186
P61922	4-aminobutyrate aminotransferase, mitochondrial	Abat	-0.190799	-0.210517	0.17001	0.182166	-0.303301	-0.566664	-0.0900627	0.0679855	-0.562999	-0.250357	-0.460509	-0.541247	-1.15379	-0.847165	-0.623415	-0.454307	0.277086	0.0189592	0.102817
Q9JI90;G3XA54	E3 ubiquitin-protein ligase RNF14	Rnf14	-0.498406	0.264361	0.133704	-0.00882549	-1.19819	-0.502102	0.0152843	-0.133677	0.899677	0.958648	1.16603	1.42223	0.465388	0.95827	0.347548	1.04525	0.207257	0.00143639	0.10413
Q6PF93;D3YZ98;E9QLS6;E9Q824	Phosphatidylinositol 3-kinase catalytic subunit type 3;Phosphatidylinositol 3-kinase	Pik3c3	-0.000324819	0.453188	-0.26365	-0.325204	0.265868	-2.57074	-2.22747	-2.22529	0.827366	0.183034	0.932247	0.61259	0.596088	-1.76714	-2.09582	0.494002	0.099841	0.033772	0.109144
Q8BYY4	Tetratricopeptide repeat protein 39B	Ttc39b	-1.17213	-0.374348	0.541966	0.410151	0.313711	-1.08596	0.417904	0.24728	1.17323	1.22317	1.4588	1.03422	0.977103	1.22256	0.922798	0.866534	0.854585	0.00294316	0.115627
O70435;E0CX62	Proteasome subunit alpha type-3	Psma3	0.139294	-0.22711	0.309377	-0.31273	0.170046	0.212354	-0.264815	0.0649036	0.407328	0.345843	0.698848	0.469456	0.502636	0.0531558	-0.244933	0.307282	0.759185	0.0206644	0.117115
Q9DB77	Cytochrome b-c1 complex subunit 2, mitochondrial	Uqcrc2	-0.0310492	-0.130843	0.0150645	0.134218	0.0537049	0.150745	0.16786	0.088357	0.194312	0.279855	0.106335	0.135987	-0.0464593	0.0618965	0.214404	-0.101403	0.100836	0.0341697	0.11806
Q8K1R3	Polyribonucleotide nucleotidyltransferase 1, mitochondrial	Pnpt1	0.139563	-0.256843	0.170204	-0.0949679	0.00572973	-0.802381	0.0884852	-2.20656	1.10282	0.739437	0.362733	0.644181	0.608433	-0.524072	0.426153	0.338399	0.222843	0.0133789	0.11997
Q9Z2D3;D3YYP5;E9Q5V3	Non-syndromic hearing impairment protein 5 homolog	Dfna5	0.54198	-0.260485	-0.796789	0.180904	0.202615	-0.160932	0.668983	0.115389	0.845254	0.844296	0.363056	0.732526	-0.442076	0.712474	-0.76718	0.580048	0.483052	0.0302685	0.123554
A0A0J9YTR2			-8.01316	0.716567	-8.01316	1.23204	1.82101	1.42861	1.63016	1.41582	1.48475	1.26047	1.00246	1.68363	-8.01316	0.82531	1.03192	1.24543	0.0189414	0.0481176	0.123816
O88533	Aromatic-L-amino-acid decarboxylase	Ddc	0.0674654	0.135929	0.121725	-0.38592	0.244374	-0.145761	0.0169958	-0.458429	-0.585205	-0.397838	-0.250955	-0.468787	-1.24719	-0.603073	-1.02621	-0.350388	0.741121	0.0270894	0.128057
Q99LG4;Q8BNN3;A0A2I3BRU0	Tetratricopeptide repeat protein 5	Ttc5	0.952838	1.042	-8.57429	-8.57429	3.03815	-8.57429	-8.57429	-8.57429	2.09646	2.30162	0.35549	1.82055	1.85226	1.07126	-8.57429	-8.57429	0.638183	0.0434303	0.130554
Q99L27	GMP reductase 2	Gmpr2	-0.0150319	0.155126	-0.0909358	-0.0620036	0.141833	0.360532	-0.500801	0.206732	0.400125	0.317449	0.474811	0.00558505	0.283121	-0.0941496	0.125984	-0.0217522	0.651362	0.041312	0.131403
P47802;Q8R5C0;A0A6I8MWZ8;D3YVW0;G3XA66;D3Z3F4;G3XA75;G3UYJ5;G3UXX9	Metaxin-1	Mtx1	0.0566395	-0.0908777	0.073064	-0.0453424	0.146855	0.1717	0.0297979	0.123459	0.13773	0.582056	0.51159	0.131633	0.12141	-0.189601	0.236856	0.152592	0.0529081	0.0431758	0.133212
Q99L48	60S ribosomal export protein NMD3	Nmd3	-8.47641	0.0189146	0.594066	0.560226	-0.655571	0.243436	1.11151	-8.47641	0.772761	1.12813	1.90039	1.37595	-0.04802	1.01077	1.28141	-1.17452	0.994079	0.0314338	0.134063
Q0VGU4		Vgf	-0.149618	0.0608499	0.0781713	-0.000357925	0.554363	0.0872622	-0.519899	-0.110132	0.496479	0.650529	0.974774	0.696852	0.517542	0.543144	0.279675	0.62062	0.82298	0.00189439	0.13872
Q9ES97	Reticulon-3	Rtn3	0.109265	-0.018974	-0.207164	0.095113	0.119736	-0.11945	-0.133837	-0.457897	-0.199101	-0.476948	-0.239087	-0.409687	-1.30885	-0.296552	-0.419195	-0.924038	0.354876	0.016265	0.139451
Q8BH95	Enoyl-CoA hydratase, mitochondrial	Echs1	0.0476244	-0.124621	-0.181987	0.223676	-0.0996299	0.0899762	0.18585	-0.0031135	0.347761	0.430516	0.343071	0.232557	0.237192	0.0717655	0.362168	0.188753	0.685308	0.0112518	0.139828
Q8CI51;D9J2Z9;D9J300;D9J301;D9J302	PDZ and LIM domain protein 5	Pdlim5	-0.172934	0.180723	0.0567172	-0.0901661	-0.1292	-0.149375	0.469047	-0.295357	0.36822	0.839073	1.26572	0.667042	0.421711	0.395945	0.582238	0.366216	0.979415	0.0191694	0.140532
Q99J87	Probable ATP-dependent RNA helicase DHX58	Dhx58	0.246364	-6.05208	1.47698	-6.05208	0.650881	2.19884	1.40131	-6.05208	6.74453	6.57327	6.51077	6.46908	6.60487	6.25473	6.36891	6.41159	0.340415	4.84545e-07	0.141783
Q9WTK5;A0A494B9Y5;A0A494BAQ2	Nuclear factor NF-kappa-B p100 subunit;Nuclear factor NF-kappa-B p52 subunit	Nfkb2	-0.158363	0.230714	-0.414343	0.23901	1.12414	0.447957	0.878746	0.0758937	3.4968	3.54352	3.48174	3.48453	3.26454	3.35295	2.98882	3.57769	0.0657392	7.84523e-10	0.143722
Q9D720;A0A0R4J0C0;F6VZ99	Non-structural maintenance of chromosomes element 1 homolog	Nsmce1	-0.378401	-0.181751	0.789962	-0.689546	0.212464	-0.702571	-0.97273	-0.0121944	0.737842	0.449559	1.10663	1.23904	0.93203	0.0949625	-0.14128	0.60688	0.557722	0.038749	0.145823
Q7TNP2;Q3TTF6;H3BKU1;G3UWS4;H3BLQ0;H3BLE7;H3BIV7	Serine/threonine-protein phosphatase 2A 65 kDa regulatory subunit A beta isoform	Ppp2r1b	0.0610505	-0.838531	0.10953	0.399101	-0.0158964	0.465336	-0.0667432	0.512894	0.43462	0.624554	0.928086	0.418487	0.312537	0.24135	-0.141762	0.639188	0.389402	0.0417468	0.148283
Q8BR07;G3UXK5;B2KG46	Protein bicaudal D homolog 1	Bicd1	0.18821	-0.189361	0.172031	-0.22261	-0.539958	-1.35501	-0.893247	-0.405007	-0.954264	-0.29421	-0.483508	-1.94177	-1.54604	-1.50088	-1.26	-1.4155	0.0108646	0.0264243	0.1487
Q99LF4	tRNA-splicing ligase RtcB homolog	Rtcb	-0.105817	0.00411199	0.227002	-0.156069	0.307402	0.199877	0.461183	0.395193	0.123742	0.184413	0.379746	0.414887	0.185755	0.105302	-0.0255817	0.235626	0.0138541	0.0457037	0.148805
P08228	Superoxide dismutase [Cu-Zn]	Sod1	-0.0510283	-0.034393	0.162377	-0.0905266	0.178654	-0.217158	0.444664	0.307169	0.376589	0.100915	0.285362	0.218784	-0.22412	-0.0948005	0.247291	0.204554	0.243158	0.0234404	0.148826
Q9EP73	Programmed cell death 1 ligand 1	Cd274	0	0	0	0	0	0	0	0	12.2428	12.2967	11.7713	11.8802	10.2359	11.5595	11.4412	12.213	#DIV/0!	3.052e-05	0.151369
O35129;F6QPR1	Prohibitin-2	Phb2	0.0567195	-0.0109028	0.188751	-0.2729	0.089684	0.183068	-0.292315	-0.0941952	0.375875	0.330923	0.670094	0.477485	0.407921	0.280836	-0.0070095	0.385476	0.906142	0.00806039	0.152687
Q6NZN0;E9Q640;E9PUF4;E9PYZ7	RNA-binding protein 26	Rbm26	-0.14736	-0.224525	-1.08247	0.822936	-7.05115	-0.0232653	-0.190267	-0.188041	1.18162	1.59479	2.26596	2.74371	0.42641	1.80056	-0.240494	1.72258	0.412539	0.0206424	0.15299
Q8CFQ3;A2AQA7	Intron-binding protein aquarius	Aqr	-0.0514607	-0.0548632	0.207439	-0.123876	-0.161883	0.292966	-2.78121	-0.0276316	0.664663	0.759409	0.322513	0.452567	-0.0258417	0.606266	0.407683	-0.0703308	0.45943	0.00582743	0.154178
Q68FF6;Q5F258	ARF GTPase-activating protein GIT1	Git1	-0.0075708	-0.351559	0.276006	0.0152964	0.440227	0.229499	0.501051	-0.0013364	0.66278	0.472577	0.715513	0.272227	-0.288367	-0.699114	0.0836939	0.753359	0.11615	0.0135871	0.155054
P52624;E9Q5K7;Q5SUC6;E9Q391	Uridine phosphorylase 1	Upp1	0.284473	-0.731883	0.173794	0.0729926	0.3145	-0.295655	0.279025	0.2208	1.11129	1.24503	0.755263	0.994531	0.87933	0.709492	0.763116	0.985536	0.542427	0.00183526	0.156204
Q60739;F6TCF9	BAG family molecular chaperone regulator 1	Bag1	1.99278	-7.23067	-7.23067	-7.23067	2.45274	1.27333	2.92055	1.24692	4.10937	2.7259	1.97924	2.97876	1.63165	2.56697	2.31181	1.12687	0.0751624	0.041333	0.15711
Q5U4D9;D3Z132	THO complex subunit 6 homolog	Thoc6	0.262441	0.4822	-0.310739	-0.743248	0.0867325	-0.613825	0.675094	0.383612	0.913671	1.05152	0.70058	0.622152	0.890565	-0.196421	-1.11121	0.740855	0.588666	0.0118828	0.158459
P24860;Q68EM3;G3UY65	G2/mitotic-specific cyclin-B1	Ccnb1	0.649489	-0.182388	-0.639352	-0.139009	-0.726491	-0.197097	0.0345365	-0.408547	-0.857563	-1.16586	-0.897497	-1.20109	-0.71428	-1.80948	-2.26342	-1.99188	0.424875	0.044973	0.162396
Q64327;A0A3B2WB12	Male-enhanced antigen 1	Mea1	0.0818699	0.532029	0.580209	-10.7404	0.210488	-10.7404	0.889958	0.270863	1.74231	1.42933	0.806979	1.74342	0.789463	0.849173	-10.7404	1.59091	0.919993	0.0131794	0.164541
Q9D4H8;E0CYT5	Cullin-2	Cul2	-0.331657	0.0863655	0.444867	-0.353845	0.0667515	-0.155344	-0.0201469	-0.558175	0.631048	0.563169	0.644005	0.429724	0.44403	0.174113	0.519934	0.541614	0.561706	0.0157396	0.17107
Q9ER80	Receptor-transporting protein 4	Rtp4	-7.5385	-7.5385	0.677171	1.25716	-1.39141	-7.5385	-0.836762	-7.5385	4.29637	4.17783	4.82025	4.68099	4.37334	3.70861	3.22928	4.54463	0.259873	0.000118094	0.171764
Q8CGE8	Interferon-activable protein 205-A	Ifi205a	0	0	0	0	0	0	0	0	7.81119	8.24614	8.81264	9.30831	9.07249	0	6.63597	0	#DIV/0!	0.004258	0.171926
Q8BKZ9;A2AWH8	Pyruvate dehydrogenase protein X component, mitochondrial	Pdhx	0.194413	0.307606	-0.327492	-0.28425	0.162053	-0.0161344	0.153355	0.238278	0.65428	0.64256	0.461296	0.466213	-0.253902	0.0216359	0.622215	0.508097	0.433174	0.00895884	0.173085
P36916	Guanine nucleotide-binding protein-like 1	Gnl1	-0.236062	-0.703343	-0.904077	1.00174	0.761066	0.257552	0.697466	1.08782	1.3056	1.24569	1.34742	1.10514	0.950129	1.37488	1.01727	0.501106	0.142164	0.00761199	0.175256
P42232;P42230;B2C3G8	Signal transducer and activator of transcription 5B;Signal transducer and activator of transcription 5A;Signal transducer and activator of transcription	Stat5b;Stat5a	-0.167869	-0.139178	-0.214243	0.422027	-1.27908	-0.46558	0.542726	0.230363	-0.291984	-1.03605	-1.31513	-0.580521	-1.35847	-0.73154	-1.21684	-2.18338	0.828523	0.0325073	0.182622
A0A0U1RP81			-0.0905492	-0.0244966	-0.0868521	0.184085	-0.0374463	0.130337	-0.161546	0.434605	0.106751	0.558096	0.487018	0.298826	0.282485	-0.126686	0.30758	0.166131	0.502101	0.0257632	0.185625
P58137;Q8BZR4	Acyl-coenzyme A thioesterase 8	Acot8	-0.183847	-0.00113086	-0.108101	0.254138	0.166719	0.371223	0.41904	0.16428	0.188425	0.453872	0.457179	0.344109	0.161809	0.201584	-0.251471	0.426708	0.0495668	0.0169997	0.187659
Q9JLJ1;A0A286YD19	Selenoprotein K	Selk	-8.69083	-8.69083	1.99738	-8.69083	2.00015	2.02675	2.02611	-8.69083	2.00927	2.1236	1.32651	1.87057	-8.69083	-8.69083	2.28331	1.27904	0.201559	0.0497033	0.191686
Q3U7K7;Q62191	E3 ubiquitin-protein ligase TRIM21	Trim21	1.96974	-5.17523	-5.17523	-5.17523	-5.17523	-5.17523	2.0858	1.78073	7.08635	6.55353	6.5039	6.48436	5.8875	5.93099	6.47243	6.74073	0.550659	0.000101232	0.192575
C0HKD9;C0HKD8			0.190778	0.183287	-0.0809512	-0.362678	-0.0736641	-0.234193	0.130696	0.0140119	0.439229	0.598478	0.453044	0.540399	0.229881	0.504381	0.527827	0.228437	0.821898	0.00422016	0.193441
Q569Z6;Q8BZN7	Thyroid hormone receptor-associated protein 3	Thrap3	-0.155622	-0.131104	0.37442	-0.163585	0.247113	0.200149	0.360806	0.121806	0.517822	0.461819	0.620822	0.27668	0.506019	0.317168	-0.0136441	0.320378	0.149452	0.017575	0.194107
Q8R0J8;A0A286YD91;D3Z4J6	Probable gluconokinase	Idnk	0	0	0	0	0	0	0	0	8.78682	9.16158	9.24722	0	0	0	7.95907	8.58816	#DIV/0!	0.0273332	0.194451
P09671;A0A3B2WBF0	Superoxide dismutase [Mn], mitochondrial	Sod2	0.0397829	0.0166869	-0.139427	0.0738578	0.190437	-0.234689	-0.00912443	-0.529879	0.929953	1.26714	0.790889	1.02231	0.902799	0.848912	0.478002	0.941167	0.456066	0.000447169	0.195776
Q924H7;E9Q5D5;F6Z247;E9PZH6	WW domain-containing adapter protein with coiled-coil	Wac	-1.32538	0.554979	0.486076	-0.451704	0.243625	0.206749	0.354583	0.517356	0.593312	0.961277	0.737293	1.26527	-1.1315	-0.0534343	0.510208	1.15364	0.365716	0.0354034	0.197135
Q80TJ1;K4DI76;J3QJW3	Calcium-dependent secretion activator 1	Cadps	0.104747	0.23365	-0.145281	-0.243515	0.0685806	-0.331847	0.112663	-0.72028	-0.675598	-1.48029	-0.624082	-0.865817	-1.26552	-2.21487	-0.993876	-0.996152	0.420806	0.00407623	0.197385
Q99KB8;A0A0R4J052;G5E8T9;E9PYA3;E9Q2H8;D3YWI0	Hydroxyacylglutathione hydrolase, mitochondrial	Hagh	0.0594303	0.0558245	-0.0965899	-0.024367	0.186298	-0.153848	0.148155	-0.519507	-0.332447	-0.402799	0.0140897	-0.282431	-0.36135	-0.326775	-0.72894	-0.351338	0.722126	0.0468245	0.19926
P54923	[Protein ADP-ribosylarginine] hydrolase	Adprh	-0.176928	0.408527	0.0521644	-0.412604	0.21691	0.749708	0.988351	0.901434	0.68835	0.967525	0.861866	1.07336	0.542773	0.315322	0.537085	1.07305	0.0220243	0.00169768	0.199999
Q9WVM1	Rac GTPase-activating protein 1	Racgap1	-0.548759	0.453372	-0.287508	0.173561	-0.551908	-0.0990454	-0.29246	-0.323506	-0.693416	-0.93181	-1.11529	-0.658318	-1.87095	-1.12087	-0.913841	-0.872941	0.281987	0.0327523	0.201723
Q9CY57;E9PW20;D3YZA1;D3Z7T7	Chromatin target of PRMT1 protein	Chtop	-0.144505	-0.194405	0.152848	0.15006	-0.0598966	-0.0376154	0.360522	0.22269	0.709691	0.559589	0.0278656	0.767872	-0.291358	0.398185	0.446641	0.271903	0.379733	0.033423	0.204114
Q8BWW4;G3X9Q6;E9Q066;A0A2R8VKL5	La-related protein 4	Larp4	-0.169348	0.168451	0.240317	-0.311771	-0.0509238	-0.0756605	-0.0259509	0.140889	0.561519	0.679977	0.350717	0.323894	0.386529	0.0984335	0.31756	0.460839	0.997993	0.0173721	0.205004
Q8VBV7	COP9 signalosome complex subunit 8	Cops8	-0.238521	0.196376	0.154007	-0.161791	-0.12102	-0.255125	0.250942	0.328386	0.180921	0.725325	0.7687	0.693504	0.0489474	0.274387	0.545031	0.538971	0.702317	0.013484	0.2054
P21661	Neuroendocrine convertase 2	Pcsk2	-0.457752	0.414186	0.0111957	-0.102307	0.546412	0.123993	0.0567242	-0.339303	-1.09387	-1.46347	-0.883155	-0.750813	-1.52396	-0.994892	-1.4816	-1.27988	0.628527	0.00943499	0.205759
Q9ERG0	LIM domain and actin-binding protein 1	Lima1	-0.28901	-0.156446	0.523798	-0.240301	-0.0190127	-0.0590725	-0.0155656	0.0933602	0.526565	0.799728	0.963	0.783327	0.648317	0.546053	0.513012	0.771512	0.996253	0.00748168	0.20716
Q64345	Interferon-induced protein with tetratricopeptide repeats 3	Ifit3	-10.8234	-0.0490842	-4.29502	1.57626	-10.8234	-0.156784	-10.8234	0.688929	4.19215	4.03607	4.46929	4.08535	4.23399	4.02685	3.87902	3.91943	0.65748	2.15551e-05	0.213217
P28063;G3UZW8	Proteasome subunit beta type-8;Proteasome subunit beta type	Psmb8	-1.05172	0.0578488	0.265593	0.350004	0.458663	0.066779	-0.039416	-0.0346725	4.62433	4.68869	4.91366	4.62135	4.5069	4.46895	4.70453	4.65859	0.664033	1.30682e-06	0.214117
P21126	Ubiquitin-like protein 4A	Ubl4a	0.240303	0.0850848	0.326393	-0.988117	0.447147	0.219034	0.95276	1.11678	0.139255	1.66108	1.00576	1.25011	0.0382046	0.427429	0.77109	0.959225	0.064423	0.0449667	0.214182
Q9WTV6	Ubl carboxyl-terminal hydrolase 18	Usp18	0	0	0	0	0	0	0	0	12.134	10.8315	12.0677	10.4157	10.9219	10.639	10.8135	11.033	#DIV/0!	0.010401	0.215793
Q8BWZ3	N-alpha-acetyltransferase 25, NatB auxiliary subunit	Naa25	-0.191813	-0.00404821	0.62286	-0.767652	0.561394	0.0633745	-0.293357	-0.923811	0.919878	0.585851	0.58414	0.474374	0.668277	0.594325	-0.205227	0.302522	0.907977	0.0463821	0.218765
Q9R0B9;E9Q718	Procollagen-lysine,2-oxoglutarate 5-dioxygenase 2	Plod2	0.293853	-0.25505	-0.0427442	-0.0509119	0.431071	0.198065	-0.0586995	0.791995	-1.88894	-5.29156	-1.38529	-1.79261	-4.29075	-1.92477	-3.59232	-3.78801	0.158095	0.000493491	0.219283
P57787;B1ATM1;B1ATM2	Monocarboxylate transporter 4	Slc16a3	-0.0214144	-0.254488	0.367121	-0.173527	0.591284	0.539845	-0.0348291	0.239936	-0.635658	-0.640105	-1.28338	-0.279593	-2.53047	-0.373116	-2.37708	-1.06058	0.131233	0.0310425	0.219406
Q9JLV5;E9Q4T8	Cullin-3	Cul3	0.016133	-0.0894504	0.116178	-0.051378	-0.182092	-0.257073	-0.186914	-0.31125	-0.205243	-0.26399	-0.268621	-0.364104	-0.172281	-0.642737	-0.43402	-0.42881	0.00634706	0.00326797	0.220376
Q8K298	Actin-binding protein anillin	Anln	0.0575321	0.287944	0.089308	-0.567988	-1.03762	0.0202784	0.122038	0.143525	-1.46036	-0.482965	-2.22975	-1.29031	-0.942018	-2.53004	-2.78678	-3.73287	0.696618	0.0104103	0.22339
Q60930;G3UX26;A0A286YCR8;D3YZT5	Voltage-dependent anion-selective channel protein 2	Vdac2	0.110247	-0.036992	0.0306772	-0.113394	-0.0825175	0.144487	0.00854245	-0.0253017	0.369358	0.403746	0.127652	0.337105	-0.31337	0.491199	-0.0281153	0.0684172	0.847475	0.007416	0.228536
B7ZWM6;Q3UTJ2;A0A0R4J1W0;A0A0R4J1X5	Sorbin and SH3 domain-containing protein 2	Sorbs2	-0.0764299	-0.187501	0.048241	0.188362	0.0195816	0.361098	0.119797	-0.308998	-0.215417	-0.205679	-0.300175	-0.398401	-0.466143	-0.437734	-0.706852	-0.167633	0.687396	0.0297109	0.229127
Q6EDY6;D3Z030;F7AI27	Leucine-rich repeat-containing protein 16A	Lrrc16a	-3.16973	-3.16973	1.87445	-3.16973	4.11365	3.22796	2.8801	2.05922	3.82618	0.914894	4.41785	5.01367	2.4587	-3.16973	2.81859	4.14894	0.0269088	0.0434702	0.230655
P79568;P14430;E9PWT4;E9QJR9;P14429	H-2 class I histocompatibility antigen, Q8 alpha chain;H-2 class I histocompatibility antigen, Q7 alpha chain	H2-Q6;H2-Q8;H2-Q7	0	0	0	0	0	0	0	0	10.5095	10.3482	10.0204	10.1463	9.45026	10.2891	9.93787	10.2053	#DIV/0!	1.1235e-05	0.232427
Q8K154;E9PZ30		Ugt2b34	-1.11979	-0.396298	0.564262	0.380068	0.573265	0.0712994	1.12526	0.477268	1.46679	0.698065	0.730268	1.6583	-8.2557	1.27167	1.32775	-8.2557	0.165688	0.028955	0.235467
Q06138	Calcium-binding protein 39	Cab39	-0.0893935	0.0424636	0.0680057	-0.0262865	-0.0540423	0.0998853	0.379186	0.356623	0.224346	0.306941	0.325302	0.107582	0.18571	-0.639514	-0.111762	0.355791	0.121914	0.00774732	0.240918
Q99P31;A0A0U1RPF2	Hsp70-binding protein 1	Hspbp1	-0.360184	-0.13556	0.44426	-0.0739977	0.419958	-0.139416	0.370355	0.524935	0.343708	0.813902	0.435884	0.456424	0.34856	0.693451	-0.246011	-0.0703926	0.203338	0.0388878	0.242611
Q8R1Q8	Cytoplasmic dynein 1 light intermediate chain 1	Dync1li1	0.00378449	0.0215321	-0.0994838	0.0689729	0.105463	0.436255	0.146024	-0.0657497	0.255636	0.347311	0.214605	0.153402	-0.098746	-0.0185583	-0.116596	0.428924	0.207501	0.0043268	0.243318
Q4VA93;P20444	Protein kinase C;Protein kinase C alpha type	Prkca	0.0944007	-0.284398	0.151084	0.00128389	0.482285	0.00189989	0.512028	0.065675	-1.14461	-1.44053	-0.890529	-0.695101	-1.29079	-1.18545	-1.16874	-1.31446	0.143025	0.000918901	0.246153
Q7TSH6		Scaf4	0.238314	-0.249883	0.229489	-0.309355	-0.804501	-0.0406833	-0.141292	0.854436	0.179188	0.900746	0.647203	0.440885	0.416048	0.566098	-0.0814142	0.233629	0.825553	0.0419613	0.250038
Q9Z0X1;B1AU25	Apoptosis-inducing factor 1, mitochondrial	Aifm1	-0.153412	0.0986683	0.082691	-0.042305	-0.277082	-0.208717	0.263883	-0.227083	0.443175	1.01335	0.421998	0.535889	0.411436	0.413367	0.297712	0.524588	0.537425	0.0170008	0.254293
P62996;F8WJG3	Transformer-2 protein homolog beta	Tra2b	-0.0188678	-0.078908	0.414991	-0.448254	0.529538	0.0326624	-0.303074	0.00925244	0.496751	0.777241	0.336398	0.72675	-0.0248857	0.790866	-0.233967	0.436948	0.710919	0.0202773	0.256557
Q91VW3	SH3 domain-binding glutamic acid-rich-like protein 3	Sh3bgrl3	-0.0186987	0.0273389	0.179897	-0.21601	0.131094	0.268267	0.0871584	-0.0646372	0.875734	0.493319	1.07086	0.417671	1.05243	-0.0817386	0.0600963	0.04148	0.334399	0.0122898	0.265458
P54729;A0A0G2JGQ4	NEDD8 ultimate buster 1	Nub1	-0.309826	0.131396	0.316357	-0.229846	-0.370791	0.00114824	0.315821	-0.36637	1.3484	1.49742	1.31895	1.10687	1.33612	0.996757	1.11409	1.28373	0.747875	0.00012332	0.266919
Q9Z0N1;Q9Z0N2;A2AAW9	Eukaryotic translation initiation factor 2 subunit 3, X-linked;Eukaryotic translation initiation factor 2 subunit 3, Y-linked	Eif2s3x;Eif2s3y	0.141729	-0.00138717	-0.156748	0.000994925	-0.107235	-0.0963605	0.151008	-0.246271	0.0679505	0.195524	0.304577	0.242928	0.0578926	0.0101845	0.162694	0.234157	0.538682	0.0379885	0.26802
P14246	Solute carrier family 2, facilitated glucose transporter member 2	Slc2a2	0.204967	-0.225305	0.0636117	-0.0787968	0.0711232	-0.209235	-0.289661	-0.269195	-0.126827	-0.724571	-0.824984	-0.486683	-1.18773	-0.701601	-0.427895	-0.998017	0.240478	0.0251895	0.270725
Q9ESY9	Gamma-interferon-inducible lysosomal thiol reductase	Ifi30	0.698418	-0.714592	-1.06185	0.366119	0.746383	0.353597	-1.1228	0.439094	0.77445	0.898417	1.02899	0.578118	-0.498239	0.929715	1.00798	-1.04007	0.627408	0.039717	0.271763
Q3U2G2;Q61316	Heat shock 70 kDa protein 4	Hspa4	0.0142574	0.036008	0.101852	-0.165458	0.0951638	0.0907718	0.0600555	-0.0396327	0.105419	0.230629	0.45501	0.238672	0.214223	0.0617477	0.0371133	0.268473	0.435591	0.0333775	0.272309
Q9JIF7	Coatomer subunit beta	Copb1	0.0105425	-0.0305242	0.065306	-0.0479731	-0.0246757	0.137596	0.238765	0.0538832	0.0935056	0.0671787	0.266027	0.200584	-0.051882	-0.132763	-0.012193	0.293863	0.151351	0.0272564	0.279647
E9PYK3		Parp4	-1.238	0.116311	0.617933	-0.0627989	-0.461158	-1.03661	-1.05231	0.775627	0.999777	1.84524	1.89045	1.46215	1.01541	1.42839	1.58855	1.10395	0.703742	0.00467622	0.281026
Q6PHU5	Sortilin	Sort1	0.0454196	-0.33074	-0.104275	0.31338	1.23752	0.260272	0.344544	-0.763625	-8.89258	-1.59132	-1.99401	-8.89258	-8.89258	-8.89258	-8.89258	-2.78859	0.387817	0.000529933	0.28227
Q91V55;P97461;D3YYM6;D3Z1S8	40S ribosomal protein S5;40S ribosomal protein S5, N-terminally processed	Rps5	0.0197314	0.163756	-0.0512281	-0.150537	0.377165	-0.359655	-0.0854257	0.28673	0.241882	0.318767	0.795767	0.284696	0.431101	0.00365758	0.293876	0.133532	0.658459	0.0467846	0.283835
D3YW23;P17515	C-X-C motif chemokine;C-X-C motif chemokine 10	Cxcl10	-7.76736	-7.76736	0.715508	1.2319	-7.76736	-7.76736	-7.76736	-7.76736	7.71345	7.71846	7.37363	7.24763	6.88234	7.26259	7.0011	7.74541	0.143971	1.88513e-05	0.284672
Q9R0E2	Procollagen-lysine,2-oxoglutarate 5-dioxygenase 1	Plod1	0.228354	-0.299998	0.144213	-0.134285	0.0515213	-0.329533	-0.126325	0.136069	-1.35518	-2.35611	-0.444509	-0.784546	-2.87966	-1.20739	-1.53599	-1.46116	0.733543	0.0106751	0.285724
E9QJX9;Q9QXJ2;Q9WVL2	Signal transducer and activator of transcription;Signal transducer and activator of transcription 2	Stat2	0.0800143	-0.019309	0.32252	-0.502764	-0.0848945	-0.378296	0.367793	-1.19072	3.50306	3.23776	3.42637	3.60783	3.55597	3.09144	3.12574	3.36369	0.530947	2.82527e-06	0.291572
P36371	Antigen peptide transporter 2	Tap2	0.840619	0.44488	-0.250736	-7.05634	-0.298826	-0.113859	-0.12986	2.56179	6.2578	6.15428	4.76668	6.20941	4.00584	5.99105	6.02186	4.58149	0.418997	0.00197403	0.29264
G3UWE2		F830016B08Rik	0	0	0	0	0	0	0	0	9.06479	10.0421	9.13461	8.31673	7.89141	0	0	9.91067	#DIV/0!	0.00738011	0.293545
P27601	Guanine nucleotide-binding protein subunit alpha-13	Gna13	0.276972	0.0228746	-0.363744	-0.00690641	-0.547742	-0.788384	0.337814	-0.651478	1.04167	1.16164	0.885763	1.43705	0.757808	1.20585	1.02516	0.809767	0.294871	0.00100099	0.293655
Q9JIX8;F6RJ39;B8JJ91	Apoptotic chromatin condensation inducer in the nucleus	Acin1	0.390658	-0.219332	0.00192162	-0.271055	0.160374	0.56968	0.122851	0.0832432	0.737456	0.197452	0.666264	0.702226	0.307	0.322858	0.0117985	0.749933	0.253844	0.0212882	0.295857
Q99PG2	Opioid growth factor receptor	Ogfr	-0.168442	0.0330892	0.386058	-0.358125	0.190047	-0.643085	-0.00668384	0.147516	1.36433	1.47133	1.79683	1.54334	1.52597	1.18867	1.42029	1.50109	0.863527	0.000133392	0.30069
Q3UUQ7	GPI inositol-deacylase	Pgap1	-0.198431	0.14602	0.134739	-0.113887	-0.339869	-0.335945	-0.321248	-0.314692	-0.441038	-0.603749	-1.70868	-0.720832	-1.97191	-0.640511	-0.84628	-2.26498	0.0147987	0.00907401	0.302041
Q3V188	Poly(U)-specific endoribonuclease	Endou	0.372619	-0.314951	0.0466247	-0.203277	0.183577	-0.246837	0.041832	-2.22093	0.699105	0.727932	0.278232	1.04369	-0.277776	0.200837	0.912033	0.51135	0.436699	0.0207374	0.303995
O35459;F7B227	Delta(3,5)-Delta(2,4)-dienoyl-CoA isomerase, mitochondrial	Ech1	0.154997	-0.376315	0.252279	-0.112333	0.150762	0.139992	0.0565781	-0.0481783	-1.39097	-2.34998	-0.0749718	-0.812204	-1.7457	-1.68309	-0.931787	-2.55577	0.604756	0.0435918	0.305522
Q8BTS3		Gbp9	0	0	0	0	0	0	0	0	6.21319	6.47519	7.84724	7.65086	6.85044	6.75045	6.77863	6.38747	#DIV/0!	0.00941507	0.307697
Q8BFY6	Peflin	Pef1	-0.206711	-0.322618	-0.21161	0.55611	-0.784622	0.719682	0.907449	0.929006	0.492836	1.5159	0.518025	1.61786	1.04028	0.830085	0.824831	-0.0661437	0.201565	0.0459064	0.318423
Q810B6	Rabankyrin-5	Ankfy1	0.105806	-0.041135	0.347498	-0.557109	0.255323	0.197799	0.0978371	-0.0542515	0.868518	0.613131	1.00791	0.767935	0.634147	0.682807	0.650581	0.869216	0.510066	0.00300581	0.323391
P35564	Calnexin	Canx	0.0280353	-0.0800815	-0.0322063	0.0792238	-0.416265	-0.113186	-0.0858292	-0.107323	-0.184397	-0.140791	-0.742261	-0.295351	-1.90307	-0.168629	-0.231619	-1.05824	0.0698594	0.0356202	0.324621
Q60953;D3Z3A6;D3YXR5;F7BTZ2	Protein PML	Pml	-1.25114	0.107257	0.84913	-0.511916	-0.191272	-0.437506	1.07388	0.356697	2.44918	1.81724	2.23753	1.99435	2.02666	2.13737	1.61051	1.9849	0.581271	0.000587913	0.32522
A2ADH1;Q9CQY5	Magnesium transporter protein 1	Magt1	0.380322	-0.555696	0.235275	-0.24998	0.164702	-0.181268	0.298481	0.146688	-0.952891	-0.673318	-3.02803	-1.24416	-4.78273	-1.59101	-0.924416	-2.87653	0.618291	0.018517	0.32542
Q04863;Q8K220;A0A140LI24;A0A140LI46;A0A140LJD6	Transcription factor RelB	Relb	0	0	0	0	0	0	0	0	9.84201	8.54071	9.04981	8.96911	7.90544	8.89599	9.32221	8.41287	#DIV/0!	0.0026383	0.326604
Q8CFB4;Q8BMN7	Guanylate-binding protein 5	Gbp5	-7.84552	0.525918	0.590988	0.0697367	-7.84552	0.564224	0.70496	2.41549	6.39857	6.1914	6.45039	6.44112	6.40316	6.11687	6.01813	6.42631	0.384998	3.20491e-07	0.327158
P70288;A0A0R4J008;Q8BQ10	Histone deacetylase 2	Hdac2	-0.221199	-0.178718	0.217727	0.131932	0.337616	0.319919	0.548442	-0.419525	-0.384851	-0.185153	-0.459922	-0.418762	-0.357585	-0.941892	-0.906344	-0.180568	0.329816	0.0386935	0.336248
Q6PAJ1	Breakpoint cluster region protein	Bcr	-0.0481703	-0.548661	0.138832	0.319814	0.270001	0.360404	0.621543	-0.0388854	0.412923	0.41026	0.591146	0.396159	-0.0988788	-0.164732	0.444649	0.657895	0.18509	0.0277545	0.339114
Q9CSU0;F6YB25;A0A0R4J195;F7DAY5	Regulation of nuclear pre-mRNA domain-containing protein 1B	Rprd1b	-0.11454	-0.0660819	0.0511012	0.117747	0.152541	0.390541	0.614839	0.22295	0.431269	0.550281	0.767332	0.601763	-0.00614533	0.366564	-0.0104457	0.895791	0.031855	0.000835839	0.342928
Q8BJF9;A0A338P7L8	Charged multivesicular body protein 2b	Chmp2b	0.13648	-0.0317043	0.628348	-1.40842	0.159159	-0.307166	-1.42604	-0.901563	1.26614	0.672144	1.22057	0.460821	0.777504	0.446012	-0.592624	1.1642	0.354544	0.0397015	0.344567
D0QMC3;A0A087WRA4	Myeloid cell nuclear differentiation antigen-like protein	Mndal	0	0	0	0	0	6.50231	0	0	10.5195	9.70311	9.55471	9.82927	6.33302	10.279	9.94666	8.5409	0.355918	0.00088363	0.346593
P11438	Lysosome-associated membrane glycoprotein 1	Lamp1	-0.138287	0.273278	-0.0996665	-0.0746027	-0.0329254	0.165908	0.131099	0.387159	0.199464	0.524857	0.634961	0.215082	0.294415	0.183046	0.547954	-0.442958	0.246831	0.038491	0.34793
Q9CWM4;Q9CQF7;A0A494BBK3	Prefoldin subunit 1	Pfdn1	-0.0600174	-0.177336	0.254975	-0.0542454	0.103312	0.55579	-0.133589	0.378459	0.837395	0.542859	0.658854	0.681249	0.677074	0.62356	0.654839	0.450821	0.22584	0.000714574	0.354381
Q9Z0U1;A0A3B2WBH9;A0A3B2WCN9	Tight junction protein ZO-2	Tjp2	-0.668029	0.325846	0.0652524	0.0989133	-0.171049	-0.124477	-0.0961077	-0.367073	1.56718	2.12211	1.4738	1.36848	1.3394	1.4179	1.25655	1.72405	0.410554	0.00217281	0.36079
Q8CFI7	DNA-directed RNA polymerase II subunit RPB2	Polr2b	0.0391631	-0.113549	-0.105075	0.161455	0.0647849	-0.141671	0.178239	0.079091	0.157582	0.16256	0.247597	0.200423	0.209283	0.159113	0.0223111	0.190781	0.612919	0.0267797	0.361667
Q78PG9	Coiled-coil domain-containing protein 25	Ccdc25	0.0810563	0.16512	0.203476	-0.578889	0.157852	0.584587	0.709337	-0.205134	1.09346	0.921094	0.805867	0.690691	0.361514	0.612143	1.1222	0.615698	0.228717	0.00170998	0.36459
Q9DCE9		Igtp	-2.92128	-11.804	-4.06801	1.92907	-4.09488	-2.73707	-2.97231	-5.42087	4.62858	4.93499	4.87569	4.62941	4.72614	4.86929	4.50584	4.47499	0.368818	6.25128e-06	0.367264
Q9EQF6	Dihydropyrimidinase-related protein 5	Dpysl5	0.082454	0.169767	-0.0282366	-0.258965	-0.173462	-0.0646957	0.30884	-0.0142428	-0.435895	-0.22465	-0.13266	-0.461867	-0.482893	-0.248627	-0.289198	-0.898349	0.861825	0.0470336	0.370294
Q8VI94	2-5-oligoadenylate synthase-like protein 1	Oasl1	1.94401	-4.30039	-4.30039	-4.30039	-4.30039	-4.30039	-4.30039	-4.30039	7.0829	7.80264	7.04254	6.85386	7.35396	6.89944	6.71626	6.80594	0.355918	0.000813725	0.373197
Q3U1V6	Ubiquitin-conjugating enzyme E2 variant 3	Uevld	-4.93509	-4.93509	1.33539	0.496905	3.55275	3.10457	3.15359	2.72972	1.77605	2.99935	3.3546	3.14798	2.96692	1.64348	2.15339	2.9715	0.000592634	0.00593945	0.375208
Q99J45;D3YUV1	Nuclear receptor-binding protein	Nrbp1	-0.370535	-0.0139685	0.218049	0.101623	1.38743	0.280011	1.01527	0.879486	1.32832	0.81508	0.877785	0.504847	0.906972	0.586448	0.940176	0.11604	0.0218804	0.0110481	0.37585
P17047	Lysosome-associated membrane glycoprotein 2	Lamp2	0.1211	0.00218662	-0.124509	-0.00925822	0.172722	0.0403093	-0.0770116	-0.0276934	0.441868	0.557756	0.675984	0.477522	0.203336	0.729449	0.443109	0.202351	0.700107	0.00037408	0.376607
Q8BLY2	Probable threonine--tRNA ligase 2, cytoplasmic	Tarsl2	-0.349873	0.0912198	0.0993421	0.109416	-0.0678223	0.271585	0.185551	0.276037	-0.74855	-0.183035	-0.415857	-0.346242	-0.777484	-0.42623	-0.778841	-0.333342	0.223087	0.0381025	0.376653
P40630;A0A0R4J1N9	Transcription factor A, mitochondrial	Tfam	0.0449547	-0.0669335	0.121406	-0.111087	0.211498	-0.49508	0.0991323	-0.165673	0.705207	0.46342	0.100272	0.416856	0.143654	0.652128	0.290612	-0.482983	0.70279	0.0257018	0.377561
Q9CYC6	m7GpppN-mRNA hydrolase	Dcp2	0	0	0	0	6.77404	0	6.713	0	8.10204	6.97579	6.41991	6.59926	0	0	6.29959	7.87742	0.134121	0.0163067	0.379588
Q8BRT1;E9Q8N5;Q08EB6;Q08EB5;F7DCH5	CLIP-associating protein 2	Clasp2	-0.145619	0.0494728	0.0797401	0.00618177	0.0354408	-0.117629	0.357972	-0.0737729	0.0921935	0.306942	0.375205	0.179636	0.0428035	0.0851295	0.164571	0.32315	0.632876	0.0251632	0.379921
Q6ZQ88;A3KG93;G8JL40	Lysine-specific histone demethylase 1A	Kdm1a	-0.0241714	0.2131	-0.122456	-0.0910852	-0.389136	-0.270457	0.175744	-0.0738808	-0.288625	-0.563317	-0.14505	-0.566042	-0.900707	-0.71096	-0.0231598	-1.14124	0.431851	0.025829	0.381336
Q8K3X4	Interferon regulatory factor 2-binding protein-like	Irf2bpl	-4.80437	-4.80437	0.916159	1.02952	2.1735	1.25939	-4.80437	1.24238	2.32382	2.7757	1.46765	2.66709	3.09874	3.59535	-4.80437	3.46753	0.261585	0.00739355	0.386154
A7UAK4;A2AUP3;A2AUP5;A2AUP1;Q7TS91;A2AUP4;A7UAK8;Q3U3S6;A7UAK5;A0A0A6YY64;A0A0A6YW89		Pfkfb3	-1.40095	0.93442	0.359812	-1.2279	0.702793	0.0645844	-0.150369	-1.0593	1.55713	2.39285	1.93971	2.48479	1.69612	2.20646	2.13014	1.26257	0.976263	0.00322414	0.388587
P17710;G3UVV4	Hexokinase-1;Hexokinase	Hk1	-0.385176	-0.0347746	0.213369	0.135847	-0.337482	-0.409657	-0.324541	-0.0879873	0.313293	0.326062	0.509976	0.322124	0.189385	0.413485	0.197315	0.381585	0.111907	0.0238408	0.388706
Q921K2		Parp1	0.0850088	0.0802012	-0.128478	-0.0478988	-0.0864746	0.0460387	-0.0617395	0.149364	-0.189954	-0.180189	-0.172832	-0.160444	-0.266078	-0.116689	-0.369689	-0.16656	0.849789	0.0186652	0.390814
P56375	Acylphosphatase-2	Acyp2	-0.234501	0.664094	-0.0283655	-0.773695	0.174046	0.594027	0.0112677	0.530225	0.803617	0.858342	1.08588	1.24296	1.28875	0.67642	0.765433	0.323831	0.306604	0.00749575	0.3968
G3UY19;G3XA79		Prc1	-0.45529	-0.121603	0.470088	-0.0494914	0.698616	-0.0568934	0.212344	-0.195996	-0.823717	-0.429441	-1.07384	-1.15393	-1.59981	-0.962738	-0.689034	-1.17977	0.504749	0.0279499	0.399009
Q9R0P5	Destrin	Dstn	0.183417	0.0569528	-0.0530128	-0.217186	-0.144329	0.103575	0.0112506	0.192393	0.263951	0.214462	0.381983	0.360944	0.582302	-0.123595	0.162258	-0.162532	0.689314	0.0126139	0.399647
Q4PZA2	Endothelin-converting enzyme 1	Ece1	-0.036075	-0.157858	-0.00786547	0.181138	0.239364	-0.103633	0.0282892	0.0821023	-0.88552	-0.62825	-0.672672	-0.713081	-0.564363	-0.919885	-0.924869	-0.885763	0.532641	0.000356537	0.406762
Q60598;Q921L6	Src substrate cortactin	Cttn	-0.158015	0.0497057	0.205635	-0.127375	0.240073	0.230564	0.268837	0.324343	0.145112	0.417628	0.38447	0.17316	0.301899	0.0699169	0.0576166	0.331295	0.0171962	0.0406858	0.411395
Q921W2;P70318;D3Z3Y4;D6RGU1	Nucleolysin TIAR	Tial1	0.0359895	-0.229525	0.0680946	0.102314	0.585651	0.155736	0.29114	-0.243663	0.293554	0.439187	0.251706	0.25105	-0.285602	0.295034	0.129454	0.472884	0.282724	0.00916746	0.424382
Q9JKF6;A0A668KLC0	Nectin-1	Pvrl1	-0.524467	-0.0566163	0.347636	0.0986801	0.282308	0.457124	-0.093702	-0.115685	-0.824779	-1.17474	-2.85027	-1.86505	-2.49956	-2.15069	-1.06628	-3.02236	0.516766	0.0054866	0.424737
P70460	Vasodilator-stimulated phosphoprotein	Vasp	0.0360491	-0.0903998	0.145741	-0.106037	0.0629983	0.195234	0.338986	-0.00592405	0.240234	0.572178	0.386505	0.188298	0.400695	-0.0455115	0.01306	0.461378	0.17158	0.0197147	0.432344
A0A0R4J083;P51174	Long-chain specific acyl-CoA dehydrogenase, mitochondrial	Acadl	-0.276996	-0.108554	0.202465	0.132922	0.424841	0.195768	0.0128326	0.227034	0.822802	0.57538	0.293868	0.827765	0.223848	0.507764	0.589587	0.702147	0.152008	0.00963705	0.440952
Q61081;A0A1L1STC0	Hsp90 co-chaperone Cdc37;Hsp90 co-chaperone Cdc37, N-terminally processed	Cdc37	-0.0786443	0.17463	0.06156	-0.183139	-0.0927507	0.193819	-0.230919	-0.0332766	0.413048	0.544168	0.5273	0.408741	0.801087	0.211179	-0.041605	0.156561	0.794498	0.000938945	0.441313
Q9CXZ1;E9QPX3	NADH dehydrogenase [ubiquinone] iron-sulfur protein 4, mitochondrial	Ndufs4	0.265351	0.144924	-0.355803	-0.134534	0.69882	0.0362748	0.159693	0.540552	0.446105	0.379333	0.580567	0.134611	0.170428	0.120596	0.241063	0.55465	0.121971	0.0467	0.443208
Q62351;Q8C872	Transferrin receptor protein 1	Tfrc	-0.142073	0.0183804	0.212568	-0.116828	-0.0340242	0.0995326	0.0861127	0.163776	-0.411579	-0.409512	-0.384743	-0.0989572	-0.372252	-0.27424	-0.606872	-0.38976	0.411518	0.0342605	0.447168
Q9R233;Q3TCU5	Tapasin	Tapbp	0.0786676	0.451634	-0.13288	-0.589962	-0.455876	-0.155871	0.0943722	-0.36489	7.12529	6.77615	5.51159	6.79353	5.63638	6.80276	6.69375	5.89702	0.45345	0.00231275	0.450591
Q8BK72;A0A338P7I7	28S ribosomal protein S27, mitochondrial	Mrps27	-0.639868	-0.175	0.691825	-0.222406	1.20867	-0.484052	-0.0614458	-0.703591	0.0210032	1.31686	1.50522	1.1144	-0.814413	1.44342	-1.03004	1.28551	0.749421	0.0458165	0.452621
P16330	2,3-cyclic-nucleotide 3-phosphodiesterase	Cnp	-5.55942	1.51701	0.131731	-5.55942	-5.55942	-5.55942	2.17351	0.716779	2.77558	3.08051	2.1621	1.99695	-5.55942	2.78932	4.39138	3.33854	0.676491	0.00727374	0.457409
Q9CYL5;B1AWD6	Golgi-associated plant pathogenesis-related protein 1	Glipr2	-0.821746	-1.21933	0.46399	0.700805	-1.65987	-0.353063	-9.8444	-1.04	3.04591	3.54781	2.99164	3.48563	2.52059	3.46435	2.96033	3.29116	0.124339	0.000132491	0.461997
Q8BQM4;E9PWH6	HEAT repeat-containing protein 3	Heatr3	-0.301754	-0.0610471	0.374772	-0.0992297	-1.16157	-0.928624	0.967479	0.710914	1.14343	1.43047	0.645846	0.692291	1.04792	0.669521	1.12289	0.162397	0.734875	0.0120512	0.464448
Q3URU2;A0A5F8MPW9	Paternally-expressed gene 3 protein	Peg3	-0.252007	0.0985999	-0.119249	0.225117	-0.585613	-0.193321	-0.151112	0.130812	-1.20633	-0.766595	-0.098835	-0.459132	-0.560153	-0.480512	-1.77335	-0.85846	0.351067	0.0438224	0.468059
Q9Z0M9;A0A1B0GT50	Interleukin-18-binding protein	Il18bp	0	0	0	0	0	0	0	0	11.6352	11.3002	12.4498	12.2044	11.4693	11.9492	11.9418	11.5321	#DIV/0!	0.00125902	0.474768
E9PVX6		Mki67	-0.0018878	-0.0863339	0.0976107	-0.0153822	-0.201291	-0.128105	0.0653684	-0.00384129	-1.0779	-0.826923	-3.61107	-0.962045	-3.35625	-0.930962	-1.24924	-3.04236	0.403889	0.00198179	0.475044
Q62280;A0A3Q4EGQ6;Q8VHA8;Q8BKL1;Q8BJJ6;A0A3Q4EI07	Protein SSXT	Ss18	-0.551224	0.168195	0.179	0.0865234	-0.0678945	-0.805143	0.371522	1.04962	-0.757386	-0.825728	-0.694739	-0.893393	-1.58455	-0.869267	-0.551496	-0.923135	0.532536	0.00803846	0.481954
P0C913;A0A1W2P6X0	Overexpressed in colon carcinoma 1 protein homolog		-9.96047	-0.121537	-0.4174	1.22096	0.706893	1.82824	1.91702	-9.96047	2.02622	2.44778	1.75162	2.41073	2.2004	2.01357	1.77756	2.15746	0.266509	0.00226809	0.484519
Q3TA68;Q3TAQ9		Wdr36	-0.236399	-0.167115	-0.528528	0.64824	-0.793864	0.786179	-0.696816	0.968054	1.80733	1.92041	1.39622	2.54944	-0.318029	2.23512	2.40746	-0.318409	0.613698	0.0060301	0.485607
P70122;F6TN03	Ribosome maturation protein SBDS	Sbds	-0.212101	0.111508	0.104032	-0.0268069	0.00202954	0.0360869	-0.102605	-0.184384	0.219167	0.391549	0.29483	0.242986	0.310328	0.155955	0.155856	0.338669	0.530006	0.010608	0.488323
Q8C7X2;Z4YJW0	ER membrane protein complex subunit 1	Emc1	-0.0662061	-0.0601567	0.0129936	0.106545	0.0827889	0.238631	-0.286086	0.180345	-0.279218	-0.204724	-0.373206	-0.0308443	-0.7632	-0.455336	0.105631	-0.480465	0.591562	0.0373578	0.49179
F7BWT7	Tetraspanin-15	Tspan15	0.432933	-0.130402	0.0675155	-0.538393	0.518135	-0.673513	-0.232243	-0.29417	0.691897	0.635718	0.554132	0.367292	0.612999	0.414456	0.719553	-0.166243	0.768235	0.0210261	0.492783
Q99MN1;Q8R2P8	Lysine--tRNA ligase	Kars	-0.0985692	0.0638052	-0.0249982	0.053807	-0.0464443	0.2556	0.192485	0.0862605	0.35439	0.615252	0.461094	0.389198	0.411625	0.205479	0.380732	0.550789	0.15144	0.000946868	0.497245
D3Z2R5		Sepn1	-0.0473345	0.136116	0.0883559	-0.200619	0.112855	0.791007	-1.45291	-9.16886	-9.16886	-0.792548	-1.41288	-1.61968	-9.16886	1.79701	-9.16886	-2.09405	0.61526	0.00194362	0.505521
Q99K94	Signal transducer and activator of transcription	Stat1	0	0	0	0	0	0	0	0	9.13754	8.87812	9.38759	9.27212	9.11215	9.25679	0	9.45512	#DIV/0!	9.82559e-06	0.514831
P70279	Surfeit locus protein 6	Surf6	-1.06755	0.232578	0.313381	0.144467	-0.110612	0.194635	-0.0526163	0.471862	-1.82981	-1.40838	-1.03607	-0.510837	0.632078	-1.1579	-0.372514	-8.98072	0.626267	0.0349572	0.520196
G3X8T3;P16675	Carboxypeptidase;Lysosomal protective protein;Lysosomal protective protein 32 kDa chain;Lysosomal protective protein 20 kDa chain	Ctsa	-0.17733	-0.00687442	-0.0984991	0.246605	-0.162613	-0.127714	-0.29663	-0.309382	-0.396845	-0.448577	-0.592704	-0.333734	-1.15241	-0.460063	-0.289006	-0.460253	0.0937016	0.0105124	0.527402
A0A494BA88;A0A494B8Y8;A0A494B9Y3;Q91XB7	Protein YIF1A	Yif1a	-0.228413	-0.0181649	0.118806	0.101789	-0.0683797	0.0371671	0.174852	-1.22809	-0.41234	-0.298362	-1.48157	-0.791405	-9.47624	0.304611	-9.47624	-1.19764	0.508952	0.0173545	0.527509
E9PV48		I830012O16Rik	0	0	0	0	0	0	0	0	9.2345	8.48053	9.6157	9.40492	9.49999	8.41352	8.67412	9.25562	#DIV/0!	0.000555681	0.531352
P01901;A0A494BA33;A0A494BAT0;G3UXW2	H-2 class I histocompatibility antigen, K-B alpha chain	H2-K1	0.252097	-0.0129852	0.34743	-0.873738	0.294269	0.0879575	0.258444	-0.159237	4.24235	4.28321	3.97584	4.47695	3.74356	4.23155	4.5308	3.84933	0.614311	1.06372e-05	0.543688
P26443	Glutamate dehydrogenase 1, mitochondrial	Glud1	-0.0177848	-0.0880849	0.0181362	0.0824719	-0.142601	-0.115346	0.177595	0.16273	0.29286	0.0635437	0.474915	0.355707	0.300805	0.15735	0.354092	0.139013	0.772803	0.0214439	0.549726
Q91VI7;A0A1B0GSG5;A0A1B0GRG4	Ribonuclease inhibitor	Rnh1	0.22137	-0.228193	0.124335	-0.167392	-0.0319766	0.0449358	-0.251911	0.602325	0.27633	0.419841	0.352976	0.533046	0.47389	0.180295	0.104116	0.507137	0.59989	0.0127987	0.552025
P0DOV2			-6.5411	0.0146499	-1.05883	1.32137	0.213451	-0.151775	-0.924005	-0.326342	6.21542	6.47765	6.03072	5.81577	6.39685	5.93363	5.90096	5.81655	0.790935	5.6957e-05	0.555212
P06339	H-2 class I histocompatibility antigen, D-37 alpha chain	H2-T23	1.9915	-6.99668	-6.99668	-6.99668	-0.36823	-6.99668	2.26447	-6.99668	6.09695	5.97231	5.14678	5.8696	5.31756	5.90603	6.02299	5.0968	0.801636	0.000278299	0.555688
Q9DBZ5;A0A140LJ59;Q3TY56	Eukaryotic translation initiation factor 3 subunit K	Eif3k	0.0330011	-0.228013	0.0472087	0.124047	-0.0779841	0.385212	0.00501396	0.370951	0.492588	0.233135	0.389839	0.380587	0.340451	0.210109	0.164698	0.523855	0.246742	0.00514953	0.556958
P20108	Thioredoxin-dependent peroxide reductase, mitochondrial	Prdx3	-0.14926	-0.133499	0.183946	0.071327	0.396049	0.318037	-0.123164	-0.316689	0.41445	0.196845	0.304943	0.148379	0.231636	0.371991	0.018883	0.203559	0.622809	0.0346249	0.557195
Q9D8C4	Interferon-induced 35 kDa protein homolog	Ifi35	0.329556	0.117353	-0.80501	0.119387	0.634923	-1.13205	0.304386	-1.33157	2.94699	3.40302	3.90474	3.26748	3.47523	2.75376	3.30811	3.40542	0.790554	0.000749874	0.55753
Q8CD26	Solute carrier family 35 member E1	Slc35e1	-0.269071	0.635502	-0.442525	-0.183076	-0.745006	-3.39871	-0.503293	-1.37047	-3.83172	-1.30096	-1.20335	-3.86861	-10.9974	-2.80027	-0.377136	-0.808144	0.0528302	0.012047	0.562365
Q9ET26	E3 ubiquitin-protein ligase RNF114	Rnf114	0.191318	-0.911332	0.625776	-0.35207	-1.19146	0.318665	-1.36023	-1.81558	0.884509	0.575721	1.3722	0.876654	0.920071	0.830743	0.721587	0.899872	0.236804	0.0257903	0.567233
P59279	Ras-related protein Rab-2B	Rab2b	0.217385	0.0871192	0.0252605	-0.400749	-0.273505	-1.60913	-0.831806	-1.7608	-1.33063	-0.239131	-1.46978	-1.19548	-0.198595	-0.185361	-0.175535	-10.0267	0.0163874	0.0138674	0.569215
P08551	Neurofilament light polypeptide	Nefl	-0.130562	-0.00882666	0.135592	-0.00856585	-0.121257	-0.0688595	0.124936	0.144367	-0.32245	-0.183522	-0.219703	-0.37641	-0.10853	-0.391106	-0.549818	-0.319045	0.786946	0.00922983	0.576653
O89050	Muskelin	Mkln1	0.376947	-0.297136	0.0994915	-0.293099	2.12096	-1.06956	0.817061	-0.145439	-0.0323834	1.38196	1.98149	1.79522	0.752018	0.525061	1.79079	1.36272	0.357187	0.0385733	0.583918
P35821	Tyrosine-protein phosphatase non-receptor type 1	Ptpn1	-0.245023	0.911776	-0.444214	-0.889363	1.00756	-0.394417	-0.52205	1.52165	0.983434	1.3034	0.969633	1.11381	1.50923	-1.17131	1.0494	1.01035	0.370883	0.0122645	0.585261
Q9EQG7	Ectonucleotide pyrophosphatase/phosphodiesterase family member 5	Enpp5	-0.201426	0.216737	0.180682	-0.260518	-0.00470153	-0.861323	-0.109206	-0.308627	0.329389	0.398597	0.247729	0.230923	-0.363219	0.537012	0.417101	0.0225447	0.217481	0.0440917	0.590653
P52019	Squalene monooxygenase	Sqle	-5.5337	-5.5337	0.747804	1.18751	1.20681	1.60498	-5.5337	-5.5337	3.39645	3.16737	2.86354	1.04699	2.67735	-5.5337	3.6986	0.760475	0.732123	0.0180902	0.592759
P50096;F7DEU6;E0CYE2	Inosine-5-monophosphate dehydrogenase 1;Inosine-5-monophosphate dehydrogenase	Impdh1	0.124239	0.121916	-0.145313	-0.123898	0.147636	0.203824	-0.0801427	-0.363417	-0.442111	-0.797675	-0.539982	-0.27785	-0.608166	-0.749064	-0.9361	-0.228105	0.966916	0.0069757	0.597098
P13597	Intercellular adhesion molecule 1	Icam1	-0.75828	1.24809	-8.02214	0.0421959	0.391748	-8.02214	-0.155619	-8.02214	4.42945	4.42078	4.90626	4.66706	4.53482	4.84725	4.34777	4.31641	0.487122	2.85219e-05	0.61413
P12970	60S ribosomal protein L7a	Rpl7a	-0.0358145	0.036804	-0.000679525	-0.00122499	-0.0539591	-0.205341	0.0716915	-0.142839	-0.0619358	-0.161505	-0.57248	-0.219509	-0.380804	-0.361137	-0.0235151	-0.602384	0.244545	0.0478725	0.61433
Q9JKF1	Ras GTPase-activating-like protein IQGAP1	Iqgap1	-0.017385	0.0293977	0.0610767	-0.0768158	0.244919	-0.214658	-0.0201775	-0.0542322	-0.0155218	-0.168517	-0.309289	-0.177725	-0.639959	-0.0340279	-0.231493	-0.108205	0.989164	0.0454984	0.621485
P56391;A0A140LIU3	Cytochrome c oxidase subunit 6B1	Cox6b1	-0.284563	0.0810851	-0.0932633	0.243421	0.756445	0.585248	-0.331947	-0.380459	0.666339	0.720388	0.208332	0.422865	0.467506	0.506255	-0.266577	0.73365	0.481197	0.0201882	0.623227
O35654;A8Y5G7	DNA polymerase delta subunit 2	Pold2	0.00379088	0.0103798	0.0397309	-0.055552	0.421088	-0.0589008	0.466767	0.0756181	-0.13506	-0.122677	-0.0997292	-0.182568	-0.24587	-0.354613	-0.203724	0.0510056	0.131161	0.00228441	0.625964
F7ACR9;F6Q750		Macf1	-0.287172	-0.0834986	0.282031	0.0297314	-0.046046	-0.211739	0.172406	-0.32262	-0.538834	-0.412387	-0.431762	-0.400762	-0.705656	-0.397269	-0.550558	-0.328132	0.601774	0.0201009	0.637992
Q8C4V1;D3Z5T4;G3X9N1	Rho GTPase-activating protein 24	Arhgap24	0.2269	-0.294999	0.240878	-0.263789	-0.495759	-1.24873	0.357501	-1.3254	-2.71151	-2.48633	-7.98699	-2.69624	-2.30999	-7.98699	-2.71418	-7.98699	0.242083	0.000198918	0.64009
Q61696;P17879	Heat shock 70 kDa protein 1A;Heat shock 70 kDa protein 1B	Hspa1a;Hspa1b	-0.36845	0.207237	0.0411768	0.059297	-0.00679786	-0.285925	0.608588	1.19163	0.462336	0.646696	0.62865	0.920078	-0.0778522	0.374573	0.805506	0.938892	0.275362	0.0043872	0.646132
Q9CZY3;B7ZBY7;E9PY39	Ubiquitin-conjugating enzyme E2 variant 1	Ube2v1;Gm20431	-0.0453502	0.225772	-0.0825982	-0.124711	0.424729	0.158549	-0.12697	0.0275217	0.094549	0.712133	0.486726	0.676276	0.816841	-0.127165	0.573342	0.133219	0.396013	0.0241785	0.648277
Q9CXW3;A0A0A6YY29	Calcyclin-binding protein	Cacybp	-0.1414	0.226347	-0.055994	-0.0565511	-0.0872918	0.0387423	-0.145311	0.0633119	0.487652	0.468448	0.197465	0.149632	0.224698	0.194596	0.112086	0.524406	0.769398	0.0355158	0.651299
O35942	Serine/threonine-protein kinase Nek2	Nek2	0.365697	0.283107	0.575613	-7.83715	0.906417	0.503576	-0.0318868	0.279698	3.68019	3.21515	3.29048	3.56738	3.17303	3.86158	3.16517	2.99407	0.374605	3.36193e-05	0.651439
Q6ZWZ2	Ubiquitin-conjugating enzyme E2 R2	Ube2r2	-0.125394	0.14769	-0.0566395	0.0199878	-0.713755	-0.033189	0.11568	-0.0372652	0.697665	0.362969	0.717263	0.0103288	0.432146	1.2501	-10.2924	-0.203551	0.456316	0.0476523	0.658994
Q9D1C1;A2A4Z1	Ubiquitin-conjugating enzyme E2 C	Ube2c	-0.0641178	0.0323088	0.0287534	0.000998341	0.0134726	-0.365781	0.121568	-0.822731	-0.471336	-0.877021	-0.873295	-0.671081	-0.551239	-1.13027	-1.8679	-0.32753	0.284234	0.00012442	0.659719
O08599	Syntaxin-binding protein 1	Stxbp1	-0.156423	-0.0652356	-0.0253537	0.219567	-0.387309	0.189596	-0.0473918	-0.376184	0.643834	0.476028	0.519393	0.203916	0.596567	0.340033	0.264905	0.442697	0.435561	0.00981666	0.66289
Q9ERI2	Ras-related protein Rab-27A	Rab27a	0.0225236	-0.101046	-0.00399145	0.0767938	-0.504881	-0.0882153	-0.320821	-0.0317757	-0.588732	-0.642077	-0.528893	-0.646855	-1.186	-0.321846	-0.389834	-1.12311	0.0794479	2.08718e-05	0.667238
O89053;G3UYK8	Coronin-1A;Coronin	Coro1a	-0.200142	0.059811	0.119923	0.000763184	-0.344926	-0.250661	0.548436	-0.698577	-0.42285	-1.94409	-0.243781	-0.720102	-0.592532	-0.639251	-1.00458	-1.31371	0.713727	0.0297706	0.673323
D3YZZ5;E9Q7G1		Tmed7	0.159925	0.0620289	-0.00702501	-0.245206	0.159092	-0.0670341	0.548594	0.366713	0.288228	0.323206	0.377556	0.661124	0.228467	0.352416	0.017695	0.700044	0.147701	0.0153568	0.678817
Q9CQR4	Acyl-coenzyme A thioesterase 13;Acyl-coenzyme A thioesterase 13, N-terminally processed	Acot13	-0.593479	-0.0527229	-0.00129874	0.458426	-0.852994	-0.460628	-0.282055	-0.268002	-0.864569	-0.565242	-0.921666	-1.01548	-0.992232	-0.663718	-0.89496	-1.02977	0.145183	0.027316	0.686941
G5E8R8;Q6P5G6	UBX domain-containing protein 7	Ubxn7	-6.61303	-0.309583	-6.61303	1.66571	0.912691	2.31463	0.361896	1.73394	1.89424	2.55965	2.73599	2.14676	-6.61303	0.800014	2.76021	3.10287	0.144175	0.00598907	0.689723
P97480;Q6P4T3	Eyes absent homolog 3;Eyes absent homolog	Eya3	-5.77853	-5.77853	-5.77853	1.98015	1.85444	2.20627	2.7518	-5.77853	2.8392	2.74286	3.41815	2.89807	3.28614	2.60176	2.50229	3.05098	0.159824	0.00196385	0.690393
Q8BYN3	Inositol-tetrakisphosphate 1-kinase	Itpk1	-7.94523	-7.94523	0.141042	1.53066	-7.94523	1.7866	-0.166309	-7.94523	3.35166	1.87849	2.88881	1.09205	2.30108	2.47642	2.77045	1.46739	0.937145	0.0469721	0.692509
P54987;A0A0R4J027	Cis-aconitate decarboxylase	Irg1	-0.320507	0.970407	-6.27027	0.294974	-0.048858	-0.430618	-6.27027	-6.27027	7.16852	6.49833	7.06925	6.99213	7.06897	6.77456	6.39797	7.12239	0.279061	4.35293e-05	0.694033
P17182;Q6PHC1	Alpha-enolase	Eno1	-0.116846	-0.121832	0.164135	0.054202	0.268359	0.174105	-0.122193	0.0989601	-0.296338	-0.218535	-0.380851	-0.137926	-0.24676	-0.409868	-0.420866	-0.115578	0.339534	0.0300093	0.694131
O55143	Sarcoplasmic/endoplasmic reticulum calcium ATPase 2	Atp2a2	0.0924875	-0.223752	0.0648533	0.0447142	-0.0441887	-0.143897	0.0591141	0.0771598	-0.695005	-0.562474	-1.68371	-0.484225	-2.09143	-0.245269	-0.701501	-1.48267	0.90928	0.0067848	0.694908
Q2EMV9	Poly [ADP-ribose] polymerase 14	Parp14	1.90084	-3.49707	-3.49707	-3.49707	-3.49707	2.89294	-3.49707	1.8365	8.42373	8.59044	8.84974	8.58499	8.27273	8.33635	8.7934	8.7488	0.398097	3.87331e-06	0.705765
P10711;E9PYD5	Transcription elongation factor A protein 1	Tcea1	0.0305613	-0.0362618	0.106174	-0.109293	-0.0968126	0.0604789	-0.0722242	-0.0141956	0.198104	0.384527	0.351669	0.518902	0.577117	0.273104	0.254771	0.146158	0.631289	0.00482124	0.706395
P23249;D3Z3E8;E9PW39;D3YVL0	Putative helicase MOV-10	Mov10	0	0	0	0	0	0	0	0	7.13654	7.68574	7.81523	8.26337	7.60164	7.07923	8.3162	7.18086	#DIV/0!	0.000699805	0.706755
Q811I0;H3BLL2;H3BJP9;H3BK16;V9GX21	ATP synthase mitochondrial F1 complex assembly factor 1	Atpaf1	-0.0751724	-0.138191	0.128485	0.0689708	0.0468184	-0.915567	-0.13095	-0.381081	-0.507644	-0.772166	-0.417235	-0.658534	0.134301	-0.563562	-0.0927591	-1.99501	0.155534	0.00103418	0.712265
Q9D020	Cytosolic 5-nucleotidase 3A	Nt5c3a	-0.0978638	-0.0464134	-0.0809385	0.203892	-0.303708	-0.255229	-0.266532	0.392737	0.496136	0.276114	0.702462	0.504916	0.281579	0.34205	0.210054	0.82689	0.707613	0.0056643	0.714384
E9QAA8		Gm4841	0	0	0	0	0	0	0	0	10.3945	9.97169	8.88	9.21286	9.4657	9.84959	9.46595	9.58731	#DIV/0!	0.00527899	0.721188
Q8VCT3;E9PYF1	Aminopeptidase B	Rnpep	0.00805901	-0.0126474	-0.0229498	0.0270242	-0.352218	0.186193	-0.166483	-0.312984	-0.310826	-0.638315	-0.467259	-0.136392	-0.435484	-0.627849	-0.603416	-0.133267	0.285179	0.00731919	0.7213
Q3UHG5;Q62283	Tetraspanin;Tetraspanin-7	Tspan7	-0.209681	-0.128468	0.16306	0.138565	0.387682	-0.298426	0.538148	-0.172539	-0.700147	-0.955573	-0.151724	-0.445556	-0.593355	-0.885166	-0.16682	-1.02002	0.521622	0.025913	0.727096
Q9Z1G4;K3W4T3	V-type proton ATPase 116 kDa subunit a isoform 1;V-type proton ATPase subunit a	Atp6v0a1	0.139545	-0.163335	-0.0488889	0.0549228	0.0881373	0.107152	-0.0860057	-0.115606	-0.192794	-0.360256	-0.187344	-0.11357	-0.484366	-0.136367	-0.0840106	-0.322278	0.98343	0.046778	0.727133
P42227;B7ZC18	Signal transducer and activator of transcription 3;Signal transducer and activator of transcription	Stat3	-0.365999	-0.0633025	0.386599	-0.0593599	0.0262034	-0.0229702	-0.111289	-0.124128	2.05633	2.45814	2.2791	2.32868	2.18168	2.12988	2.0389	2.54237	0.746153	1.26414e-05	0.729478
Q62523;Q7TQE2	Zyxin	Zyx	-0.16228	-0.2104	0.214031	0.113922	0.213915	-0.145796	0.453373	-0.505314	0.914256	0.24712	0.827981	0.746598	0.802954	0.471947	0.561838	0.73501	0.839245	0.00993079	0.730499
Q9EST1	Gasdermin-A	Gsdma	0.122753	-0.276268	0.251578	-0.160111	-0.18431	-0.166842	0.623651	-0.282236	0.959686	1.49391	1.02083	0.687928	0.908608	0.531448	0.72362	1.51036	0.865627	0.00640603	0.731203
Q9WV34	MAGUK p55 subfamily member 2	Mpp2	0.627097	-0.310015	-0.339915	-0.219566	-0.0989913	-0.737312	-0.268945	-0.310524	-0.785067	-1.05543	-1.14284	-1.25532	-0.890204	-1.10101	-1.86174	-0.865031	0.328197	0.0316833	0.733496
P14901	Heme oxygenase 1	Hmox1	0.132915	-0.158902	0.0377567	-0.027277	0.261338	-0.214299	0.387017	-0.0910523	0.985906	1.14891	1.04944	1.04015	0.82782	1.06777	1.1181	1.09527	0.523981	3.012e-06	0.737178
O88455;A0A140LIT2	7-dehydrocholesterol reductase	Dhcr7	-0.00737123	0.133479	0.0192552	-0.160485	-0.544128	-0.467707	0.303623	-0.27621	-0.217893	-0.413749	-0.596497	-0.393701	-1.08724	-0.0678934	-0.13961	-0.963526	0.355125	0.00592169	0.73757
Q80UG5;A2A6U3	Septin-9	2022-09-09	0.0691704	-0.108303	0.0372825	-0.00429272	0.0666593	-0.382316	-0.178008	-0.181136	0.413939	0.484626	0.366762	0.659128	0.388911	0.165653	0.339056	0.772561	0.14882	0.00115885	0.740147
Q9DBC3;A0A3Q4EHZ1	Cap-specific mRNA (nucleoside-2-O-)-methyltransferase 1	Cmtr1	0.0845551	-0.0757514	0.370177	-0.518122	0.0476888	-0.208434	0.307393	0.398522	0.377776	0.898748	0.32454	0.685235	0.306857	0.398935	0.55731	0.804928	0.504609	0.0366967	0.743015
Q9Z2X8;A0A1L1SS10	Kelch-like ECH-associated protein 1	Keap1	0.343261	0.220685	-6.383	0.636089	0.535	0.399374	1.60781	-6.383	2.04204	0.753195	1.57442	1.98198	1.66584	1.36731	-6.383	2.40547	0.542734	0.0156376	0.744528
Q9D4V0;A0A0N4SV10;A0A0N4SVC4	Ethanolamine kinase 1	Etnk1	0.146564	-0.359737	0.01902	0.138149	0.119056	-2.10371	-0.00918453	-0.535683	-1.64847	-1.74895	-0.380342	-0.418871	-10.3743	-0.596764	-0.248271	-1.63842	0.273432	0.0212918	0.746465
Q9D6R2;A0A1L1STE6	Isocitrate dehydrogenase [NAD] subunit alpha, mitochondrial	Idh3a	0.0580992	-0.0226401	-0.00993949	-0.0271705	0.0717668	0.060043	-0.1012	0.223622	0.218799	0.202338	0.102048	0.268679	0.351203	0.134258	0.175715	0.00912341	0.371442	0.00297278	0.749526
A0A140LIJ4;A0A571BGC3			-4.19792	0.680861	0.111856	0.335482	0.726041	0.462089	0.634299	0.594482	1.23312	2.59864	2.12588	1.76274	1.45637	2.192	2.16461	1.6694	0.172601	0.0119847	0.755829
O35114	Lysosome membrane protein 2	Scarb2	-0.219998	-0.112209	-0.221196	0.441918	0.255898	-0.207633	0.319696	-0.223051	0.598304	0.949795	0.461756	0.6876	0.539227	0.182484	1.05664	0.56146	0.804701	0.0112544	0.76358
Q80X90	Filamin-B	Flnb	-0.118052	0.108949	0.0613202	-0.0638519	-0.033839	0.0463563	0.0448965	-0.0231711	0.269345	0.166454	0.312594	0.211294	0.14432	0.203032	0.167077	0.365173	0.878961	0.00684876	0.770136
Q3UYV9	Nuclear cap-binding protein subunit 1	Ncbp1	-0.0526928	-0.0696899	-0.256127	0.316944	-0.268302	-0.0305144	-0.294119	-0.389692	-0.867836	-0.780252	-0.629212	-0.120845	-0.330151	-1.25618	-0.760985	-0.411272	0.17089	0.035906	0.780455
B1AXP6	Mitochondrial import receptor subunit TOM5 homolog	Tomm5	-0.0940591	-0.020712	-0.413967	0.407966	-1.0303	-0.533266	0.585201	-1.98188	-1.22009	-2.5345	-0.863096	-1.12736	-0.777331	-2.99134	-0.115942	-2.24544	0.402998	0.00616026	0.780553
Q9ESZ8;Q3UHU8;G3UYD0	General transcription factor II-I	Gtf2i	0.0639926	-0.0989639	0.0604879	-0.0319113	-0.202121	-0.12746	-0.00758938	-0.111087	-0.472409	-0.422345	-0.0306523	-1.07543	-0.32378	-0.333344	-0.991085	-0.542809	0.0966886	0.0445793	0.790068
P15116;D3YYT0	Cadherin-2	Cdh2	-0.139419	0.0495468	0.00490931	0.0755553	0.175508	0.334151	-0.0227482	0.259539	0.168149	0.231855	0.1023	0.326298	-0.320148	-0.236176	0.337015	0.602778	0.0787744	0.0209207	0.79269
P63011	Ras-related protein Rab-3A	Rab3a	-0.254404	0.188078	0.0577491	-0.0268203	0.0644301	-0.0269374	0.245724	0.0234765	-0.39968	-0.0951718	-0.389846	-0.362439	-0.589017	-0.157909	-0.173691	-0.499964	0.486005	0.0456167	0.793856
Q3UKR0;O35613	Death domain-associated protein 6	Daxx	0	0	0	0	0	0	0	0	7.43818	8.5377	8.72778	7.50611	8.53976	0	7.33662	8.90946	#DIV/0!	0.00434484	0.796168
Q62443	Neuronal pentraxin-1	Nptx1	0.642959	-1.45865	-0.0401087	0.140199	-0.919932	-0.482246	-0.549845	-0.863522	-10.8516	-3.55259	-4.55169	-1.98972	-10.8516	-0.911307	-10.8516	-10.8516	0.18051	0.011668	0.798896
P61804	Dolichyl-diphosphooligosaccharide--protein glycosyltransferase subunit DAD1	Dad1	-0.259893	-0.228896	0.12265	0.290223	-0.192273	-0.206441	0.310136	-0.403863	-0.321379	-12.7169	-1.60151	-0.439531	-12.7169	-0.401595	-0.320356	-12.7169	0.658707	0.0438731	0.800606
Q8BTV1;A0A7N9VR83	Tumor suppressor candidate 3	Tusc3	0.261419	0.0575496	-0.634648	0.159046	-0.19332	-0.661094	-0.366809	-0.566372	-0.425018	-0.541269	-2.34283	-0.829568	-2.79552	-0.80022	-0.0948113	-1.66083	0.100476	0.0406753	0.80292
P18572;K3W4Q8;J3QP71	Basigin	Bsg	0.304342	0.0235613	-0.180304	-0.207292	0.20266	0.77944	-0.044384	0.259289	-0.542423	-0.67074	-1.62043	-0.351137	-1.60248	-0.482984	-0.560063	-0.826688	0.204472	0.0234831	0.803458
Q9QY24;A2APF7	Z-DNA-binding protein 1	Zbp1	0.180152	-0.0310572	0.0851306	-0.273151	1.25061	1.1424	-9.74554	0.587322	5.472	5.36319	5.53325	5.34751	5.39068	5.42039	5.57804	5.2277	0.374965	6.76871e-08	0.806903
Q8BYN5;E0CXZ1;J3QM95;F8WGT4	FSD1-like protein	Fsd1l	0.0346311	0.0468318	-0.0013677	-0.0836628	0.412158	-0.314079	0.132657	-0.471786	0.307717	0.254197	0.0895775	0.0550623	-0.25737	0.172056	0.217527	0.375361	0.935571	0.0438998	0.807784
G3UZP7;P01899;P01897	H-2 class I histocompatibility antigen, D-B alpha chain;H-2 class I histocompatibility antigen, L-D alpha chain	H2-D1;H2-L	0.0197812	-0.221609	-0.125751	0.27746	0.0653386	0.641897	0.174274	0.229983	5.04615	4.95342	4.46518	5.00429	3.934	5.19802	5.13524	4.68016	0.151351	2.85872e-05	0.815041
Q91VK1	Basic leucine zipper and W2 domain-containing protein 2	Bzw2	-0.0455096	-0.119406	0.310794	-0.200754	-0.126051	0.162861	-0.486083	-0.340658	0.0703114	0.503179	0.549786	0.521433	0.13216	0.388709	0.673533	0.29457	0.378806	0.0370333	0.816097
P18581;E9QJY0	Cationic amino acid transporter 2	Slc7a2	0.0809274	-0.244657	0.078319	0.0600455	0.0380837	-0.221879	-0.193884	0.0181714	-1.34456	-1.72924	-1.79119	-1.63044	-1.06883	-2.65735	-1.5961	-1.28206	0.436244	2.25344e-05	0.817875
P35505	Fumarylacetoacetase	Fah	-5.60715	1.97763	-5.60715	-5.60715	-5.60715	-5.60715	0.902742	-5.60715	2.31491	1.53448	2.05106	2.20962	3.83239	2.47936	-5.60715	-5.60715	0.649883	0.0263869	0.820156
Q9D6U8	Protein FAM162A	Fam162a	-0.0053023	-0.511598	0.360401	0.0263619	0.102633	0.339332	-0.47677	0.242414	-0.521613	-1.19094	-1.18001	-0.370715	-1.61739	-0.979168	-0.79088	-0.299645	0.734696	0.0310625	0.820826
Q6ZQ08;A0A1D5RMJ8;B7ZWL1;A0A1D5RMD8	CCR4-NOT transcription complex subunit 1	Cnot1	-0.093179	0.199385	-0.203914	0.0650828	0.13801	-0.0902754	0.346273	-0.065956	0.305051	0.285015	0.397061	0.138578	0.280287	0.0577715	0.202882	0.471594	0.52524	0.0284439	0.824721
Q9Z1M2;A0A140LIF8		Irgm2	-0.816132	-6.96211	1.77231	-6.96211	-6.96211	-6.96211	2.99174	2.36862	6.81503	6.67921	6.37752	6.6341	6.2887	6.6582	6.44257	6.91956	0.326335	3.83983e-06	0.824797
Q9D0F9;A2CEK3	Phosphoglucomutase-1	Pgm1;Pgm2	-0.199029	0.0701094	0.154747	-0.0501428	0.44655	0.00546954	-0.301944	0.021262	-0.567535	-0.492733	-0.585488	-0.321925	-0.807903	-0.577161	-0.550274	-0.207456	0.716108	0.00324032	0.830373
Q80VI1;A0A0R4J0Q6	E3 ubiquitin-protein ligase TRIM56	Trim56	-0.480568	1.14137	0.0913575	-6.37807	1.98742	1.3518	1.59043	2.05759	2.08725	2.80676	1.21052	2.6656	0.483421	2.56123	0.371285	3.22451	0.00668629	0.0138965	0.831931
O89001	Carboxypeptidase D	Cpd	0.256911	-0.169512	0.0173128	-0.145818	0.150974	-0.0132792	-0.0274519	0.346378	-0.204624	-0.639265	-0.574577	-0.506265	-0.823841	-0.118524	-0.620263	-0.582388	0.400543	0.018263	0.833021
P30999;E9Q8Z8;E9Q8Z6;G3X9V2;E9Q8Z9;E9Q8Z5;E9Q904;E9Q901;D3Z2H2;E9Q8Z4;E9Q903;E9Q986;E9Q905;E9Q907;D3Z7H6;E9Q906;D3Z2H7	Catenin delta-1	Ctnnd1	-0.063741	-0.0347441	0.162125	-0.0769173	-0.0777395	-0.184276	0.177932	-0.173121	0.162898	0.105779	0.329764	0.154601	0.00989677	0.231019	-0.396501	0.577924	0.606717	0.0460378	0.841592
Q99KC8	von Willebrand factor A domain-containing protein 5A	Vwa5a	-0.7489	0.218855	0.510838	-0.292906	-0.19516	-0.820714	-0.0541083	0.252462	2.56375	3.2749	3.27707	2.85484	3.04749	2.95357	2.61626	3.23561	0.667437	0.000299922	0.843871
Q8R0P4;D3YX09;Q8CF11;D3Z1Q3;D3Z442;D3YZD8	Mth938 domain-containing protein	Aamdc	0.571869	-1.44354	0.022413	0.176617	-2.35408	0.916077	-0.0073175	0.202004	-2.02239	-1.1454	-1.70565	-1.35682	-2.04546	-2.65439	-11.0545	0.291613	0.896093	0.0337908	0.844309
Q3UDK1	TRAF-type zinc finger domain-containing protein 1	Trafd1	0	0	0	0	0	0	0	0	11.4939	11.5044	11.4883	11.1747	11.9028	10.7007	11.1393	11.471	#DIV/0!	1.3604e-06	0.848314
Q8VCD6	Receptor expression-enhancing protein 2	Reep2	-0.380397	0.317884	0.0497542	-0.0737206	-0.325124	-1.63936	-0.460768	-0.0455356	-0.345493	-0.872228	-0.704658	-1.32162	-2.40335	-0.926229	-0.446704	-0.369445	0.130888	0.0177416	0.849089
Q9DCD0	6-phosphogluconate dehydrogenase, decarboxylating	Pgd	-0.241942	-0.0836144	0.0646723	0.220152	-0.037226	0.000345384	0.0880605	-0.0229299	0.247494	0.431015	0.546822	0.329315	0.415204	0.173445	0.300522	0.568902	0.941196	0.0135063	0.849238
Q9Z1Q9;G3UY93	Valine--tRNA ligase	Vars	-0.0294164	-0.3069	0.191142	0.0977984	0.104384	0.182038	0.310381	0.3132	0.689924	0.533701	0.654249	0.804482	0.720439	0.273637	0.725964	0.817166	0.0820144	0.00075351	0.849547
Q9DBK7		Uba7	-0.937018	-0.171603	-1.12926	1.09267	-1.47189	-0.751125	-1.54796	-1.89724	2.37742	2.31086	2.15359	2.24773	2.29288	1.96206	1.85609	2.94133	0.174794	9.69674e-05	0.85032
O35955	Proteasome subunit beta type-10	Psmb10	1.99125	-6.9545	-6.9545	-6.9545	-6.9545	-0.13563	-6.9545	2.96755	7.26476	7.48897	8.32807	7.63273	7.81525	7.45294	7.24992	8.06695	0.598261	0.00124771	0.863846
P62889;A0A2I3BQF4	60S ribosomal protein L30	Rpl30	-0.0179381	-0.115411	0.19714	-0.0849548	0.345423	-0.0727985	0.481174	0.160974	0.366496	0.256012	0.122978	0.317343	0.157839	0.306486	0.152823	0.388234	0.141912	0.0218028	0.866072
Q3UED7		Gm4951	-9.27583	-9.27583	1.15703	0.821135	-9.27583	1.15887	1.08014	-1.4646	1.20766	1.76837	1.80512	1.47894	1.61919	1.15264	1.93069	1.36683	0.836205	0.0213972	0.866111
P58801	Receptor-interacting serine/threonine-protein kinase 2	Ripk2	-3.94879	-3.94879	-3.94879	1.92817	-3.94879	1.84971	-3.94879	-3.94879	7.63363	8.13923	7.7071	7.80741	7.35971	7.58898	8.02194	8.10001	0.970068	1.83825e-05	0.868043
Q9CXE2;Q921K9;D3YYL1;A0A0J9YV82	B-cell CLL/lymphoma 7 protein family member A;B-cell CLL/lymphoma 7 protein family member B	Bcl7a;Bcl7b	0.531544	-0.309711	-0.26325	-0.128924	-0.841621	-2.06122	-0.627893	-2.54405	-0.667156	-1.70774	-1.68753	-1.84009	-2.07209	-1.65813	-0.564639	-2.30602	0.0203067	0.0113243	0.871076
P70444	BH3-interacting domain death agonist;BH3-interacting domain death agonist p15;BH3-interacting domain death agonist p13;BH3-interacting domain death agonist p11	Bid	0	0	0	0	7.35403	0	0	0	11.4729	10.1693	11.7271	11.6169	11.669	9.36917	10.2181	12.1989	0.355918	0.00201391	0.872149
P04441	H-2 class II histocompatibility antigen gamma chain	Cd74	0	0	0	0	0	0	0	0	14.363	14.1121	13.8271	14.6602	13.4715	14.4842	14.4878	14.2582	#DIV/0!	0.000183604	0.877299
Q9QZ25	Vascular non-inflammatory molecule 3	Vnn3	0.376088	-5.12005	-5.12005	1.40309	-5.12005	-5.12005	-5.12005	-5.12005	4.76919	4.38121	4.56996	4.25537	5.03859	4.35118	3.75166	4.41913	0.1709	2.63381e-05	0.87805
Q8CBC4	Consortin	Cnst	0.113013	0.212497	-0.661245	0.173116	-1.52827	-0.708015	0.345885	-1.20354	-1.53962	-0.464388	-2.02576	-1.19279	-8.81897	0.384969	-0.899405	-3.22264	0.218186	0.0129952	0.87887
E9Q509;G3X925;P53657	Pyruvate kinase;Pyruvate kinase PKLR	Pklr	-0.180754	-0.135551	0.345965	-0.0947484	0.0791998	0.0670352	0.106811	1.71848	0.681775	0.414503	0.366997	0.302897	0.568026	0.162574	0.255549	0.660582	0.316096	0.0247558	0.884329
A0A0G2JDV3;L7N1X8;Q000W5		Gbp6;Gbp10	-4.82297	1.50836	-3.8809	0.0730238	-3.62765	-2.47728	-0.988592	-1.22044	4.49415	4.70472	5.054	4.95026	5.01425	4.71904	4.5368	4.86062	0.332856	3.49783e-05	0.887071
Q8BYL4;E9PX65	Tyrosine--tRNA ligase, mitochondrial;Tyrosine--tRNA ligase	Yars2	0.292991	-0.209969	0.182965	-0.367636	0.103329	0.093606	0.327819	0.388079	0.168176	0.656041	0.808689	1.18327	0.292385	1.03838	0.51114	0.878841	0.204482	0.0398573	0.887396
Q8BL03	Mitochondrial basic amino acids transporter	Slc25a29	-0.0107138	-0.123463	0.0884839	0.0372629	-0.263749	-0.647391	-0.202297	-1.50712	-1.41512	-0.941387	-1.34322	-1.40522	-0.600457	-0.336004	-1.64074	-9.42181	0.0370185	1.5947e-05	0.88789
Q9Z0H3	SWI/SNF-related matrix-associated actin-dependent regulator of chromatin subfamily B member 1	Smarcb1	0.142711	0.091544	-0.295141	0.022218	-0.26169	-0.371305	-0.761112	-0.939159	-0.399794	-0.539988	-0.310788	-0.941134	-0.108723	-0.539696	-1.26394	-0.294829	0.0170495	0.0140528	0.888231
P03975	IgE-binding protein	Iap	0.0896431	-0.063641	-0.0880609	0.0541684	0.0240386	-0.0237712	0.181231	-0.033385	-1.40756	-1.20695	-1.91501	-1.4053	-2.23992	-0.783431	-0.932604	-2.33877	0.577211	9.31309e-06	0.890644
P56695;Q3UN10	Wolframin	Wfs1	0.105661	0.0895214	0.084256	-0.322191	-0.0433294	0.705269	0.128626	0.386852	-0.472861	-0.400482	-0.525202	-0.487229	-1.70274	-0.412779	0.741802	-1.56846	0.166913	0.00643645	0.891458
Q8K2D3	Enhancer of mRNA-decapping protein 3	Edc3	0.100489	0.0532236	0.304955	-0.610649	-0.57034	-0.248263	-0.247111	1.3048	-1.19028	-0.494926	-0.618807	-1.06094	-0.660658	-0.878616	-2.12023	-0.327801	0.654821	0.0213798	0.894674
Q8K0C4	Lanosterol 14-alpha demethylase	Cyp51a1	-0.793957	-0.350902	0.279365	0.511454	0.202131	-0.124903	0.216575	0.158928	-2.51153	-1.31853	-2.83113	-2.52123	-11.4898	-0.526659	-1.80068	-11.4898	0.684183	0.00871238	0.900803
P29594;D6RFN6	Caspase-2;Caspase-2 subunit p18;Caspase-2 subunit p13;Caspase-2 subunit p12;Caspase	Casp2	0	0	0	0	7.32922	0	6.51739	7.40049	6.85258	8.29919	7.54541	6.82769	6.9356	0	8.03174	8.6172	0.036256	0.00850407	0.908015
Q3U1J0;A2ALH6	Sodium-coupled neutral amino acid transporter 5	Slc38a5	-0.786013	0.614444	-0.0480482	-0.117407	5.69231e-05	-0.949566	-0.326386	-0.102253	-1.61764	-2.23532	-2.19996	-2.10888	-10.7346	-2.53125	-0.888604	-1.59636	0.432807	0.00908559	0.908224
Q9Z0R9	Fatty acid desaturase 2	Fads2	0.0508099	-0.257551	0.203142	-0.0343913	0.0260152	-0.108149	0.0220278	-0.132713	-0.890918	-0.955381	-1.62506	-1.23107	-2.26831	-0.516	-0.539014	-1.87881	0.672686	0.00052994	0.915962
Q3UIR3	E3 ubiquitin-protein ligase DTX3L	Dtx3l	1.35734	-0.541059	-0.418825	-8.60366	-0.311738	-0.931009	-0.888192	-0.574061	5.12697	4.93183	4.82051	4.8915	4.89844	4.79416	4.84401	5.17306	0.533153	1.23286e-06	0.916405
Q9D7S9	Charged multivesicular body protein 5	Chmp5	0.0391384	0.457496	-0.111016	-0.570447	0.223275	0.278288	0.590063	0.281024	0.495822	0.402435	0.463098	0.524378	0.48299	0.488057	0.313279	0.567107	0.145207	0.0389515	0.91668
Q8JZX4	Splicing factor 45	Rbm17	-0.016419	-0.020827	0.0867599	-0.0533944	0.0178065	0.22082	0.213332	-0.0639243	0.393429	0.152112	0.472918	0.184676	0.655125	0.290228	0.0599907	0.0694927	0.243364	0.0153283	0.919441
P63005	Platelet-activating factor acetylhydrolase IB subunit alpha	Pafah1b1	0.00131878	-0.0599446	-0.136134	0.176106	0.182787	0.05728	-0.257004	-0.24917	-0.243187	-0.244274	-0.144043	-0.256504	-0.0157628	-0.385922	-0.587409	-0.0320591	0.69233	0.0287325	0.922258
P21958;Q3TBA3;F6QHF1	Antigen peptide transporter 1	Tap1	-12.8549	0.672162	0.396575	0.124364	-0.202618	-0.0886792	-5.86652	-12.8549	1.46991	1.37564	1.35271	1.27159	1.55749	1.45612	1.90239	0.177869	0.257694	0.00436675	0.922569
P52946	Pancreas/duodenum homeobox protein 1	Pdx1	-0.285781	0.168859	0.14444	-0.0736482	-0.192217	-0.297608	0.228957	-0.275126	-0.325011	-0.232208	-0.431843	-0.718442	-0.0994322	-0.688747	-0.819189	-0.115759	0.50617	0.0301326	0.922593
Q91Z53;D6REG4;B1AXQ0	Glyoxylate reductase/hydroxypyruvate reductase	Grhpr	-0.0691871	-0.103519	-0.157899	0.286569	0.0856808	-0.100004	-0.30795	-0.0252538	-0.497179	-0.519257	-0.316979	-0.443241	-1.57257	-0.151387	-0.0968854	-0.273965	0.576693	0.0146677	0.926848
Q8C7D2	Protein cereblon	Crbn	0.790488	-1.44252	-0.197403	0.0430619	-1.21909	-0.301897	0.244128	-0.259528	-8.8542	-1.45825	-1.0473	-8.8542	-8.8542	-8.8542	-8.8542	-0.0833	0.585311	0.0429248	0.92948
Q64282	Interferon-induced protein with tetratricopeptide repeats 1	Ifit1	-8.54267	1.16958	0.803369	-8.54267	-1.50395	-2.04965	-1.97424	-0.342144	6.22064	6.60555	6.0118	6.24456	6.53735	6.20883	6.1103	6.19728	0.362176	3.17076e-05	0.934408
F2Z461	E3 ISG15--protein ligase Herc6	Herc6	-4.51977	0.490701	-4.51977	1.32636	1.24255	-4.51977	-4.51977	2.12887	7.02369	7.26993	7.22214	7.07541	7.37674	7.30047	6.74803	7.0487	0.578073	3.11867e-07	0.935025
Q8JZN5	Acyl-CoA dehydrogenase family member 9, mitochondrial	Acad9	0.155392	-0.17703	-0.0779602	0.0763644	0.703064	0.204326	0.00353471	-0.112186	0.49624	0.481126	0.239943	0.569732	-0.185753	0.400193	0.793823	0.678637	0.326924	0.00446377	0.941076
Q9R1P4;A0A1B0GS70	Proteasome subunit alpha type-1	Psma1	0.122435	-0.0531403	-0.0138486	-0.0631887	0.00226527	0.0383959	-0.0222503	-0.174135	0.076726	0.321756	0.199317	0.255162	0.217986	0.155655	-0.012471	0.490953	0.582594	0.0197604	0.944909
Q8VD31	Tapasin-related protein	Tapbpl	0.796102	-1.46479	0.219436	-0.440205	-1.38836	-0.860541	0.504321	0.697965	3.72487	3.28964	3.0997	3.97375	2.57763	4.18475	3.76232	3.11324	0.988094	0.000611614	0.9451
Q9JM62	Receptor expression-enhancing protein 6	Reep6	-0.272983	0.0918754	-0.222565	0.321465	-0.322889	-0.522207	-0.815834	0.113848	-0.790272	-1.00445	-0.789929	-0.356765	-0.396468	-0.587866	-1.20742	-0.85288	0.197238	0.014829	0.95012
Q08122;E0CXS2;E0CY14;F8WIE2;E0CXS9;J3KMT7;F6TS96;Q3TY99;E0CXU1	Transducin-like enhancer protein 3	Tle3	0.0812319	-0.0486198	0.0462231	-0.0851906	0.921313	0.252809	0.359741	0.669678	-0.277236	-0.226769	-0.42405	-0.251602	0.407775	-0.629368	-0.91267	-0.309854	0.0231398	0.00235284	0.950381
Q8K1N4	Spermatogenesis-associated serine-rich protein 2	Spats2	-0.164476	0.014613	0.207273	-0.0845735	-0.039401	-0.120405	-0.0623895	-0.160402	-0.719772	-0.232434	-0.127363	-0.557821	-0.201636	-0.37051	-0.789299	-0.30675	0.32669	0.0418696	0.953878
Q64337;D3YZJ1	Sequestosome-1	Sqstm1	-0.103359	0.0563704	0.216596	-0.205395	0.0416571	-0.33618	0.374145	-0.0425806	1.20043	1.28401	1.3015	1.17713	1.14685	1.29991	1.18019	1.32005	0.863026	2.96353e-06	0.955446
Q62293;Q3T9E4		Tgtp1	1.44661	-7.7076	-7.7076	0.338861	-0.270656	-7.7076	1.13615	0.244656	9.59131	9.51742	9.59923	9.75031	9.60413	9.32035	9.67223	9.84901	0.947668	1.12665e-07	0.956802
Q9JJ78	Lymphokine-activated killer T-cell-originated protein kinase	Pbk	0.333335	-0.212863	-0.370015	0.14206	-0.394492	-0.892324	-0.466878	-0.131323	-0.999107	-0.706398	-1.1498	-1.03708	-1.07819	-1.07941	-0.96895	-0.773962	0.0966391	0.00580592	0.962272
Q5HZI2	C2 calcium-dependent domain-containing protein 4C	C2cd4cC2CD4 family	1.35298	0.521394	-7.60526	-7.60526	1.50545	1.31594	1.47903	1.92793	1.72394	2.09572	1.67527	1.68058	1.26941	0.273179	2.44926	2.3501	0.0270325	0.00988801	0.963784
Q8R5H1	Ubiquitin carboxyl-terminal hydrolase 15	Usp15	0.00957109	0.103573	-0.0393024	-0.0804128	-0.176842	-0.0591821	0.186259	-0.33977	0.377698	0.20489	0.543072	0.236621	0.161298	0.0144212	0.374021	0.709847	0.496699	0.0109712	0.966065
Q6P5E4	UDP-glucose:glycoprotein glucosyltransferase 1	Uggt1	-0.0509506	0.00214555	0.0662402	-0.0200082	0.0868819	0.0945479	-0.017175	-0.000695713	0.326794	0.335503	0.41989	0.549306	0.279157	0.46015	0.772452	0.064634	0.318053	0.000689876	0.966802
Q60715	Prolyl 4-hydroxylase subunit alpha-1	P4ha1	-0.120795	0.115985	0.0201165	-0.0253781	0.479178	0.160626	-0.225022	0.172744	-0.340426	-0.322001	-0.237439	-0.0361781	-0.689404	0.0139061	-0.350997	-0.0234495	0.32401	0.0361393	0.970566
Q9Z0V8;D3Z1Z0	Mitochondrial import inner membrane translocase subunit Tim17-A	Timm17a	0	0	0	0	10.2233	0	12.024	0	10.3106	11.1531	0	10.3075	11.9112	9.67843	0	0	0.221731	0.0417419	0.97339
Q9D8T2;A0A2R8VKQ7	Gasdermin-D	Gsdmdc1	-0.922645	0.370296	0.62233	-0.642771	-1.6286	-8.51319	-8.51319	-8.51319	3.27773	3.08029	3.09095	3.17037	3.13852	3.34891	2.97232	3.15334	0.0122429	7.70044e-07	0.979265
A0A3B2WBC6			0.480741	-1.1604	-0.0844791	0.279801	0.593228	-0.931685	1.02467	-0.450964	0.745926	0.467403	0.604864	0.798006	0.952472	0.333147	-0.782732	1.37161	0.64028	0.0396103	0.980582
P46471;Q8BVQ9	26S protease regulatory subunit 7	Psmc2	-0.0241754	-0.00230646	0.146184	-0.133565	-0.068824	0.11473	0.297674	-0.106124	0.303611	0.279368	0.459983	0.196118	0.568017	0.233831	0.259291	0.167473	0.565198	0.00843568	0.980915
Q8CBB9;D6RJ49	Radical S-adenosyl methionine domain-containing protein 2	Rsad2	0	0	0	0	0	8.68614	0	0	13.0398	13.2961	12.3728	12.3717	12.7272	13.3187	12.9898	12.0056	0.355918	0.000857749	0.982295
Q9JLQ0;A0A3B2W812	CD2-associated protein	Cd2ap	0.186809	-0.129611	0.00134633	-0.0789517	-0.513574	-0.109797	0.15721	0.235314	0.849529	0.417947	0.734482	0.833504	0.741625	1.11548	0.303848	0.580309	0.870307	0.00158677	0.986849
Q3TJ22;J3QN89		Aamp	-0.448362	0.538562	-0.0148969	-0.277754	-0.670709	-0.401632	1.78228	-8.51608	0.560055	1.27297	0.907273	1.12437	1.73939	1.51	-0.354685	-0.103551	0.7994	0.0088464	0.986971
E9PZJ8	Activating signal cointegrator 1 complex subunit 3	Ascc3	0.102495	-0.0509249	-0.214018	0.136089	0.921635	-0.445496	0.329331	-0.27375	0.40085	0.382366	0.539039	0.598474	0.502756	-0.16682	0.986073	0.394036	0.534031	0.00178372	0.990279
Q9ERS5;F8WIK5	Pleckstrin homology domain-containing family A member 2	Plekha2	0	0	0	0	7.83091	0	0	6.98395	8.95853	8.26349	8.84629	8.2935	0	8.48623	9.32071	9.16107	0.15964	0.000203316	0.990839
Q91YS4;D3YXZ3;O88448	Kinesin light chain 2	Klc2	0.122734	-0.041748	-0.099081	0.0087724	-0.0751155	-0.228082	0.24119	-0.338766	-0.199634	-0.277813	-0.113541	-0.183778	-0.407148	-0.834908	0.0592448	0.187141	0.564321	0.0182909	0.992627
B2RQG2		Phf3	-4.05229	-0.124757	0.319959	0.827227	0.571251	2.19041	0.796612	2.97833	1.40966	1.86996	1.99651	0.966516	2.39027	1.0322	1.1961	1.41747	0.106468	0.0127145	0.998608
P13808;A0A0R4J1K4;A0A0R4J1K9;A0A0R4J101;P16283;F6Q7T0;D3Z5A2;F8WHM3	Anion exchange protein 2;Anion exchange protein 3	Slc4a2;Slc4a3	0.2762	-0.518318	-0.241842	0.316318	-5.92312	-5.92312	-0.762313	-5.92312	-5.92312	-5.92312	-5.92312	-5.92312	-5.92312	-5.92312	-5.92312	-5.92312	0.00529413	0.000344228	#DIV/0!
P62700;A0A3B2W458	Protein yippee-like 5	Ypel5	0.479587	-0.400263	-0.210443	-0.0237637	-9.6663	-9.6663	0.87589	-9.6663	-9.6663	-9.6663	-9.6663	-9.6663	-9.6663	-9.6663	-9.6663	-9.6663	0.302574	0.000371886	#DIV/0!
Q99JY4;E9Q7A5;E9Q8R5	TraB domain-containing protein	Trabd	0.0708566	-0.255245	0.475624	-0.471338	-7.31638	-7.31638	-0.475403	-7.31638	-7.31638	-7.31638	-7.31638	-7.31638	-7.31638	-7.31638	-7.31638	-7.31638	0.0123624	0.00050981	#DIV/0!
Q61387;E9PZS8	Cytochrome c oxidase subunit 7A-related protein, mitochondrial	Cox7a2l	0.573571	-0.110662	-0.273459	-0.399157	0.117894	-0.29465	-0.517058	-0.49504	-11.0997	-11.0997	-11.0997	-11.0997	-11.0997	-11.0997	-11.0997	-11.0997	0.395993	0.000956926	#DIV/0!
Q5EBP8		Hnrnpa1	0.457936	-7.90666	0.316466	0.461508	0.36725	-7.90666	1.19083	-7.90666	-7.90666	-7.90666	-7.90666	-7.90666	-7.90666	-7.90666	-7.90666	-7.90666	0.876464	0.0244054	#DIV/0!
P58022	Lysyl oxidase homolog 2	Loxl2	-6.3095	0.312062	0.727213	0.124954	1.10876	-6.3095	0.320486	0.656598	-6.3095	-6.3095	-6.3095	-6.3095	-6.3095	-6.3095	-6.3095	-6.3095	0.679227	0.0303493	#DIV/0!
P25785;Q6PI17;B1AQJ3	Metalloproteinase inhibitor 2	Timp2	-0.595518	1.10598	-0.720996	-0.788212	1.5	-0.298857	0.572143	1.60111	-8.341	-8.341	-8.341	-8.341	-8.341	-8.341	-8.341	-8.341	0.164905	0.0410728	#DIV/0!
Q924A4	Urocortin-3	Ucn3	0.670655	0.702894	-8.15501	-0.364143	0.4073	0.47708	0.496939	-8.15501	-8.15501	-8.15501	-8.15501	-8.15501	-8.15501	-8.15501	-8.15501	-8.15501	0.950845	0.0416448	#DIV/0!
O88196;A0A338P6W3;G5E8T2	E3 ubiquitin-protein ligase TTC3	Ttc3	-5.37943	0.27958	-0.187224	0.913677	-5.37943	-0.578241	-0.820856	-5.37943	-5.37943	-5.37943	-5.37943	-5.37943	-5.37943	-5.37943	-5.37943	-5.37943	0.15999	0.0450432	#DIV/0!

## Sheet: Table S7
Table 6: PARP12-mediated ADP-ribosylated RNA
		NoCT1- Non target siRNA			NoCT1- PARP12 siRNA			CT1- Non target siRNA			NoCT1- Non target siRNA			ttest
GeneName	GeneID	Replicate1	Replicate2	Replicate3	Replicate1	Replicate2	Replicate3	Replicate1	Replicate2	Replicate3	Replicate1	Replicate2	Replicate3	TtestCT-NTvsCT-siPARP12	ttest-NoCT-NTvsNoCT-siPARP12
Hadhb	231086	22.0261	31.8314	46.6909	8.24605	16.6819	9.80332	24.5527	17.772	38.1564	3.27913	9.742	2.93055	0.0174954	0.0247769
Tpp2	22019	73.0339	49.2326	63.9463	23.0889	26.5747	16.3389	32.4366	30.7171	46.9617	18.0352	25.6834	23.4444	0.0460008	0.00487199
Mob4	19070	23.1854	41.1687	54.8111	13.7434	18.4277	8.16943	29.2831	46.2951	293.511	100.833	11.0705	8.79166	0.304758	0.036183
Jagn1	67767	9.85378	17.4012	15.2253	7.69632	8.53492	6.53554	25.9042	24.3543	27.8835	10.6572	12.3989	2.93055	0.0503672	0.0331186
Rps7	20115	18.5483	16.9768	15.2253	8.79579	11.6385	4.90166	19.3719	20.8437	70.4426	13.9363	3.98536	43.9583	0.369359	0.0449299
Nkapd1	270156	25.5039	28.0117	20.3004	8.79579	15.1301	9.80332	36.0407	30.2783	48.4293	1.63957	11.0705	134.805	0.469736	0.0137376
Gramd2b	107022	44.0522	40.3198	61.9162	18.1413	23.0831	32.6777	57.2146	35.7635	165.834	16.3957	41.1821	5.86111	0.109477	0.0319941
Jak1	16451	50.4282	39.0466	64.9613	29.6858	24.053	27.7761	44.1498	36.6411	240.679	2.45935	43.3962	2.93055	0.0980497	0.0176187
Rnf19b	75234	16.2297	14.4303	19.2854	12.0942	9.31083	8.16943	22.5254	17.772	24.9484	15.5759	15.9415	5.86111	0.135988	0.0205815
Mtf1	17764	32.4595	34.8024	38.5708	23.6387	21.1433	19.6066	28.382	23.0378	130.612	40.9892	8.85636	2.93055	0.194998	0.00253884
Farsb	23874	28.4021	35.6512	41.6158	25.2879	26.3807	21.2405	40.9963	31.3753	41.0915	21.3144	59.3376	17.5833	0.498282	0.0482868
Commd1	17846	60.2819	73.0001	131.953	24.1884	32.9758	24.5083	56.5388	42.3457	319.927	24.5935	20.8125	73.2638	0.248207	0.0116408
Gtf2a1	83602	48.1096	78.0931	41.6158	22.5392	31.0361	16.3389	51.5832	33.7888	105.664	18.0352	24.355	26.375	0.0589752	0.0303982
Ubr3	68795	79.9895	52.2036	44.6609	25.2879	24.053	35.9455	45.9519	30.7171	151.158	63.9431	23.0265	2.93055	0.273439	0.029377
Ptprn2	19276	272.428	207.541	190.824	88.5076	113.282	147.05	136.955	86.6661	830.636	72.9607	167.385	55.6805	0.308833	0.0217619
Sec63	140740	47.53	71.3024	70.0364	25.2879	26.7686	47.3827	34.0134	32.4724	168.769	8.19784	21.6981	11.7222	0.0706131	0.0499553
Gadl1	73748	94.4803	148.547	179.659	56.0732	83.2155	75.1588	144.163	139.543	76.3128	49.187	95.6487	55.6805	0.112462	0.0427736
B4galt6	56386	39.4151	27.1628	31.4656	17.0418	21.7253	17.9727	45.9519	38.177	10.2729	6.55827	16.8271	8.79166	0.149921	0.0145148
Usp37	319651	63.7597	53.0524	50.751	33.5339	37.6313	39.2133	35.5902	30.2783	58.7022	15.5759	34.9826	64.4722	0.690086	0.00786962
Ccnt1	12455	162.297	224.942	286.236	78.6124	132.097	98.0332	146.641	108.607	255.354	49.187	73.9506	571.458	0.793363	0.0252632
Setdb1	84505	22.0261	23.3431	25.3755	9.34553	9.5048	9.80332	13.9658	10.0928	23.4809	22.9539	7.97073	5.86111	0.478471	3.16353e-05
Dusp23	68440	5.79634	9.76164	26.3905	3.29842	3.10361	3.26777	5.4061	3.94934	32.2862	4.9187	2.21409	8.79166	0.439186	0.0466207
2600014E21Rik	102635707	55.0652	45.4129	81.2016	21.4397	34.7216	31.0438	37.6175	32.4724	38.1564	8.19784	22.5837	87.9166	0.63767	0.0321011
Fubp1	51886	42.8929	105.256	111.652	34.0837	26.7686	26.1422	60.8187	56.1684	39.624	55.7453	25.6834	8.79166	0.224379	0.0338947
Snd1	56463	208.668	196.506	215.184	94.5547	102.031	174.826	119.385	87.5437	149.691	124.607	112.476	73.2638	0.566595	0.0476029
Gopc	94221	46.9503	28.4361	33.4957	17.5916	18.2337	16.3389	19.8224	19.3079	19.0782	6.55827	27.4547	14.6528	0.458981	0.00911044
Cntnap2	66797	897.273	791.117	1594.6	360.627	409.87	550.62	576.651	550.055	402.11	294.302	623.488	550.944	0.779304	0.0245142
Arfgef3	215821	59.1227	47.1105	65.9763	24.7382	34.9156	39.2133	37.6175	33.35	8.80533	14.7561	45.6103	5.86111	0.672538	0.0296033
Cdc73	214498	59.1227	48.3838	127.893	28.0366	30.8421	22.8744	55.8631	39.0546	8.80533	24.5935	38.0824	2.93055	0.541655	0.0346493
Ctcf	13018	41.7336	48.3838	33.4957	12.6439	21.1433	26.1422	25.2285	18.8691	2.93511	12.2968	19.0412	5.86111	0.994064	0.0347142
Dap3	65111	34.778	49.2326	31.4656	21.9895	21.3373	24.5083	27.7063	23.9155	1.46755	4.09892	10.1848	11.7222	0.831976	0.0222645
Maob	109731	42.8929	51.7791	291.311	14.8429	19.7855	11.4372	20.4981	16.675	73.3777	4.9187	28.3404	2.93055	0.172855	0.0496026
Pappa2	23850	135.634	187.593	166.463	53.8742	83.6035	106.203	66.2248	52.8773	13.208	17.2155	38.5252	35.1666	0.706831	0.029872
Atg5	11793	44.0522	56.8722	32.4806	19.7905	15.1301	11.4372	25.2285	19.3079	1.46755	3.27913	11.9561	8.79166	0.817574	0.00956399
Rap1gap2	380711	140.271	67.4827	161.388	30.7853	42.4806	52.2844	51.8085	28.3036	5.87022	18.0352	36.3111	11.7222	0.960695	0.0291622
Cfb	14962	4.63707	5.51745	2.03004	0.549737	4.65541	3.26777	56.0883	50.4638	41.0915	30.332	32.7685	23.4444	0.0170957	0.450944
Nfu1	56748	10.4334	20.3721	2.03004	6.59684	12.8024	3.26777	28.6073	27.6454	248.017	4.9187	7.52791	2.93055	0.0321422	0.859671
Banf1	23825	13.9112	16.5523	2.03004	4.94763	12.2205	3.26777	31.0851	25.2319	85.1182	4.09892	8.85636	2.93055	0.0125371	0.730535
Elob	67673	24.9243	68.3315	18.2704	9.89526	71.9649	16.3389	93.7058	116.067	145.288	37.71	38.968	64.4722	0.0120019	0.670951
Eif5a	276770	8.69451	47.535	21.3154	7.14658	37.2433	14.705	50.2317	60.9954	133.547	9.8374	25.6834	2.93055	0.0389173	0.71309
Oaz1-ps	100041965	9.27414	21.6454	4.06008	6.59684	21.3373	3.26777	34.4639	40.5904	26.416	11.477	7.97073	5.86111	0.00363984	0.806837
Rpl6	19988	9.27414	35.6512	13.1953	12.0942	27.5445	13.0711	38.068	41.0293	101.261	7.37805	14.613	17.5833	0.022928	0.998993
Gm15946	108168333	8.11487	10.6105	1.01502	7.69632	5.62529	1.63389	9.46068	12.7257	32.2862	1.63957	2.21409	5.86111	0.0312525	0.939982
Tagln2	21346	9.85378	42.8663	35.5257	4.3979	21.5313	21.2405	31.7609	30.2783	349.278	3.27913	5.75664	5.86111	0.032216	0.393365
Mt2	17750	34.1984	169.768	156.313	46.1779	138.693	35.9455	257.691	275.796	299.381	90.1762	71.7365	126.014	0.00301737	0.529977
Gm6467	624037	2.31854	8.9128	3.04506	2.74868	5.04336	3.26777	11.2627	8.55691	13.208	4.9187	4.42818	5.86111	0.00707465	0.819219
Psmb2	26445	19.1279	58.5699	41.6158	21.9895	39.377	31.0438	83.1188	95.6618	90.9884	35.2507	32.7685	14.6528	0.0116551	0.647382
Cox6a1	12861	68.3968	221.122	24.3605	52.225	155.18	44.1149	240.797	207.121	158.496	125.427	46.4959	82.0555	0.0402418	0.989971
Twf1	19230	9.85378	38.1977	23.3455	9.89526	25.4108	6.53554	33.7881	32.4724	71.9102	16.3957	10.1848	11.7222	0.0139045	0.377914
Rps26	27370	33.6188	127.75	126.878	51.6753	79.9179	44.1149	168.265	141.518	139.418	91.8158	54.0238	32.2361	0.0304659	0.487519
Gabarap	56486	30.7206	112.471	99.472	43.979	83.7974	89.8637	135.153	118.919	110.067	41.809	54.0238	46.8889	0.000595877	0.980356
Son	20658	57.9634	247.436	161.388	36.2826	92.5263	53.9182	165.787	161.484	460.812	32.7913	96.0915	35.1666	0.0326583	0.170419
S100a10	20194	20.8668	64.5117	215.184	14.8429	40.7349	21.2405	107.221	78.9868	375.694	18.855	49.1528	14.6528	0.0392959	0.230831
Nsa2	59050	5.79634	15.7035	43.6459	0.549737	9.31083	4.90166	15.9931	17.1138	115.937	3.27913	4.42818	2.93055	0.0289416	0.178514
Uqcr10	66152	52.1671	207.965	466.909	48.9266	119.101	58.8199	255.213	268.336	578.216	130.346	81.4785	29.3055	0.0347468	0.266015
Anxa4	11746	39.4151	50.0815	26.3905	25.2879	39.377	19.6066	50.6822	35.5441	83.6506	15.5759	16.8271	29.3055	0.0355992	0.302214
Chuk	12675	31.3002	56.0233	52.7811	31.8847	21.3373	16.3389	44.6003	45.4174	130.612	7.37805	23.0265	20.5139	0.0465321	0.0579539
Itgb1	16412	40.5744	79.3664	31.4656	23.0889	46.9421	42.481	50.457	44.7592	146.755	9.8374	23.4694	14.6528	0.0280371	0.498917
Hspa8	15481	51.0078	285.634	219.244	60.4711	164.491	153.585	235.841	220.944	306.719	108.211	105.391	38.0972	0.0283888	0.71425
Bex3	12070	37.0966	266.111	262.89	53.8742	152.271	83.3282	237.643	190.446	368.356	94.2751	91.2205	32.2361	0.0273876	0.570627
Prdx5	54683	19.7076	54.7501	113.682	15.3926	20.5614	6.53554	59.9176	64.5059	154.093	5.73848	8.41354	32.2361	0.0305746	0.0908784
Gpx1	14775	31.8799	206.268	324.806	53.8742	116.385	45.7488	189.889	163.678	482.825	44.2683	93.8774	93.7777	0.0445645	0.431844
Micos10	433771	38.8355	244.465	369.467	84.6595	155.568	55.5521	206.108	211.509	447.604	121.328	35.8683	43.9583	0.0275139	0.526571
Slc25a4	11739	19.7076	95.0699	119.772	21.9895	63.818	21.2405	99.1119	78.548	108.599	14.7561	48.2672	29.3055	0.0258659	0.373441
Gm15427	100041686	8.11487	66.6338	117.742	20.3403	38.6011	27.7761	75.4602	68.0164	80.7155	39.3496	27.8975	52.75	0.0263087	0.690644
Calm1	12313	160.559	897.647	716.604	231.989	457.2	277.761	754.151	685.43	587.022	363.984	283.404	105.5	0.0449642	0.508743
Gm10263	100042864	0.579634	5.51745	12.1802	1.09947	2.90963	1.63389	7.65865	4.82697	8.80533	2.45935	1.77127	2.93055	0.00993461	0.521878
Rpl18a	76808	11.5927	123.082	253.755	33.5339	73.7107	45.7488	149.344	130.548	148.223	76.2399	64.6514	114.292	0.0355959	0.706698
Eif3m	98221	9.85378	40.3198	108.607	20.89	23.665	17.9727	45.9519	38.8352	102.729	6.55827	15.4986	17.5833	0.0232113	0.494065
Cyb5r3	109754	22.0261	56.8722	12.1802	9.89526	30.2602	29.4099	22.9759	36.4217	36.6889	12.2968	17.7127	17.5833	0.0240691	0.768019
Gm30821	102632858	1813.09	12621.4	4013.39	1454.6	2907.89	2740.03	10680.4	4405.71	5233.3	1907.64	3020.02	3097.6	0.0492901	0.317904
BC031181	407819	9.85378	34.8024	93.3819	18.1413	25.6048	16.3389	47.7539	26.3289	80.7155	16.3957	10.1848	8.79166	0.0195636	0.51031
Marcks	17118	45.2114	72.1513	54.8111	36.8324	42.6746	44.1149	64.1975	37.9576	79.2479	13.9363	33.6542	8.79166	0.0465886	0.0974417
Rpl34	68436	23.765	67.4827	239.545	28.0366	50.8216	19.6066	109.924	98.2947	126.21	33.6111	38.968	52.75	0.00276002	0.293703
Cox5a	12858	65.4986	168.07	217.214	95.6542	105.135	68.6232	150.695	161.265	137.95	114.77	66.4227	73.2638	0.0266086	0.344467
Copa	12847	30.7206	95.4943	134.998	39.0313	57.8047	29.4099	61.2692	62.3118	159.963	30.332	25.6834	14.6528	0.0263762	0.289466
Nono	53610	16.8094	109.076	66.9913	17.5916	52.3734	39.2133	73.4329	62.97	52.832	13.1165	42.9534	11.7222	0.0476263	0.563318
Aff2	14266	129.258	251.256	61.9162	73.6647	140.244	120.908	129.746	124.843	179.042	59.0244	104.948	52.75	0.0395507	0.741532
Ins2	16334	18530.3	93025.5	135751	19128.6	76011.7	45547.8	86542.2	85267.6	60755.3	28330.9	24142	33376.1	0.00261404	0.595943
Ndufa2	17991	66.6579	373.489	775.475	108.298	221.908	133.979	379.779	327.795	413.85	181.172	135.502	55.6805	0.0286284	0.474906
Ide	15925	47.53	42.4419	7.10514	17.5916	22.6951	31.0438	32.2114	31.5947	24.9484	6.55827	8.41354	17.5833	0.0239807	0.943031
Uqcr11	66594	44.0522	219	246.65	53.8742	113.088	62.0877	175.473	153.805	120.339	29.5122	50.9241	87.9166	0.0330192	0.364781
Rpl34-ps1	619547	6.95561	35.6512	132.968	17.5916	23.665	9.80332	60.5934	48.4891	41.0915	18.855	18.5984	14.6528	0.00163889	0.47848
Rps6-ps4	105244208	5.79634	44.1396	81.2016	5.49737	23.0831	4.90166	36.4912	32.253	38.1564	8.19784	8.85636	2.93055	0.00772934	0.281739
Rps15	20054	37.6762	303.46	376.573	51.6753	149.167	133.979	221.875	191.324	170.236	109.031	116.018	64.4722	0.0225767	0.587382
Sart3	53890	16.2297	26.314	22.3304	9.34553	11.2506	21.2405	20.4981	15.578	13.208	8.19784	11.5133	8.79166	0.0302443	0.166177
Ndufc2	68197	46.3707	202.448	1172.35	75.8637	122.205	24.5083	268.503	229.062	663.335	51.6464	71.7365	79.1249	0.00981135	0.284753
Selenop	20363	16.2297	118.413	487.21	31.8847	58.9686	32.6777	150.245	122.868	184.912	29.5122	54.9094	11.7222	0.0202901	0.418192
Retreg3	67998	15.0705	12.3082	7.10514	7.69632	6.78914	17.9727	8.55966	5.7046	11.7404	1.63957	4.42818	2.93055	0.0367634	0.780723
Maff	17133	4.05744	10.6105	81.2016	4.94763	5.23734	8.16943	12.6142	16.675	57.2346	1.63957	0.442818	5.86111	0.0393405	0.356416
Rpl13-ps6	100040416	3.4778	27.1628	48.721	3.84816	12.6084	9.80332	22.3002	20.6243	13.208	11.477	6.19945	5.86111	0.0297665	0.437523
Ndufs4	17993	53.3263	62.3896	175.598	13.7434	33.9457	31.0438	60.5934	36.2023	127.677	0.819784	12.3989	8.79166	0.0446326	0.0592542
Calr	12317	41.7336	158.308	282.176	45.0784	92.7203	83.3282	98.6614	101.366	123.275	34.4309	60.6661	73.2638	0.0428817	0.410376
P4hb	18453	78.8302	320.861	416.158	53.8742	162.552	60.4538	167.364	169.163	192.25	92.6355	73.9506	79.1249	0.000662479	0.185687
Rpl13-ps3	668182	1.7389	13.5814	38.5708	3.29842	4.65541	3.26777	11.488	7.89868	16.1431	4.9187	4.871	2.93055	0.019475	0.351832
Gm16418	100040287	5.21671	57.721	97.4419	5.49737	27.5445	14.705	40.9963	39.9322	23.4809	6.55827	11.5133	8.79166	0.00514736	0.445217
Fkbp2	14227	1.7389	28.8605	85.2617	2.74868	15.712	22.8744	16.2183	14.9197	52.832	3.27913	7.97073	5.86111	0.0382011	0.732125
Atf4	11911	19.1279	82.7617	860.737	31.335	43.4505	19.6066	143.036	117.164	419.721	44.2683	28.3404	38.0972	0.0163144	0.311419
Fam3b	52793	40.5744	6.79071	23.3455	7.69632	8.34095	8.16943	13.0647	12.2868	10.2729	2.45935	7.08509	5.86111	0.0498487	0.189323
Slc7a14	241919	40.5744	69.6048	286.236	19.7905	49.8517	39.2133	52.259	54.852	67.5075	24.5935	34.5398	11.7222	0.0395472	0.191267
Dennd4c	329877	23.1854	67.9071	235.485	17.0418	28.9024	42.481	40.5458	26.5483	54.2995	13.1165	17.7127	14.6528	0.0136615	0.254142
Mrpl13	68537	9.85378	38.1977	301.461	7.69632	25.9927	9.80332	37.167	45.6368	20.5458	3.27913	6.19945	5.86111	0.00382359	0.271698
Mrpl14	68463	13.9112	56.8722	375.557	12.0942	33.9457	21.2405	46.4024	41.6875	22.0133	6.55827	17.7127	2.93055	0.047634	0.304859
Tbc1d19	67249	43.4725	19.0989	482.135	14.2932	20.5614	14.705	13.0647	16.2362	108.599	0.819784	2.21409	2.93055	0.0227984	0.196732
Atp1b1	11931	35.9373	92.5234	824.196	26.3874	35.1096	37.5794	57.2146	41.4681	39.624	11.477	26.1263	5.86111	0.0413467	0.194198
Pcdha2	353234	9.27414	10.1861	119.772	5.49737	6.40119	8.16943	7.20814	4.38816	5.87022	4.09892	3.54254	2.93055	0.0474651	0.221203
Pcdha3	192163	9.27414	8.48838	119.772	4.94763	4.84939	6.53554	6.53237	4.38816	5.87022	2.45935	3.54254	2.93055	0.016726	0.192929
Jade1	269424	28.4021	45.8373	1241.37	13.7434	24.2469	45.7488	37.6175	25.2319	36.6889	7.37805	7.97073	5.86111	0.000634764	0.277326
Coprs	66423	11.013	10.1861	1.01502	9.89526	7.56505	6.53554	23.877	25.0125	509.241	1.63957	2.65691	2.93055	0.0308608	0.572403
Gm4540	100043594	5.79634	25.4652	2.03004	10.9947	25.7988	9.80332	51.358	68.0164	226.003	0.819784	7.97073	2.93055	0.0114302	0.402918
Rab7	19349	16.2297	39.0466	4.06008	14.2932	29.6783	22.8744	72.0814	76.3539	243.614	10.6572	35.4254	14.6528	0.0267914	0.557723
Ccng1	12450	1.7389	8.9128	10.1502	3.29842	14.1602	4.90166	28.8325	22.3796	41.0915	4.9187	11.5133	2.93055	0.0178647	0.869658
Akirin1	68050	28.9817	24.1919	4.06008	7.69632	25.7988	16.3389	48.6549	62.5312	159.963	9.8374	11.0705	5.86111	0.00578552	0.954615
Atp5pf	11957	54.4856	178.256	4.06008	31.8847	117.355	17.9727	240.797	321.652	375.694	45.9079	32.7685	5.86111	0.0142476	0.893445
Rabac1	14470	6.37597	49.2326	5.0751	9.34553	27.5445	16.3389	40.771	38.6158	240.679	4.9187	7.97073	2.93055	0.0154878	0.701982
Nsun2	28114	5.21671	24.6163	1.01502	3.29842	10.6687	8.16943	31.0851	33.1306	33.7538	10.6572	19.484	14.6528	0.00993862	0.802523
Gps2	56310	5.79634	46.2617	11.1652	8.79579	33.3638	16.3389	39.6448	51.3414	133.547	9.8374	21.2553	2.93055	0.041281	0.838956
Gm4366	100043330	2.31854	23.3431	2.03004	7.14658	18.6217	16.3389	18.9214	23.696	39.624	3.27913	6.19945	5.86111	0.00504875	0.305556
Calm3	12315	8.11487	56.0233	8.12016	13.7434	35.1096	22.8744	44.1498	39.9322	170.236	5.73848	22.5837	2.93055	0.0431807	0.628895
Gm9892	100040220	8.11487	61.1164	1.01502	8.79579	15.518	19.6066	57.4398	38.6158	95.391	19.6748	15.0558	2.93055	0.0479324	0.668405
Psmb3	26446	20.8668	70.878	6.09012	20.89	32.3939	42.481	68.9278	63.1895	126.21	22.9539	23.4694	20.5139	0.00418337	0.62789
Tcea1	21399	22.0261	52.2036	3.04506	23.0889	19.5915	21.2405	57.4398	44.7592	98.3262	13.9363	20.3696	2.93055	0.0402928	0.709997
Sqle	20775	16.8094	55.1745	1.01502	21.9895	30.0662	11.4372	74.1087	53.3161	46.9617	31.1518	35.8683	17.5833	0.0435203	0.59913
Ireb2	64602	18.5483	68.3315	1.01502	25.8376	22.1132	26.1422	52.9348	35.5441	159.963	24.5935	15.0558	8.79166	0.0488804	0.547464
Kdm5a	214899	36.5169	41.5931	2.03004	24.1884	26.7686	11.4372	27.481	25.0125	302.316	2.45935	8.41354	5.86111	0.0499098	0.789129
Rps10-ps1	668457	7.53524	39.0466	6.09012	10.9947	18.4277	9.80332	33.5629	28.9618	58.7022	7.37805	16.3843	8.79166	0.0148593	0.958393
Top2b	21974	44.6318	42.0175	7.10514	20.89	29.4843	26.1422	38.969	37.5187	209.86	2.45935	17.2699	2.93055	0.0365718	0.922723
Trnp1	69539	13.9112	21.221	4.06008	18.1413	14.1602	9.80332	28.6073	28.7424	19.0782	9.01762	15.4986	5.86111	0.0345071	0.663277
Hnrnpk	15387	53.3263	194.384	16.2403	54.424	103.971	60.4538	135.153	120.235	284.706	42.6287	56.6807	17.5833	0.0244082	0.766729
Rbm26	74213	23.765	48.3838	2.03004	17.5916	20.1735	19.6066	45.7266	42.1263	46.9617	9.8374	25.6834	14.6528	0.0190847	0.724221
Pawr	114774	29.5613	11.8837	3.04506	28.0366	26.5747	9.80332	19.1466	18.8691	45.4942	12.2968	11.0705	8.79166	0.0468111	0.437708
Tceal8	66684	11.013	55.1745	1.01502	13.7434	28.3204	11.4372	37.167	27.2066	52.832	8.19784	16.3843	8.79166	0.0121231	0.610217
2610020C07Rik	69918	9.85378	22.0698	5.0751	7.69632	14.5482	13.0711	20.2729	24.3543	17.6107	4.9187	8.41354	11.7222	0.0234831	0.850619
Aimp1	13722	26.0835	49.657	1.01502	6.59684	15.518	21.2405	35.8154	43.4427	39.624	4.09892	16.8271	11.7222	0.0277436	0.900027
Ap3s2	11778	16.8094	16.9768	1.01502	8.24605	14.9361	9.80332	15.3173	12.9451	23.4809	3.27913	9.742	2.93055	0.0367427	0.644036
Fxr1	14359	47.53	56.0233	1.01502	16.4921	27.3506	22.8744	40.0953	25.8901	93.9235	1.63957	7.08509	2.93055	0.00958814	0.751937
Asxl2	75302	66.6579	47.9594	2.03004	17.0418	36.2734	40.8471	36.7164	35.7635	51.3644	9.01762	19.9268	2.93055	0.046541	0.71293
Qrich1	69232	53.3263	44.9884	3.04506	21.9895	24.8289	24.5083	33.1124	34.0082	33.7538	6.55827	8.41354	23.4444	0.0445602	0.838551
4932441J04Rik	319216	63.7597	186.32	1.01502	54.9737	46.7481	57.186	79.9653	44.9786	133.547	18.855	36.3111	8.79166	0.0475146	0.627934
Zfp646	233905	10.4334	30.1338	12.1802	13.7434	16.1	19.6066	11.7132	11.848	13.208	5.73848	6.64227	2.93055	0.0215848	0.910214
Prcp	72461	20.8668	17.4012	13.1953	6.59684	8.92288	4.90166	9.91119	7.89868	17.6107	9.01762	7.97073	41.0277	0.683834	0.0127444
Cd2ap	12488	62.0208	69.1803	90.3368	23.0889	33.5578	29.4099	63.2965	50.6832	27.8835	22.9539	55.7951	380.972	0.548699	0.00379064
Sema4d	20354	48.1096	24.6163	62.9313	11.5445	13.1903	22.8744	18.2456	12.9451	42.5591	11.477	32.7685	750.222	0.442152	0.0429453
Ash1l	192195	79.4098	59.4187	95.4119	30.2355	40.3469	39.2133	51.8085	42.7845	22.0133	9.01762	35.4254	169.972	0.969893	0.0107229
Fnip1	216742	73.6135	75.5466	119.772	33.5339	34.3337	60.4538	60.5934	62.3118	10.2729	23.7737	69.5224	87.9166	0.573649	0.0391248
Tnpo1	238799	62.0208	112.896	77.1415	47.8271	45.0023	53.9182	71.6309	63.4089	2.93511	25.4133	20.8125	140.667	0.660028	0.0486836
Cbfb	12400	30.141	60.2675	69.0214	8.24605	24.053	19.6066	16.2183	25.2319	1.46755	9.8374	11.9561	363.389	0.387607	0.0498443
Slc9a7	236727	42.3133	72.1513	87.2917	20.89	27.1566	32.6777	34.9144	19.9661	1.46755	5.73848	15.9415	17.5833	0.891719	0.0245137
Pclo	26875	177.368	169.343	115.712	81.3611	82.0517	94.7654	91.228	55.949	1.46755	31.1518	88.1208	2.93055	0.989164	0.0169419
Odf2	18286	39.4151	29.2849	69.0214	10.9947	17.6518	16.3389	12.1637	9.87335	1.46755	3.27913	12.3989	17.5833	0.610228	0.0209656

## Sheet: Table S8
Table7: Pathways influenced by PARP12-mediated ADP-ribosylated RNA
© 2000-2025 QIAGEN. All rights reserved.
Ingenuity Canonical Pathways	Pathway Categories	-log(p-value)	Ratio	z-score	Molecules
Respiratory electron transport	Metabolism	6.5	0.0795	-2.646	COX5A,COX6A1,NDUFA2,NDUFC2,NDUFS4,UQCR10,UQCR11
Signaling by ROBO receptors	Developmental biology	6.29	0.0407	#NUM!	ELOB,Gm4705/Rpl34-ps1,PSMB2,PSMB3,RPL18A,RPL34,RPL6,RPS15,RPS26,RPS7
Selenoamino acid metabolism	Metabolism	6.1	0.0548	-2.828	AIMP1,Gm4705/Rpl34-ps1,RPL18A,RPL34,RPL6,RPS15,RPS26,RPS7
Response of EIF2AK4 (GCN2) to amino acid deficiency	Cellular resp to stumuli	6.03	0.068	-2.646	ATF4,RPL18A,RPL34,RPL6,RPS15,RPS26,RPS7
Eukaryotic Translation Initiation	Metabolism of protein	6.01	0.0533	-2.828	EIF3M,Gm4705/Rpl34-ps1,RPL18A,RPL34,RPL6,RPS15,RPS26,RPS7
Eukaryotic Translation Elongation	Metabolism of protein	5.54	0.0574	-2.646	Gm4705/Rpl34-ps1,RPL18A,RPL34,RPL6,RPS15,RPS26,RPS7
Eukaryotic Translation Termination	Metabolism of protein	5.54	0.0574	-2.646	Gm4705/Rpl34-ps1,RPL18A,RPL34,RPL6,RPS15,RPS26,RPS7
SRP-dependent cotranslational protein targeting to membrane	Metabolism of protein	5.1	0.0493	-2.646	Gm4705/Rpl34-ps1,RPL18A,RPL34,RPL6,RPS15,RPS26,RPS7
Nonsense-Mediated Decay (NMD)	Metabolism of RNA	4.54	0.0513	-2.449	RPL18A,RPL34,RPL6,RPS15,RPS26,RPS7
Major pathway of rRNA processing in the nucleolus and cytosol	Metabolism of RNA	3.43	0.0323	-2.449	RPL18A,RPL34,RPL6,RPS15,RPS26,RPS7
Detoxification of Reactive Oxygen Species	Cellular resp to stumuli	3.07	0.0811	#NUM!	GPX1,P4HB,PRDX5
RNA Polymerase II Transcription	Transcription	3	0.0333	-2.236	CCNT1,CDC73,ELOB,GTF2A1,TCEA1
Regulation of mRNA stability by proteins that bind AU-rich elements	Metabolism of RNA	2.97	0.0449	-2	HSPA8,PSMB2,PSMB3,TNPO1
ATF6 (ATF6-alpha) activates chaperone genes	Cellular resp to stumuli	2.96	0.2	#NUM!	ATF4,CALR
Chromatin organization	Other pathways	2.72	0.0235	-2.236	ASH1L,COPRS,GPS2,JADE1,KDM5A,SETDB1
Protein methylation	Metabolism of protein	2.49	0.118	#NUM!	CALM1,HSPA8
Class I MHC mediated antigen processing and presentation	Immune system	2.49	0.0184	-2.646	CALR,CHUK,ELOB,PSMB2,PSMB3,RNF19B,TPP2
NIK-->noncanonical NF-kB signaling	Immune system	2.46	0.05	#NUM!	CHUK,PSMB2,PSMB3
Hedgehog ligand biogenesis	Signal transduction	2.36	0.0462	#NUM!	P4HB,PSMB2,PSMB3
Interleukin-12 family signaling	Immune system	2.35	0.1	#NUM!	JAK1,P4HB
Complex I biogenesis	Metabolism	2.31	0.0441	#NUM!	NDUFA2,NDUFC2,NDUFS4
TP53 Regulates Transcription of DNA Repair Genes	Transcription	2.27	0.0429	#NUM!	CCNT1,ELOB,TCEA1
Regulation of RUNX2 expression and activity	Transcription	2.24	0.0417	#NUM!	CBFB,PSMB2,PSMB3
C-type lectin receptors (CLRs)	Immune system	2.2	0.0276	-2	CALM1,CHUK,PSMB2,PSMB3
Cellular response to hypoxia	Cellular resp to stumuli	2.17	0.0395	#NUM!	ELOB,PSMB2,PSMB3
Insulin processing	Metabolism of protein	2.15	0.08	#NUM!	INS,P4HB
Complex III assembly	Metabolism	2.15	0.08	#NUM!	UQCR10,UQCR11
TP53 Regulates Metabolic Genes	Transcription	2.04	0.0353	#NUM!	COX5A,COX6A1,PRDX5
Signaling by CSF3 (G-CSF)	Immune system	2	0.0667	#NUM!	ELOB,JAK1
Signaling by the B Cell Receptor (BCR)	Immune system	1.96	0.0235	-2	CALM1,CHUK,PSMB2,PSMB3
Deubiquitination	Metabolism of protein	1.95	0.0189	-2.236	ASXL2,IDE,PSMB2,PSMB3,USP37
Cristae formation	Orgenelle biogenesis and maintenance	1.92	0.0606	#NUM!	ATP5PF,MICOS10
Transcriptional regulation by RUNX3	Transcription	1.9	0.0312	#NUM!	CBFB,PSMB2,PSMB3
Mitochondrial translation	Metabolism of protein	1.88	0.0309	#NUM!	DAP3,MRPL13,MRPL14
Mitochondrial protein degradation	Metabolism of protein	1.87	0.0306	#NUM!	ATP5PF,COX5A,NDUFA2
RHO GTPases regulate CFTR trafficking	Signal transduction	1.82	0.333	#NUM!	GOPC
MTF1 activates gene expression	Cellular resp to stumuli	1.82	0.333	#NUM!	MTF1
Interleukin-4 and Interleukin-13 signaling	Immune system	1.73	0.027	#NUM!	HSPA8,ITGB1,JAK1
Activation of gene expression by SREBF (SREBP)	Metabolism	1.72	0.0476	#NUM!	MTF1,SQLE
Fc epsilon receptor (FCERI) signaling	Immune system	1.69	0.0194	#NUM!	CALM1,CHUK,PSMB2,PSMB3
TBC/RABGAPs	Vesicle-mediated transport	1.68	0.0455	#NUM!	GABARAP,RAB7A
Signaling by Insulin receptor	Signal transduction	1.66	0.0444	#NUM!	IDE,INS
ESR-mediated signaling	Signal transduction	1.66	0.0254	#NUM!	CBFB,CCNT1,GTF2A1
Complex IV assembly	Metabolism	1.61	0.0417	#NUM!	COX5A,COX6A1
NFE2L2 regulating ER-stress associated genes	Cellular resp to stumuli	1.6	0.2	#NUM!	ATF4
TCR signaling	Immune system	1.59	0.0238	#NUM!	CHUK,PSMB2,PSMB3
Interleukin-1 family signaling	Immune system	1.56	0.0233	#NUM!	CHUK,PSMB2,PSMB3
SLC15A4:TASL-dependent IRF5 activation	Immune system	1.53	0.167	#NUM!	CHUK
Regulation of Apoptosis	Programmed cell death	1.53	0.0377	#NUM!	PSMB2,PSMB3
Response to elevated platelet cytosolic Ca2+	Hemostasis	1.53	0.0227	#NUM!	CALM1,SELENOP,TAGLN2
Somitogenesis	Developmental biology	1.5	0.0364	#NUM!	PSMB2,PSMB3
Mitotic Metaphase and Anaphase	Cell Cycle	1.5	0.0169	-2	BANF1,PSMB2,PSMB3,TNPO1
Neutrophil degranulation	Immune system	1.47	0.0126	-2.449	CYB5R3,HSPA8,NDUFC2,PRCP,PTPRN2,RAB7A
Mitochondrial Uncoupling	Metabolism	1.46	0.143	#NUM!	SLC25A4
Cytoprotection by HMOX1	Cellular resp to stumuli	1.46	0.0345	#NUM!	COX5A,COX6A1
Metabolism of polyamines	Metabolism	1.45	0.0339	#NUM!	PSMB2,PSMB3
Hedgehog 'on' state	Signal transduction	1.44	0.0208	#NUM!	CDC73,PSMB2,PSMB3
Neddylation	Metabolism of protein	1.44	0.0163	-2	COMMD1,ELOB,PSMB2,PSMB3
Transcriptional Regulation by MECP2	Transcription	1.39	0.0317	#NUM!	CALM1,GPS2
Semaphorin interactions	Developmental biology	1.38	0.0312	#NUM!	ITGB1,SEMA4D
Transcriptional regulation by RUNX1	Transcription	1.38	0.0197	#NUM!	CBFB,PSMB2,PSMB3
RAF/MAP kinase cascade	Signal transduction	1.36	0.0153	#NUM!	CALM1,JAK1,PSMB2,PSMB3
Lipophagy	Autophagy	1.35	0.111	#NUM!	HSPA8
Macroautophagy	Autophagy	1.35	0.0299	#NUM!	ATG5,GABARAP
TNFR2 non-canonical NF-kB pathway	Immune system	1.34	0.0294	#NUM!	PSMB2,PSMB3
Sensory processing of sound by inner hair cells of the cochlea	Sensory Perception	1.32	0.029	#NUM!	PCLO,TWF1
RUNX1 and FOXP3 control the development of regulatory T lymphocytes (Tregs)	Transcription	1.31	0.1	#NUM!	CBFB
Interleukin-9 signaling	Immune system	1.31	0.1	#NUM!	JAK1
Protein lipoylation	Metabolism of protein	1.31	0.1	#NUM!	NFU1

## Sheet: Table S9
Table 8: SILAC bottom-up proteome landscape whose translation was affected by PARP12
			NoCT1- Non target siRNA				NoCT1- PARP12 siRNA				CT1- Nontarget siRNA				CT1- PARP12 siRNA
T: Protein IDs	T: Protein names	T: Gene names	Replicate1	Replicate2	Replicate3	Replicate4	Replicate1	Replicate2	Replicate3	Replicate4	Replicate1	Replicate2	Replicate3	Replicate4	Replicate1	Replicate2	Replicate3	Replicate4	C: Cluster	N: -Log Student's T-test p-value NoCT-NT_NoCT-si	N: -Log Student's T-test p-value CT-NT_CT-si
Q9CXS4	Centromere protein V	Cenpv	-0.508304	0.102846	-0.213274	0.640955	1.20901	0.191112	0.9729	1.70047	-0.544777	-0.216489	-0.407775	-1.65359	-0.464707	-0.803492	1.55199	-1.55688	Cluster -174	1.35374	0.208581
Q91VA7	Isocitrate dehydrogenase [NAD] subunit, mitochondrial	Idh3b	0.528486	0.36882	-0.39128	-0.466885	1.03537	0.408399	1.67853	1.47974	0.0121577	-1.47377	-0.565158	-0.437605	-0.0287707	-2.26679	-0.203729	0.322494	Cluster -174	1.61857	0.0375808
Q922U1	U4/U6 small nuclear ribonucleoprotein Prp3	Prpf3	0.401834	0.232802	-0.0157812	-0.722601	-1.37413	-1.11483	-0.362646	-1.54873	-0.618451	0.450693	1.61056	1.4061	1.34742	-0.877641	0.871806	0.313594	Cluster -178	1.6102	0.164366
Q9CR00	26S proteasome non-ATPase regulatory subunit 9	Psmd9	-0.143216	-0.605688	0.814158	-0.178259	-1.05802	-0.899248	-1.28533	-0.449072	-0.405729	1.66825	0.960784	2.11443	0.650932	0.154955	-1.14409	-0.194858	Cluster -178	1.37369	0.92692
P10637	Microtubule-associated protein tau	Mapt	0.287624	0.534567	-0.82314	0.244387	1.36792	1.19284	1.51446	0.244532	-1.17208	-1.48161	0.103407	-0.282485	-1.64948	0.167102	0.826731	-1.07478	Cluster -174	1.30384	0.156222
O88291	DBIRD complex subunit ZNF326	Znf326	0.32489	0.101412	-0.118153	0.108848	0.547195	1.12174	0.624297	2.14442	-1.38431	-0.548673	0.397296	-0.36081	-1.28795	-2.01275	0.309627	0.03292	Cluster -174	1.42234	0.153993
Q3TDD9	Protein phosphatase 1 regulatory subunit 21	Ppp1r21	-0.187139	0.131026	1.11905	-0.0490694	1.9328	1.20916	1.09332	1.09949	-0.71788	-1.06142	-0.413452	-0.173518	-0.981446	-1.02964	-1.36096	-0.610311	Cluster -174	1.62993	0.819027
O88587	Catechol O-methyltransferase	Comt	0.439809	-0.17187	-0.183796	1.19209	1.10861	1.15254	1.06843	1.88411	-0.905319	-1.23849	-0.716386	-0.741493	-0.0852492	-0.879898	-1.07614	-0.846945	Cluster -174	1.38918	0.300212
Q8CJ40	Rootletin	Crocc	-0.0589708	-0.0569836	-0.0380373	-0.19674	-0.23711	-0.13168	-0.278351	-0.231012	0.0210339	3.64027	0.0145552	-0.45404	-0.413969	-0.962379	-0.271627	-0.344962	Cluster -178	1.47321	0.647496
Q64442	Sorbitol dehydrogenase	Sord	0.388335	0.476836	0.186329	0.699898	1.56254	0.503814	1.12102	1.01936	0.325167	-0.901673	-1.36382	-0.642421	0.42288	-0.489437	-1.54915	-1.75967	Cluster -174	1.35357	0.119452
P49442	Inositol polyphosphate 1-phosphatase	Inpp1	-0.462767	-0.439403	-0.528258	-0.167564	-0.781575	-0.460466	-0.962082	-0.768739	-0.194604	-0.0642934	0.0372509	3.36977	0.427894	0.480408	0.232125	0.282306	Cluster -176	1.40463	0.196908
P59242	Cingulin	Cgn	-0.257223	-0.251415	-0.248007	-0.243263	-0.26792	-0.265988	-0.254198	-0.261094	-0.246033	-0.260142	-0.224999	3.74957	-0.262208	-0.262031	-0.227237	-0.217815	Cluster -176	1.5666	0.447835
P32921	Tryptophan--tRNA ligase, cytoplasmic;T1-TrpRS;T2-TrpRS	Wars	-1.04345	-1.28687	-1.32206	-1.13431	-0.458992	-1.26995	-0.409515	-0.47765	0.788675	1.0141	1.04393	0.681354	0.988731	0.801058	0.996986	1.08796	Cluster -179	1.33993	0.349739
Q8BI84	Melanoma inhibitory activity protein 3	Mia3	0.890263	1.58293	1.21118	0.660189	0.352131	-0.313593	0.69224	0.589758	-0.698206	-0.282563	-0.0855605	-0.213969	-0.452822	-0.400764	-0.89133	-2.63989	Cluster -181	1.33345	0.693437
Q3UPL0	Protein transport protein Sec31A	Sec31a	0.560023	1.00814	0.636292	0.524185	-0.0639115	0.291703	0.466294	-0.0440019	-0.291187	-0.487219	-0.802708	-0.0452274	-0.0810644	0.618832	0.940754	-3.23091	Cluster -181	1.64078	0.0109521
P52503	NADH dehydrogenase [ubiquinone] iron-sulfur protein 6, mitochondrial	Ndufs6	0.493816	1.42423	1.46122	1.90924	-0.219285	0.355449	0.32661	0.174552	-1.00104	-0.678285	-0.637736	-1.40814	-1.32354	-0.96606	-0.173551	0.262524	Cluster -181	1.93051	0.418427
P70195	Proteasome subunit beta type-7	Psmb7	0.293322	0.831684	1.6693	0.693526	0.252203	-0.0755884	-0.177073	0.237	-0.638	-0.592792	-2.02407	-0.801718	-0.313497	2.04008	-0.513489	-0.880887	Cluster -181	1.40781	0.71867
Q7TMM9	Tubulin beta-2A chain;Tubulin beta-2B chain	Tubb2a;Tubb2b	-1.38777	-1.46137	-1.18323	-1.42343	0.464825	-0.407841	0.600617	-0.763012	0.501626	-0.0752066	0.418325	1.26731	0.475095	1.2365	0.203796	1.53376	Cluster -179	2.12797	0.342499
Q99LC5	Electron transfer flavoprotein subunit alpha, mitochondrial	Etfa	0.298085	1.7446	2.01242	1.12467	-0.4274	0.563393	0.44772	-0.487714	-0.0943834	-0.381591	-0.838537	-1.50873	-0.859934	-0.857421	-0.974027	0.238848	Cluster -181	1.44392	0.0795022
Q9JIK5	Nucleolar RNA helicase 2	Ddx21	-1.53353	-1.27623	-0.888295	-1.27201	-0.373938	0.33603	-1.11322	1.0779	1.51978	-0.0101588	0.158479	1.09549	-0.0305639	1.0718	1.12269	0.115792	Cluster -174	1.33555	0.0920841
Q5DTM8	E3 ubiquitin-protein ligase BRE1A	Rnf20	-1.00697	-1.14751	-0.774164	-1.01517	-0.360725	0.342633	-0.0383004	0.0957462	0.0522506	-0.17761	0.424362	1.88742	-0.509012	-0.625877	0.357803	2.49512	Cluster -176	3.01746	0.0476963
P62482	Voltage-gated potassium channel subunit beta-2	Kcnab2	-0.68346	-0.560133	-0.491128	-0.720984	0.223025	-0.078991	0.44871	-0.463063	-0.110211	-0.639967	-0.564913	-0.188264	0.09888	3.16719	1.28429	-0.720984	Cluster -179	1.70891	0.770589
Q5U458	DnaJ homolog subfamily C member 11	Dnajc11	0.325169	1.22922	1.8049	2.07498	0.255602	0.0730686	-0.972988	0.344316	-0.368798	0.214968	-0.452406	-0.890018	-1.03166	-0.933844	-1.12788	-0.54463	Cluster -181	1.56944	1.06653
Q7TPR4	Alpha-actinin-1	Actn1	0.991194	1.64778	1.14965	0.0387286	0.393004	-0.536701	-0.15623	-0.0132314	0.470301	0.776482	0.700473	-0.0415736	-0.705894	-1.13446	-1.74639	-1.83314	Cluster -181	1.43251	2.88015
Q91WD5	NADH dehydrogenase [ubiquinone] iron-sulfur protein 2, mitochondrial	Ndufs2	0.469567	1.27205	1.00166	1.58029	0.252492	-0.694212	0.232	-0.466701	-0.463002	-0.7477	-1.18214	-0.655625	1.98006	-0.983564	-1.00057	-0.594602	Cluster -181	1.99669	0.361665
P49718	DNA replication licensing factor MCM5	Mcm5	1.34951	2.26879	1.26646	0.538331	-0.0585639	0.178229	-0.453853	-0.764504	-0.806981	-0.434516	-0.733756	-0.223717	0.306927	-1.81787	0.0774254	-0.691913	Cluster -181	2.12801	0.0124514
Q9CXN7	Phenazine biosynthesis-like domain-containing protein 2	Pbld2	-0.320118	-0.168101	-0.319818	-0.590189	-0.24486	0.32417	0.164705	0.0523282	-0.334714	3.63697	-0.200114	-0.476046	-0.478593	-0.317175	-0.258074	-0.470371	Cluster -178	1.53371	0.471148
P61982	14-3-3 protein gamma;14-3-3 protein gamma, N-terminally processed	Ywhag	-2.16845	-1.75646	0.429862	-1.80831	0.134869	0.722296	0.196802	0.117466	0.386526	0.232461	0.849574	0.409388	1.2454	0.675035	0.238603	0.0949449	Cluster -179	1.42287	0.120715
Q9DCT2	NADH dehydrogenase [ubiquinone] iron-sulfur protein 3, mitochondrial	Ndufs3	0.263128	2.10838	1.11861	1.43624	-0.799862	-0.210173	0.159467	-0.285281	-0.642157	-1.10992	-0.853759	-0.412589	-0.775293	1.46464	-0.623195	-0.838228	Cluster -181	1.90036	0.436893
Q9D0A3	Arpin	Arpin	-0.444686	1.44079	2.27954	2.1351	-0.666046	-0.154978	-0.274551	-0.163072	-0.560533	-0.635194	-0.43573	-0.424094	-0.652942	-0.615446	-0.702527	-0.125631	Cluster -181	1.39884	0.0244167
Q8VDW0	ATP-dependent RNA helicase DDX39A	Ddx39a	-1.08026	-1.73405	-0.193893	-1.04925	1.18697	-0.278189	0.234632	-0.0867621	2.57432	0.693322	0.569839	-0.388421	0.378977	-0.570262	-0.292003	0.0350291	Cluster -174	1.51785	0.730045
Q91VX2	Ubiquitin-associated protein 2	Ubap2	0.0295627	1.79443	1.32499	1.03008	-0.656074	-0.495825	0.160666	-0.128851	-0.805365	-0.747473	-1.38073	1.97499	-0.325419	-0.557733	-0.419343	-0.797906	Cluster -181	1.72214	0.142818
Q99PL5	Ribosome-binding protein 1	Rrbp1	-1.32182	-1.35676	-1.51272	0.169045	0.130934	-0.140493	0.415152	0.758667	1.29545	0.766547	0.896254	0.782696	-0.792849	0.511269	1.03307	-1.63444	Cluster -174	1.59589	0.952133
Q61644	Protein kinase C and casein kinase substrate in neurons protein 1	Pacsin1	0.208571	2.25736	0.827612	1.33812	-1.47489	-0.0182	0.336505	-0.19232	-0.802124	-0.0860928	-1.9202	-0.818596	0.0757108	-0.0185078	0.0983417	0.188711	Cluster -181	1.36211	1.3946
Q8R164	Valacyclovir hydrolase	Bphl	0.577258	1.62845	1.37298	0.253983	-0.0352804	-0.968601	0.264154	-0.504051	-1.48805	-0.20676	0.199958	0.47927	-1.48805	1.59181	-0.592667	-1.0844	Cluster -181	1.62305	0.0607724
E9QAT4		Sec16a	-1.63876	-1.01608	-0.294595	-1.10207	1.15393	-0.76899	1.17642	-0.071566	0.27336	-0.0326577	-0.174122	0.469775	-0.215579	2.48123	-0.354719	0.114429	Cluster -179	1.33468	0.218569
P60122	RuvB-like 1	Ruvbl1	-0.873773	-1.29682	-1.69247	-0.642537	1.51886	-0.821852	0.237695	0.768431	0.00790235	-0.202661	0.752566	0.895345	0.43624	1.60011	0.447778	-1.13481	Cluster -179	1.53667	0.0140618
P42932	T-complex protein 1 subunit theta	Cct8	-0.383608	-1.24026	-1.30834	-1.51887	0.131385	0.827466	-0.251122	1.00037	1.20036	0.689759	-1.70645	0.917595	-0.356588	0.149952	0.953376	0.894966	Cluster -174	2.14246	0.0650223
P61759	Prefoldin subunit 3	Vbp1	0.31323	0.749376	1.02496	1.75645	-1.22083	-0.562613	0.428249	-0.171625	-0.542388	1.41263	-1.0361	1.27985	-1.14056	-0.475229	-0.840256	-0.975129	Cluster -181	1.57432	0.897299
P61027	Ras-related protein Rab-10	Rab10	1.42804	-0.150815	1.0997	1.04266	-0.585918	-0.437201	-1.05224	0.633238	1.37444	-1.60063	-0.589651	-1.37155	0.748061	-1.09236	0.35596	0.198284	Cluster -181	1.30174	0.324196
Q6PDG5	SWI/SNF complex subunit SMARCC2	Smarcc2	1.26644	1.89752	0.990483	-0.157477	-0.792937	0.216416	-1.1077	-0.0132389	0.262722	-1.03229	-1.06108	-0.983169	0.235189	-0.163108	-1.098	1.54021	Cluster -181	1.43436	0.623168
P53996	Cellular nucleic acid-binding protein	Cnbp	-0.973439	-0.250931	-0.968532	-0.598078	0.493249	0.0990789	0.108075	0.508787	0.353817	1.12049	0.304751	-0.701527	2.17665	-2.29456	0.374262	0.247915	Cluster -174	2.53068	0.0506622
Q76MZ3	Serine/threonine-protein phosphatase 2A 65 kDa regulatory subunit A alpha isoform	Ppp2r1a	0.932257	0.977823	1.01051	1.5167	1.15542	-1.19755	-0.801409	-1.10133	-0.0895941	-1.06424	-1.03827	0.336496	-1.10138	0.730887	-0.879608	0.613291	Cluster -181	1.50502	0.20231
Q61490	CD166 antigen	Alcam	0.818414	0.812865	1.7561	0.825295	-1.29366	-0.922519	-0.413314	0.544648	1.05748	-0.918746	-0.988223	-1.43912	-0.816934	0.80665	0.61923	-0.448163	Cluster -181	1.84183	0.393152
Q8BFR5	Elongation factor Tu, mitochondrial	Tufm	-1.15853	-1.06415	-0.856509	-0.660001	1.61729	0.697109	-0.738745	0.290377	1.0819	0.163229	-1.05418	1.97923	-0.972509	0.0675009	-0.0590465	0.667032	Cluster -174	1.50529	0.364943
P97822	Acidic leucine-rich nuclear phosphoprotein 32 family member E	Anp32e	-0.208265	0.941202	2.62491	1.81664	-1.00426	-1.02946	-0.341189	-0.216167	-0.381828	-0.391706	-0.28785	0.325124	-0.479757	-0.216167	-0.908529	-0.242695	Cluster -181	1.62748	0.550868
P12787	Cytochrome c oxidase subunit 5A, mitochondrial	Cox5a	0.0530666	0.964848	0.829302	0.974437	0.395639	-0.383647	-1.28017	-0.167034	1.37803	-1.06356	-0.389749	0.0892413	1.10083	-2.44828	-0.201465	0.148516	Cluster -181	1.38124	0.147861
Q8BFZ9	Erlin-2	Erlin2	0.163672	-0.730432	-1.80972	-1.61377	0.698141	0.323613	0.793224	0.295188	-0.102962	-0.688815	-0.012282	-0.369455	0.675121	0.157867	2.46749	-0.246888	Cluster -179	1.75382	0.86048
O88848	ADP-ribosylation factor-like protein 6	Arl6	2.38066	0.10112	1.64615	-0.133165	-0.652656	-0.0729893	-0.515892	-1.04291	0.324853	0.00729213	-0.20432	-0.700169	-0.681831	-0.55425	-1.25385	1.35197	Cluster -181	1.30732	0.0844962
P53811	Phosphatidylinositol transfer protein beta isoform	Pitpnb	0.487994	0.922295	1.83224	1.18706	0.0406868	-1.93782	0.428771	-1.50491	0.0411512	0.471504	0.345627	0.221607	-0.100055	-0.752436	-0.315812	-1.36789	Cluster -178	1.55366	1.65917
P56480	ATP synthase subunit beta, mitochondrial	Atp5b	1.22572	1.74041	1.39695	-0.60961	-0.60919	-0.542429	-0.729434	-0.76153	-0.800375	-0.935643	-0.69534	0.782216	0.989533	1.19097	-0.748017	-0.89423	Cluster -181	1.63089	0.342424
Q921J2	GTP-binding protein Rheb	Rheb	0.657575	2.05408	0.694511	0.01554	-0.925989	-0.246814	-0.719446	-0.693944	-0.961228	-0.575111	-0.821686	0.390875	0.542557	2.09455	-0.912152	-0.593321	Cluster -181	1.79699	0.47045
Q9QWR8	Alpha-N-acetylgalactosaminidase	Naga	-0.380452	-2.43245	-0.872948	-0.65329	1.46054	1.92678	0.176785	-0.284166	0.878699	-0.260548	0.0357419	-0.200597	0.00205006	0.910905	-0.283009	-0.0240446	Cluster -174	1.47023	0.0355624
Q9JIX0	Transcription and mRNA export factor ENY2	Eny2	1.25556	0.643462	1.04787	-0.0957798	-0.565515	-1.68232	-0.197377	0.271218	0.297986	-0.0109886	0.871828	-1.68232	-1.68232	1.08133	-0.432435	0.879813	Cluster -181	1.30485	0.0379091
P16254	Signal recognition particle 14 kDa protein;Signal recognition particle 14 kDa protein, N-terminally processed	Srp14	-0.790591	-0.548442	-1.01141	-1.14358	2.19828	0.77226	-0.656125	0.565165	0.828404	-0.236992	0.244997	-0.805372	-1.0382	-0.65469	1.0476	1.2287	Cluster -174	1.42492	0.0732326
E9Q512		Trip11	0.60253	-0.138268	2.27326	0.869416	-0.904662	-1.45312	0.141056	-0.770577	0.615288	-0.571496	0.485617	0.00825493	-1.34198	-0.610815	-0.529369	1.32487	Cluster -181	1.46795	0.279485
P62267	40S ribosomal protein S23	Rps23	-0.0764297	-1.94795	-0.106217	-1.01535	0.909999	0.0528363	0.262928	1.44896	2.29323	0.340413	-0.281232	-0.477219	-0.595442	0.101183	0.135796	-1.04551	Cluster -174	1.42826	0.549075
Q9JMA1	Ubiquitin carboxyl-terminal hydrolase 14	Usp14	-0.166313	-0.912503	-0.984304	-0.389857	0.602419	1.32565	0.193528	0.0814428	-0.120393	1.18288	-0.698351	0.78881	-2.25504	-0.543269	1.70741	0.187892	Cluster -174	1.82505	0.222274
Q8BYA0	Tubulin-specific chaperone D	Tbcd	0.685786	1.66911	0.558807	1.21755	-0.746287	-1.51279	-1.22654	-0.236035	0.80949	1.05503	-0.388713	-0.337127	-1.04058	0.559743	-1.41251	0.345072	Cluster -181	2.68522	0.494086
Q60597	2-oxoglutarate dehydrogenase, mitochondrial	Ogdh	0.336167	1.92679	0.620296	0.503125	0.272636	-1.54537	-0.878783	-1.18594	-1.21188	-0.446035	-0.479611	0.679134	1.75882	0.333988	-0.120283	-0.563056	Cluster -181	1.69396	0.518187
Q91WQ3	Tyrosine--tRNA ligase, cytoplasmic;Tyrosine--tRNA ligase, cytoplasmic, N-terminally processed	Yars	-0.50532	-0.0689932	-1.04375	-0.337488	0.372376	0.858765	0.433062	0.321414	-0.148768	-2.79066	1.59564	0.274954	-0.5507	0.476821	-0.0715142	1.18416	Cluster -176	2.20298	0.211498
P24527	Leukotriene A-4 hydrolase	Lta4h	-0.320776	-1.16625	-1.59619	-0.476162	0.322577	1.80128	0.484973	1.08432	1.08471	-0.985159	-1.4595	-0.601561	0.0211515	0.697218	0.192894	0.916471	Cluster -174	2.16606	0.794026
O54734	Dolichyl-diphosphooligosaccharide--protein glycosyltransferase 48 kDa subunit	Ddost	-0.985126	-1.12891	-0.18735	-1.25919	0.806708	0.781209	-0.554631	2.8229	0.084789	0.240359	-0.484561	-0.103566	0.624782	-0.922126	0.205859	0.0588607	Cluster -174	1.34182	0.0559689
Q9D0M1	Phosphoribosyl pyrophosphate synthase-associated protein 1	Prpsap1	0.586017	0.0613244	0.65774	0.501464	-1.04093	-0.85723	0.500484	-0.603161	-0.0252779	0.139908	-1.55739	0.0443068	-0.894705	0.900708	2.55658	-0.969831	Cluster -181	1.37279	0.344164
Q8QZY9	Splicing factor 3B subunit 4	Sf3b4	-0.992521	0.20299	-0.758995	-0.662382	0.721661	0.0702168	1.35295	0.362815	0.641334	2.2578	-0.384138	-1.04221	-0.843186	-1.55039	-0.145643	0.769691	Cluster -178	1.67674	0.410067
Q7TSH6		Scaf4	-0.445606	-0.666556	-1.03408	-0.827575	0.916916	1.88086	-0.224115	0.81673	2.00776	-0.750495	-1.56956	-0.38351	-0.268883	-0.056598	0.154062	0.450647	Cluster -174	1.91911	0.115633
Q8K4B0	Metastasis-associated protein MTA1	Mta1	-0.058615	1.77112	1.34541	0.25637	-1.19098	-1.57665	0.134818	-1.19	-0.362659	0.159981	0.601551	0.640938	1.40099	-0.690664	-1.12326	-0.118352	Cluster -178	1.67978	0.270616
P62702	40S ribosomal protein S4, X isoform	Rps4x	0.817783	1.39192	0.772709	0.9729	-1.13998	-1.16987	-1.21817	-1.22704	-1.31552	-0.971874	0.704216	0.0615651	1.01974	0.95351	0.237229	0.110895	Cluster -181	5.30414	0.938753
Q61112	45 kDa calcium-binding protein	Sdf4	-0.827188	-0.740337	-0.814091	-0.814425	1.50758	2.49654	-0.805899	0.717083	0.0749678	-0.0139894	-0.232839	-0.00615686	0.867288	-0.648426	0.410792	-1.1709	Cluster -174	1.36051	0.0684069
P34152	Focal adhesion kinase 1	Ptk2	0.62878	0.466069	0.622522	0.399941	-0.619302	-1.88261	0.00974573	-0.144205	0.185495	0.364061	-0.556199	-0.105508	-1.88261	2.40453	-0.134922	0.244217	Cluster -181	1.4744	0.0737719
Q8R127	Saccharopine dehydrogenase-like oxidoreductase	Sccpdh	-0.413703	0.544349	0.449614	0.75603	-0.190236	-0.561744	-0.3885	-0.563013	1.46405	-0.694917	-0.369734	-0.688299	2.84293	-0.688118	-0.640977	-0.857735	Cluster -181	1.50182	0.0826346
P60867	40S ribosomal protein S20	Rps20	-0.400798	-0.200323	0.264541	-2.20027	0.512734	0.922187	1.17859	0.637033	1.36733	-1.05526	0.334701	0.426436	-0.480155	-1.82101	0.366513	0.14776	Cluster -174	1.37997	0.459722
Q8R1B4	Eukaryotic translation initiation factor 3 subunit C	Eif3c	-1.71843	-0.31218	-0.313265	-1.27827	1.40724	0.315776	1.50221	1.6417	-0.626429	-0.311095	-0.596578	-0.393591	-0.454379	1.3877	-0.230226	-0.0201831	Cluster -179	2.40905	0.761491
Q505F5	Leucine-rich repeat-containing protein 47	Lrrc47	-0.317002	-0.635428	-0.905653	-1.40474	1.03488	0.369188	2.35982	0.882692	-0.467296	1.22161	0.365013	-0.301442	-0.74701	0.223448	-0.525744	-1.15235	Cluster -174	2.19579	0.777117
O35654	DNA polymerase delta subunit 2	Pold2	0.403812	0.348974	0.194658	0.649583	-0.588626	-1.02619	-0.0938249	-0.584644	0.371114	3.06393	0.475601	-1.12059	-0.998933	-0.574449	-0.391719	-0.128694	Cluster -178	2.42106	0.660964
Q9D1R9	60S ribosomal protein L34	Rpl34	-0.282914	-1.39343	-0.743141	0.360961	-0.192926	1.33168	0.616959	1.35289	0.81038	0.257527	0.866751	-0.0750119	-0.41686	-2.52696	0.359409	-0.325321	Cluster -174	1.3217	0.910992
Q8BMK4	Cytoskeleton-associated protein 4	Ckap4	0.49922	-0.0977403	0.122461	1.8335	-1.4299	-0.836055	-0.953686	-0.351754	-0.760618	-0.334706	-0.652649	1.51868	0.646968	1.79955	-0.454041	-0.549225	Cluster -181	1.64751	0.21813
P97493	Thioredoxin, mitochondrial	Txn2	0.757167	0.112117	0.72362	-0.0643078	-0.391256	-0.502988	-0.543702	-1.00332	-0.757157	-0.452987	-0.352144	1.73109	2.63827	-0.613279	-0.887184	-0.393939	Cluster -181	2.13544	0.0503476
Q9QY36	N-alpha-acetyltransferase 10	Naa10	-0.748493	-0.977278	0.0442495	-0.624071	1.61711	1.48818	-0.699806	1.49179	0.428336	0.0370366	-0.315269	0.219387	0.807239	-0.949553	-1.91157	0.0927112	Cluster -174	1.38082	0.419435
P17183	Gamma-enolase	Eno2	-0.999652	-1.32058	-0.390059	0.200674	2.42623	0.95164	0.908816	0.0640902	-0.350529	-0.368524	1.2844	0.2817	-0.227761	-0.50324	-1.32058	-0.636628	Cluster -174	1.55284	1.00626
Q9JKY5	Huntingtin-interacting protein 1-related protein	Hip1r	-0.304061	0.193228	0.130338	-2.43759	1.04015	1.58848	0.511143	1.22025	-0.150207	0.692704	0.122499	-0.518252	-0.767807	-1.44283	0.274529	-0.152577	Cluster -174	1.37144	0.579672
P61222	ATP-binding cassette sub-family E member 1	Abce1	-1.049	-0.640798	-0.626241	0.654163	1.28557	0.112835	0.469309	1.16305	0.170183	-0.271816	-1.37398	0.00781337	0.801021	-0.812247	1.80612	-1.69598	Cluster -174	1.34919	0.177141
Q8VD75	Huntingtin-interacting protein 1	Hip1	-0.281678	-0.695858	-0.9852	-0.634169	2.46488	0.529482	1.37117	0.379765	-0.228303	0.317188	-1.85094	-0.249311	0.482961	0.392903	-0.772779	-0.240108	Cluster -174	1.98089	0.367391
Q8BX70	Vacuolar protein sorting-associated protein 13C	Vps13c	0.723565	-0.554461	-0.501987	-1.17578	1.08149	0.309286	0.767272	0.704529	1.27836	-0.410566	-1.45758	1.44166	-1.32913	0.903527	-0.815664	-0.964519	Cluster -174	1.36355	0.391386
P32067	Lupus La protein homolog	Ssb	-0.956371	0.248306	-0.579561	-1.14014	1.1003	1.62561	0.130128	2.13483	-0.265863	0.528593	0.300899	-0.20399	-1.51076	-1.02258	-0.387135	-0.00228169	Cluster -174	1.9003	1.10835
Q8CCK0	Core histone macro-H2A.2	H2afy2	0.928066	-0.834249	0.766507	0.624464	-0.88838	-0.736565	-0.744577	-0.900648	-0.750065	0.226362	-0.938095	1.84768	1.84415	-0.0785015	0.64941	-1.01556	Cluster -181	1.56692	0.106529
Q6Y7W8	PERQ amino acid-rich with GYF domain-containing protein 2	Gigyf2	0.120601	-0.576038	-0.908155	0.0759223	0.322325	1.25214	0.990201	0.310437	-0.121775	-1.17738	-1.28207	-1.13116	-0.293011	0.829129	-0.740946	2.32979	Cluster -174	1.61943	1.02386
Q9CY27	Very-long-chain enoyl-CoA reductase	Tecr	0.0771181	0.2004	0.286238	0.147951	-0.905342	-0.510365	-0.303543	0.118347	-0.656087	-0.423581	0.088338	-0.54443	-0.0353498	3.49239	-0.613776	-0.418309	Cluster -179	1.42306	0.452427
Q8CG47	Structural maintenance of chromosomes protein 4	Smc4	-0.0471567	-1.3823	-0.63996	-0.126679	0.986634	1.99988	0.125966	2.08739	0.528524	-0.479393	0.231742	-0.266319	-0.449715	-1.28831	-0.644526	-0.635775	Cluster -174	1.79643	1.37815
Q80X50	Ubiquitin-associated protein 2-like	Ubap2l	-0.535794	-0.86043	0.462598	-0.693579	1.09509	1.36124	1.49114	0.466452	-0.476852	-0.778138	-1.43217	0.233856	-1.03748	-0.544863	-0.535794	1.78472	Cluster -174	2.16371	0.309373
P63037	DnaJ homolog subfamily A member 1	Dnaja1	0.660305	-0.066095	-1.16536	-0.973946	1.27024	0.666827	1.31389	1.0901	-1.13512	-0.219321	0.870456	-1.43267	-0.887016	0.386467	-1.22027	0.841519	Cluster -174	1.77542	0.1367
P24472	Glutathione S-transferase A4	Gsta4	-0.0862504	-0.299282	-0.2195	0.0584281	0.345137	0.650662	0.643553	-0.072591	-0.875055	-0.699043	-0.552107	3.27592	-0.704549	0.0114563	-0.814758	-0.662023	Cluster -176	1.51604	0.351493
Q9D6R2	Isocitrate dehydrogenase [NAD] subunit alpha, mitochondrial	Idh3a	-1.23053	0.236755	-1.59657	0.977756	0.89631	1.50024	0.816094	1.4947	0.00474269	-0.566944	-0.249798	0.0689464	0.183278	-1.76678	-0.127476	-0.640737	Cluster -174	1.32518	0.389666
Q91YR7	Pre-mRNA-processing factor 6	Prpf6	-0.0791911	-0.978292	-0.559555	0.459787	1.10876	1.08119	0.0960484	1.11614	1.35512	-1.40245	-1.19738	0.79776	-1.66237	0.841759	-0.354783	-0.622539	Cluster -174	1.53777	0.14873
Q9ERG2	Striatin-3	Strn3	-0.512142	0.0947895	0.0019648	-0.911539	0.454404	1.14498	0.921588	1.48494	-0.0221455	-1.02272	-0.768731	1.02063	-0.360988	-1.46578	-1.50718	1.44794	Cluster -174	2.23453	0.123
P46638	Ras-related protein Rab-11B;Ras-related protein Rab-11A	Rab11b;Rab11a	-0.0539181	0.360613	-1.17312	-0.630929	1.88245	1.26734	0.557315	1.1748	-0.0848665	-0.868995	0.165399	0.276695	-0.177117	0.443341	-1.22937	-1.90964	Cluster -174	1.99638	0.45242
P21279	Guanine nucleotide-binding protein G(q) subunit alpha	Gnaq	0.026794	-0.552366	0.0532282	-0.575184	1.33878	0.959124	-0.25344	1.58265	-0.214833	-0.977709	-0.80255	-1.4711	2.03254	-0.635082	-0.804944	0.294091	Cluster -174	1.41216	0.766958
Q9D6P8	Calmodulin-like protein 3	Calml3	-0.679221	0.469886	0.246928	-0.957652	1.22037	1.25806	0.704046	0.189641	0.0496433	0.0506034	-0.688999	0.843795	-1.66874	-1.42871	1.54467	-1.15433	Cluster -174	1.33271	0.402028
Q8K274	Ketosamine-3-kinase	Fn3krp	-0.323997	0.00085234	-0.177115	-0.416672	0.481327	0.453155	1.99658	0.716609	0.50503	-1.46233	0.217095	-0.737442	1.45685	-2.03591	-0.707327	0.0332985	Cluster -174	1.63237	0.0223211
O55131	Septin-7	2025-09-07	-0.512148	0.0205153	0.563543	-0.960738	0.624008	1.16243	1.16185	0.643011	0.54454	-0.694694	0.232428	-0.356669	-1.05287	-2.66296	0.684473	0.603277	Cluster -174	1.66505	0.262826
G5E8V9		Arfip1	-0.178389	-0.732797	-0.41265	0.499571	2.33828	0.999765	0.323803	0.853673	-1.44414	0.518688	-1.04752	0.818006	-0.564734	-1.41019	-0.0311551	-0.530208	Cluster -174	1.42578	0.219247
P36536	GTP-binding protein SAR1a	Sar1a	0.0415923	-0.956826	0.40847	-0.464092	1.59536	1.754	1.11919	1.03975	0.450775	-0.353723	0.248651	-0.798582	-1.20816	-1.27435	-0.382467	-1.21959	Cluster -174	2.47173	1.36075
Q9CYA0	Cysteine-rich with EGF-like domain protein 2	Creld2	0.829008	-0.00648647	-1.07558	-0.614146	1.52343	0.281113	1.26647	1.93117	-0.663263	-1.07946	-0.510968	-0.723391	-0.244939	-0.966182	-0.884696	0.937919	Cluster -174	1.45618	0.447296
Q8R1Q8	Cytoplasmic dynein 1 light intermediate chain 1	Dync1li1	0.0950953	-0.737066	0.170824	-0.104922	0.857301	1.09298	0.11598	1.28858	1.25564	-0.972061	-0.940309	-0.422777	-0.262661	-1.58621	-1.44562	1.59523	Cluster -174	1.61212	0.0607568
Q9CZW5	Mitochondrial import receptor subunit TOM70	Tomm70a	-0.628822	-0.229234	0.123292	0.267091	0.878455	0.830522	0.461655	1.22357	0.55251	0.580617	-2.95597	0.121766	-0.958688	0.414594	-0.877202	0.195845	Cluster -174	2.05138	0.0450005
Q9Z1Z2	Serine-threonine kinase receptor-associated protein	Strap	0.702588	-0.533183	-1.05852	0.162273	1.02107	1.04461	1.30567	2.05142	-0.112343	-0.956876	-0.904092	-0.400511	-0.935477	-1.49683	0.0734686	0.0367344	Cluster -174	1.82614	0.00999055
Q9ER00	Syntaxin-12	Stx12	-0.35242	-0.403414	0.0470381	0.0177309	2.01209	0.261274	1.74891	1.23252	-0.393156	-1.61908	-0.0842584	0.0397114	-0.00835263	-0.895775	-0.0449866	-1.55783	Cluster -174	1.98417	0.0761053
P61255	60S ribosomal protein L26	Rpl26	-0.790079	0.591475	-0.211875	-0.0721434	1.87931	1.63925	0.334386	1.36204	-1.33015	-0.669344	-1.10965	-0.396072	0.727548	-0.982579	-0.815548	-0.156574	Cluster -174	1.7397	0.611192
Q8BFU3	RING finger protein 214	Rnf214	-0.165283	-0.250353	0.174204	-0.109793	2.17708	1.24746	1.03285	-0.00308333	-0.9599	-1.0684	-1.108	-0.749657	0.987186	-1.60701	0.286076	0.11663	Cluster -174	1.40828	0.822484
Q6PHN9	Ras-related protein Rab-35	Rab35	-0.373418	0.464134	-0.24303	0.347499	-0.818146	-0.780266	-0.290125	-0.627231	1.7146	-0.693635	-0.75562	1.38005	-0.900716	-0.700179	-0.0705204	2.3466	Cluster -176	1.51139	0.0884052
Q9JLV5	Cullin-3	Cul3	-0.360189	2.67312	-0.847398	-1.33818	0.132969	0.873597	0.136737	1.2918	0.200984	-0.0189248	0.175998	0.0756617	-0.35662	-0.940001	-0.521799	-1.17776	Cluster -181	0.248114	2.33893
Q9D706	RNA polymerase II-associated protein 3	Rpap3	-0.65297	0.219958	-1.17404	1.93785	1.56015	-0.607306	-0.275268	1.08828	-1.7036	-0.880582	-0.415092	-0.405888	-0.276684	1.03696	0.350932	0.197302	Cluster -181	0.160588	1.55491
Q61699	Heat shock protein 105 kDa	Hsph1	0.726533	0.329813	-0.831564	0.5721	0.762076	1.56753	1.11299	-0.0103405	1.23614	-0.459873	-0.49091	0.28551	-0.720683	-1.91285	-1.57344	-0.593031	Cluster -174	0.650563	1.3847
P54103	DnaJ homolog subfamily C member 2;DnaJ homolog subfamily C member 2, N-terminally processed	Dnajc2	-0.125213	-0.15921	-0.0564896	-0.237889	-0.435558	-1.35639	-0.176937	-0.263386	2.43016	-0.158238	2.04696	0.636323	-0.224533	-0.550177	0.00543347	-1.37485	Cluster -178	0.739353	1.406
Q04447	Creatine kinase B-type	Ckb	-0.82036	1.29021	0.0995004	0.852482	0.841847	1.1604	1.20184	1.37529	-1.09608	-0.977801	-0.981322	-1.73683	-0.416952	-0.274179	-0.343854	-0.174189	Cluster -174	0.829113	2.49669
Q9DC51	Guanine nucleotide-binding protein G(k) subunit alpha	Gnai3	1.29711	-0.43013	0.412617	0.164485	0.22259	0.851207	0.740807	2.12329	0.568642	-0.361479	0.031272	-0.839236	-1.3241	-0.813842	-1.18809	-1.45516	Cluster -174	0.534461	1.71773
O35286	Pre-mRNA-splicing factor ATP-dependent RNA helicase DHX15	Dhx15	0.301431	0.692897	0.234473	-0.657925	1.19911	0.710123	-0.129765	-0.244788	-0.404542	1.58419	1.46472	-0.178108	-1.77453	-0.0528055	-1.09468	-1.64979	Cluster -174	0.214692	1.4367
Q8CAY6	Acetyl-CoA acetyltransferase, cytosolic	Acat2;Acat3	1.64017	-0.313624	0.410897	-0.755677	0.163311	-0.940934	2.59951	0.444638	-0.70575	-0.33095	-1.32923	-0.882252	-0.0728767	-0.519672	0.276845	0.315601	Cluster -181	0.133512	1.54106
Q9D7M1	Glucose-induced degradation protein 8 homolog	Gid8	0.128324	0.473062	0.16574	0.33619	0.911286	1.20294	-0.0798618	0.375205	0.209019	0.655131	1.9099	-1.22483	-1.60368	-1.24402	-1.1435	-1.0709	Cluster -174	0.506114	1.34029
P35980	60S ribosomal protein L18	Rpl18	0.0762679	-1.58651	0.916356	-1.38956	-1.4761	-0.795648	-1.05545	-0.846702	1.03804	0.828072	1.07027	0.866987	0.503717	0.565835	0.690419	0.594005	Cluster -178	0.386843	2.62654
Q80ZM5		H1fx	-0.655607	-1.14266	-1.14185	1.03158	-0.97005	-1.31561	-0.744041	-0.609023	-0.65492	0.108374	0.713969	0.734283	0.958422	1.6594	0.81065	1.21708	Cluster -179	0.344449	1.32376
P12367	cAMP-dependent protein kinase type II-alpha regulatory subunit	Prkar2a	-0.176754	0.356188	0.875219	0.309475	0.769129	1.98491	-0.196062	-0.0351619	1.13868	-0.209349	-0.198968	0.136741	-1.76792	-2.1111	-0.287203	-0.587826	Cluster -174	0.212744	1.3769
Q99LB2	Dehydrogenase/reductase SDR family member 4	Dhrs4	0.0838847	1.28651	0.228708	0.700438	0.992091	1.03983	2.08432	0.0419186	-0.419917	-0.473162	-0.377155	-0.739524	-1.38535	-1.39766	-0.699669	-0.96527	Cluster -181	0.412834	1.74672
Q8CGF7	Transcription elongation regulator 1	Tcerg1	0.585353	-0.378176	1.19192	0.344944	1.11836	0.396595	1.25466	0.229742	-0.0628589	0.275985	0.468529	0.0877684	-2.60781	-1.07155	-0.880087	-0.953372	Cluster -178	0.321914	1.98232
Q8C570	mRNA export factor	Rae1	1.20219	-0.0943482	-0.0605639	0.791265	2.81452	0.375827	0.347456	-0.619059	-0.277606	-0.011341	-0.259962	-0.494147	-0.997806	-1.47329	-0.725225	-0.517906	Cluster -174	0.126607	1.57349
Q9D6Y7	Mitochondrial peptide methionine sulfoxide reductase	Msra	-1.63657	0.338784	0.195675	-0.302455	-0.4607	0.0719755	0.227541	-1.63657	1.01768	1.06881	1.24748	1.54826	0.444812	-1.63657	-0.281452	-0.206711	Cluster -178	0.0561781	1.95464
Q80UW2	F-box only protein 2	Fbxo2	0.696913	-0.57304	2.20885	0.073445	0.688507	0.843823	0.21363	1.18648	-0.21373	-1.72587	-1.34154	-1.26896	0.029492	-0.275897	-0.315086	-0.22702	Cluster -174	0.0751417	1.51999
P70122	Ribosome maturation protein SBDS	Sbds	0.0691351	-0.448285	0.84292	0.797694	0.0669576	-0.69619	2.76335	-0.694515	-1.07264	-1.46033	-0.684549	-0.427263	-0.411685	0.218633	0.713523	0.423239	Cluster -181	0.0171957	1.88688
Q60823	RAC-beta serine/threonine-protein kinase	Akt2	0.545012	-0.946851	1.03693	0.561375	0.470062	-0.973318	0.830278	0.740224	2.10064	-0.431851	0.479788	-0.197161	-1.73712	-0.59912	-0.955983	-0.922913	Cluster -178	0.0182104	1.32375
Q9DAA6	Exosome complex component CSL4	Exosc1	-0.80847	-0.935988	1.09135	-0.87	-0.972155	-0.123795	0.0311402	-0.279465	0.5941	1.09433	2.43424	0.452452	-0.600267	-1.21337	0.747181	-0.64129	Cluster -178	0.0284527	1.3669
Q9EQP2	EH domain-containing protein 4	Ehd4	0.121302	-0.347752	-0.435242	-0.804767	-0.335612	-1.20138	0.792727	-0.367718	-1.13285	-0.684067	-0.7847	0.402634	1.26018	-0.160632	1.206	2.47189	Cluster -179	0.0701454	1.48326
Q922D4	Serine/threonine-protein phosphatase 6 regulatory subunit 3	Ppp6r3	-0.67525	0.169675	1.34618	1.28511	-0.472835	-0.616619	1.36811	1.11366	-1.82019	-0.802692	-1.05499	-0.549816	0.922711	0.616651	0.0251748	-0.854873	Cluster -181	0.0942775	1.38055
P24547	Inosine-5-monophosphate dehydrogenase 2	Impdh2	0.31908	1.06658	0.740533	0.778925	0.174967	1.60636	1.12589	-1.1083	0.0701047	0.65057	0.126547	-0.916342	-0.799733	-1.8005	-1.3802	-0.654474	Cluster -181	0.173794	1.45541
O88342	WD repeat-containing protein 1	Wdr1	-1.44142	-0.0569015	-0.805443	-1.19881	-0.835273	0.437486	-0.898116	-0.854763	1.56428	1.76871	1.41353	0.552432	0.556807	-0.218383	-0.284009	0.299869	Cluster -178	0.322626	1.98468
Q9D3D9	ATP synthase subunit delta, mitochondrial	Atp5d	1.366	1.38933	0.296261	-1.14098	-0.631477	0.298717	0.887198	0.568403	-0.38307	1.34186	0.101874	0.496787	-1.66562	-1.16512	-1.28666	-0.473511	Cluster -178	0.106798	1.88157
Q8R3G1	Nuclear inhibitor of protein phosphatase 1	Ppp1r8	-0.300403	0.417	1.45806	2.03836	0.516992	0.00738649	-0.0708735	1.42864	-0.584264	-0.249492	-0.0669667	0.0664781	-0.927948	-0.901088	-1.56807	-1.26382	Cluster -181	0.287735	2.39791
Q8BKZ9	Pyruvate dehydrogenase protein X component, mitochondrial	Pdhx	0.813906	-1.90144	-1.17633	1.20044	-1.17588	1.45948	0.0637719	-0.812734	-0.10195	0.526085	-0.739879	-0.83477	0.962538	0.18677	0.933306	0.596691	Cluster -179	0.0551618	1.4064
P54823	Probable ATP-dependent RNA helicase DDX6	Ddx6	0.0195201	1.82133	0.625369	1.53064	-0.625669	0.910152	0.877587	0.508439	-0.585454	-0.302419	0.269771	-0.208438	-0.871549	-1.52045	-1.02476	-1.42407	Cluster -181	0.481869	2.26678
Q9WTL7	Acyl-protein thioesterase 2	Lypla2	0.165138	-0.0572029	0.69743	1.96411	-0.989709	0.0075082	1.77429	-0.0240176	-0.409963	-1.02356	-1.61459	-1.09092	0.131953	-0.138507	1.09864	-0.490603	Cluster -181	0.283973	1.51615
Q9Z0N1	Eukaryotic translation initiation factor 2 subunit 3, X-linked;Eukaryotic translation initiation factor 2 subunit 3, Y-linked	Eif2s3x;Eif2s3y	1.59358	-0.670033	-1.55454	-1.21455	0.179268	0.236749	-0.461941	-0.44991	0.239868	-0.738209	-0.927586	-0.0729379	2.13319	0.492519	1.16269	0.0518283	Cluster -179	0.179103	1.34387
Q9DBJ1	Phosphoglycerate mutase 1	Pgam1	-0.798093	1.0689	1.1701	1.62989	1.2285	0.973642	-0.918821	-0.584218	-0.912476	-1.12424	-1.16933	-1.09248	-0.195894	0.235809	-0.339299	0.828008	Cluster -181	0.331534	2.38696
Q9CQ91	NADH dehydrogenase [ubiquinone] 1 alpha subcomplex subunit 3	Ndufa3	-0.629795	0.930515	1.36644	0.825263	-0.651579	1.18991	1.20199	-1.27882	-0.690531	0.59771	0.510809	0.433853	-1.93662	-0.414792	-0.675731	-0.778627	Cluster -181	0.272129	1.3724
Q8BHS3	Pre-mRNA-splicing factor RBM22	Rbm22	-0.65745	0.607669	0.0216416	1.64855	1.27938	0.100828	-1.00911	-0.121644	-1.53258	-0.433876	-1.20042	-1.29194	1.2426	0.929263	0.782343	-0.365262	Cluster -181	0.199574	2.22512
Q8CGP6	Histone H2A type 1-H;Histone H2A type 1-F;Histone H2A type 1-K	Hist1h2ah;Hist1h2af;Hist1h2ak	0.237314	1.17328	-0.00738366	0.151417	-0.175568	-0.0160454	0.256081	0.110995	1.54862	-0.091115	2.20452	-0.753025	-1.45935	-0.839403	-1.29016	-1.05017	Cluster -178	0.573491	1.43858
Q61334	B-cell receptor-associated protein 29	Bcap29	-0.724607	2.62008	1.08418	-1.15664	-0.357092	1.04297	-0.0969944	-0.430011	0.880108	-0.414834	0.734643	-0.376168	-0.893421	-0.759456	-0.676263	-0.476499	Cluster -181	0.172804	1.34689
Q9CQR4	Acyl-coenzyme A thioesterase 13;Acyl-coenzyme A thioesterase 13, N-terminally processed	Acot13	0.922365	-0.791416	-0.336134	-1.05616	0.0331376	-0.351561	-0.376222	0.584817	-0.28442	-0.505723	-0.534078	-1.65819	2.34774	1.16181	-0.318534	1.16257	Cluster -179	0.236337	1.57631
Q8BI72	CDKN2A-interacting protein	Cdkn2aip	1.02507	-0.102085	2.14201	0.0267912	0.902521	-0.93653	0.755419	-0.516425	-0.0883239	0.849148	-0.515868	0.803957	-1.51229	-0.566451	-1.16639	-1.10056	Cluster -178	0.470535	1.87
Q01768	Nucleoside diphosphate kinase B	Nme2	1.50617	-0.513782	-0.773003	-1.95391	-0.757645	0.826373	0.334069	-0.499622	1.11224	0.777132	0.686635	1.21072	0.637128	-0.870633	-0.929509	-0.792353	Cluster -178	0.2007	1.95164
Q922H9	Zinc finger protein 330	Znf330	2.38409	-0.0545224	1.12844	-0.514781	-0.457113	-0.0680148	-1.1272	1.75757	0.319125	-0.00991109	-0.591382	0.322607	-0.83816	-1.15177	-0.469299	-0.629683	Cluster -178	0.338643	1.6199
Q99P31	Hsp70-binding protein 1	Hspbp1	-0.286158	1.02103	1.79422	1.17619	-1.18699	0.283852	1.8636	-0.947509	-0.260541	0.220762	-0.276643	0.0748191	-0.790003	-0.806544	-0.646842	-1.23325	Cluster -181	0.514798	2.41763
Q9CR26	Vacuolar protein sorting-associated protein VTA1 homolog	Vta1	-0.294824	0.664865	0.211221	0.150719	-0.302418	-0.889218	0.902572	0.25856	2.11516	-0.023701	0.974213	0.628664	-0.53405	-0.297862	-2.00181	-1.56209	Cluster -178	0.171626	1.80717
Q61584	Fragile X mental retardation syndrome-related protein 1	Fxr1	0.240511	-1.06843	-1.38297	-0.10884	-1.50412	1.43043	0.1903	0.353153	-0.521153	0.0593265	-1.09791	-0.797712	1.72266	1.12491	0.937087	0.422758	Cluster -179	0.432787	2.38972
Q8CI32	BAG family molecular chaperone regulator 5	Bag5	0.0192824	-1.40177	-0.198457	-1.49694	0.679089	1.46324	0.303326	-1.31027	0.914188	1.43992	1.16309	-0.0972219	0.651374	-0.450185	-0.973721	-0.704946	Cluster -178	0.730889	1.33347
Q9CR16	Peptidyl-prolyl cis-trans isomerase D	Ppid	-1.0702	-0.544393	-2.19172	0.170823	-0.22972	1.23303	-0.128523	0.647449	1.60624	1.21327	0.661484	0.315787	-0.836961	-0.742504	0.607561	-0.711628	Cluster -174	1.11201	1.65366
Q8K0U4	Heat shock 70 kDa protein 12A	Hspa12a	-0.30037	-0.293364	-0.00957513	-0.0681108	1.88421	-0.711099	-0.243642	-0.615724	0.738807	2.59718	0.24084	0.135144	-0.822219	-0.74161	-0.642016	-1.14845	Cluster -178	0.153255	1.63891
Q8R323	Replication factor C subunit 3	Rfc3	0.275158	-2.87868	-0.301426	-0.965445	0.748048	0.105888	0.433943	0.551055	0.940687	1.42104	-0.0137114	0.819577	0.0109014	-0.669822	-0.693013	0.215803	Cluster -174	1.06001	1.52998
Q9D172	ES1 protein homolog, mitochondrial	D10Jhu81e	0.784717	1.4781	-0.505987	0.76835	0.828364	-1.29946	0.631956	-1.40784	0.215663	0.901768	0.474895	0.565825	-0.582203	-1.65716	-1.43216	0.235172	Cluster -178	0.611238	1.66224
P54822	Adenylosuccinate lyase	Adsl	-0.0513741	3.03089	1.03767	-0.807793	-0.950604	0.155208	-0.721568	-0.185952	0.168381	0.173171	0.275864	0.398765	-1.06093	-0.711089	-0.818272	0.0676349	Cluster -181	0.681586	1.91271
P70460	Vasodilator-stimulated phosphoprotein	Vasp	0.868204	-0.617816	0.505753	-0.537104	1.76873	-0.467912	-0.344281	-1.08899	-0.743261	-2.02738	-0.317535	-0.113902	0.0823139	0.336519	1.60904	1.08762	Cluster -179	0.0421323	1.53637
Q6ZWN5	40S ribosomal protein S9	Rps9	1.65655	-0.365635	1.3553	-1.53652	-0.110069	-0.22555	-0.650449	0.294118	0.568011	0.874038	1.01262	0.586338	-0.555553	-2.05632	-0.409443	-0.437435	Cluster -178	0.234619	2.1139
Q9CQC7	NADH dehydrogenase [ubiquinone] 1 beta subcomplex subunit 4	Ndufb4	1.84078	0.121661	-0.288731	0.176214	-0.545978	-0.280872	-0.647897	0.306985	0.684723	0.38202	1.09259	0.963989	-2.18869	-1.74511	0.133083	-0.00477711	Cluster -178	0.709803	1.51701
P36552	Oxygen-dependent coproporphyrinogen-III oxidase, mitochondrial	Cpox	0.133662	-0.20349	-0.821367	-0.461526	-0.259917	-0.785159	-0.414739	2.35595	1.64673	1.31781	0.561332	0.0983948	-0.490563	-0.872739	-0.553456	-1.25092	Cluster -178	0.318649	2.30237
A2A5R2	Brefeldin A-inhibited guanine nucleotide-exchange protein 2	Arfgef2	1.80993	-1.57162	-0.586014	1.63795	0.438713	-1.13953	-0.259849	0.00916068	0.900017	0.572074	0.873345	0.045994	-0.664761	-0.331483	-1.46366	-0.270264	Cluster -178	0.255112	2.03768
Q9JKV1	Proteasomal ubiquitin receptor ADRM1	Adrm1;Gm9774	1.84219	-1.21778	0.608569	-2.25004	0.0160928	-0.231352	0.198393	0.809151	-0.933774	-0.268687	-0.0889616	-0.999948	0.447898	1.05119	0.218992	0.798079	Cluster -179	0.188424	2.18145
P10639	Thioredoxin	Txn	3.40981	-1.33646	0.393484	-0.0385636	-0.583426	-0.392685	-0.581446	-0.466593	0.097652	0.078128	0.254835	0.107046	-0.100786	-0.335216	-0.390562	-0.115217	Cluster -181	0.507967	2.32121
P62715	Serine/threonine-protein phosphatase 2A catalytic subunit beta isoform	Ppp2cb	-0.836717	1.26073	0.494966	0.881229	-0.390372	-1.05431	0.332973	-0.577631	2.52692	0.868722	0.121125	-0.356993	-0.892573	-0.888348	-0.782128	-0.707596	Cluster -178	0.80366	1.35527
P62908	40S ribosomal protein S3	Rps3	-0.476096	-0.114931	1.01135	-0.704543	-0.620416	0.701679	-0.129435	0.347041	1.77575	-0.246923	1.97083	0.145427	-0.543542	-1.97725	-0.213562	-0.925376	Cluster -178	0.113362	1.43945
Q99L27	GMP reductase 2	Gmpr2	-0.405955	0.0559704	1.58451	0.314368	-1.03	-1.78716	0.0343744	0.782446	1.56618	-0.00354383	1.47477	0.367102	-0.666412	-1.06101	-0.980757	-0.244865	Cluster -178	0.588704	1.96988
P70168	Importin subunit beta-1	Kpnb1	0.537275	0.493789	0.713791	0.0640635	-2.05446	0.694024	0.815391	-2.00075	0.744034	0.667537	0.472243	0.637096	-1.57101	-0.540398	-0.102569	0.429943	Cluster -178	0.637819	1.34053
Q8K4Z3	NAD(P)H-hydrate epimerase	Apoa1bp	0.567529	-0.734512	0.409129	0.850007	-1.76069	1.8683	-0.197525	-1.66687	1.3453	0.47193	0.616092	0.240557	-0.869521	-0.57789	-0.0332755	-0.528565	Cluster -178	0.330847	2.13255
P10852	4F2 cell-surface antigen heavy chain	Slc3a2	1.30106	-1.41893	-1.50349	1.28731	0.0963092	0.557421	0.50804	-0.556237	0.787638	0.13171	0.894517	0.972759	-0.294677	-1.13776	0.02438	-1.65005	Cluster -178	0.103349	1.84159
Q3UM45	Protein phosphatase 1 regulatory subunit 7	Ppp1r7	0.449659	1.45068	-0.457086	-0.426188	-0.495511	-2.21551	0.118889	0.462335	0.0634304	0.667531	0.463919	2.09519	-1.16339	-0.642476	-0.310121	-0.061351	Cluster -178	0.478211	1.46059
Q9JLI8	Squamous cell carcinoma antigen recognized by T-cells 3	Sart3	-0.213277	-0.600125	-0.411529	0.275697	3.25036	0.351779	-0.805108	-0.465372	0.822756	0.00926327	0.446004	-0.297406	-0.787111	-1.00468	-0.425575	-0.145681	Cluster -174	0.380084	1.44275
Q9D6J6	NADH dehydrogenase [ubiquinone] flavoprotein 2, mitochondrial	Ndufv2	0.228932	0.484968	-0.225612	-0.934314	1.71431	-1.44279	-1.05068	2.09745	0.492068	0.812685	-0.354683	0.497793	0.103434	-0.800593	-0.711439	-0.911527	Cluster -178	0.17734	1.48501
Q8K310	Matrin-3	Matr3	1.49026	-0.731223	-0.220717	-1.24368	1.38317	1.15628	0.234043	-0.0740209	1.32204	0.7289	0.0736541	0.135756	-0.907259	-1.67057	-0.928286	-0.748337	Cluster -174	0.579145	2.41079
Q80T23	Synaptotagmin-like protein 5	Sytl5	0.363914	-2.10269	1.04355	0.42408	-1.71285	1.58202	1.56291	-0.387909	0.140266	0.0928611	0.482273	0.189952	-0.151993	-0.48987	-0.676963	-0.359552	Cluster -178	0.1149	2.42466
Q9CZU3	Superkiller viralicidic activity 2-like 2	Skiv2l2	0.249107	-0.550195	0.264655	0.773421	-0.857402	-2.49617	1.3086	-0.949003	0.323287	0.62731	1.59651	0.536647	0.568679	-0.616319	-0.541765	-0.237367	Cluster -178	0.518265	1.33043
Q01853	Transitional endoplasmic reticulum ATPase	Vcp	-0.369745	1.51603	-0.891865	-1.07115	-0.599021	1.23968	1.4022	1.47523	-1.01688	-0.946759	-0.628371	-0.958073	0.469597	0.638974	-0.712305	0.452454	Cluster -174	0.677655	1.84033
P58404	Striatin-4	Strn4	-0.599961	-0.501955	0.598195	0.177878	-0.295389	1.3732	2.17578	-1.48973	0.59314	0.308168	-0.155431	1.01833	-0.397297	-1.48973	-0.256098	-1.0591	Cluster -178	0.243376	1.76834
O88441	Metaxin-2	Mtx2	-0.468263	0.674149	-0.57563	-0.226238	0.978612	2.69493	0.249703	0.0462986	-0.472769	-1.3483	-1.37183	-1.13404	0.561761	0.359258	-0.0304286	0.0627769	Cluster -174	0.862953	2.72783
Q9D0I9	Arginine--tRNA ligase, cytoplasmic	Rars	-0.0530843	-0.0504179	-0.989992	1.59717	-0.581095	0.838045	-2.24513	-1.44778	1.05227	0.8416	0.947824	0.193143	-0.437537	-0.21131	0.547372	-0.00108348	Cluster -178	0.535642	1.47317
Q9CQ43		Dut	1.07338	-0.45008	-0.710089	-0.360361	-0.509625	0.605363	2.14519	1.20467	-0.816821	-0.872995	-0.927405	-1.44373	-0.827093	0.794752	0.400566	0.694279	Cluster -181	0.686349	1.72853
Q6ZQM8	UDP-glucuronosyltransferase 1-7C	Ugt1a7c	-0.759593	-0.965335	0.826459	0.59353	0.727262	-0.32239	1.67551	0.33378	0.635413	-0.307328	1.08106	0.541726	-1.6373	-1.44552	-1.40952	0.432242	Cluster -178	0.501592	1.42534
P61161	Actin-related protein 2	Actr2	-1.56162	0.872635	-0.650584	1.29739	0.82072	0.208179	1.76324	-1.05194	0.529774	0.577802	0.610562	0.0718672	-0.861603	-0.209418	-1.03359	-1.38342	Cluster -181	0.197894	2.50947
Q8BH04	Phosphoenolpyruvate carboxykinase [GTP], mitochondrial	Pck2	-1.52764	0.680882	0.896471	-0.12792	1.48371	1.68827	0.964963	-0.403496	0.347387	0.337504	-0.0601173	-0.146536	-1.06934	-1.67726	-0.521633	-0.865242	Cluster -174	0.627607	2.24043
Q91YH5	Atlastin-3	Atl3	-0.358355	0.637914	0.0546839	-0.409831	0.462059	0.714266	0.863522	2.39228	0.671411	-0.472637	-0.209592	0.0652747	-1.3662	-1.78254	-1.14995	-0.112305	Cluster -174	1.18953	1.38263

## Sheet: Table S10
Table 9: Pathway enrichment of proteins whose translation was affected by PARP12
¬© 2000-2025 QIAGEN. All rights reserved.
Ingenuity Canonical Pathways	Pathway Categories	-log(p-value)	Ratio	z-score	Molecules
Response of EIF2AK4 (GCN2) to amino acid deficiency	Cellular resp to stumuli	7.37	0.0874	NaN	EIF2S3,RPL18,RPL26,RPL34,RPS20,RPS23,RPS3,RPS4X,RPS9
SRP-dependent cotranslational protein targeting to membrane	Metabolism of protein	7.23	0.0704	NaN	DDOST,RPL18,RPL26,RPL34,RPS20,RPS23,RPS3,RPS4X,RPS9,SRP14
Major pathway of rRNA processing in the nucleolus and cytosol	Metabolism of RNA	7.11	0.0591	NaN	DDX21,EXOSC1,MTREX,RPL18,RPL26,RPL34,RPS20,RPS23,RPS3,RPS4X,RPS9
Eukaryotic Translation Initiation	Metabolism of protein	7	0.0667	NaN	EIF2S3,Eif3c,RPL18,RPL26,RPL34,RPS20,RPS23,RPS3,RPS4X,RPS9
Nonsense-Mediated Decay (NMD)	Metabolism of RNA	6.89	0.0769	NaN	PPP2R1A,RPL18,RPL26,RPL34,RPS20,RPS23,RPS3,RPS4X,RPS9
Signaling by ROBO receptors	Developmental biology	6.8	0.0488	NaN	PRKAR2A,PSMB7,PSMD9,RPL18,RPL26,RPL34,RPS20,RPS23,RPS3,RPS4X,RPS9,VASP
Respiratory electron transport	Metabolism	6.74	0.0909	NaN	COX5A,ETFA,NDUFA3,NDUFB4,NDUFS2,NDUFS3,NDUFS6,NDUFV2
Selenoamino acid metabolism	Metabolism	6.07	0.0616	NaN	RARS1,RPL18,RPL26,RPL34,RPS20,RPS23,RPS3,RPS4X,RPS9
Eukaryotic Translation Elongation	Metabolism of protein	5.66	0.0656	NaN	RPL18,RPL26,RPL34,RPS20,RPS23,RPS3,RPS4X,RPS9
Eukaryotic Translation Termination	Metabolism of protein	5.66	0.0656	NaN	RPL18,RPL26,RPL34,RPS20,RPS23,RPS3,RPS4X,RPS9
Neutrophil degranulation	Immune system	5.19	0.0294	NaN	ACTR2,CCT8,CKAP4,DDOST,DYNC1LI1,IMPDH2,KCNAB2,KPNB1,LTA4H,PGAM1,PSMB7,RAB10,SRP14,VCP
Complex I biogenesis	Metabolism	5.11	0.0882	NaN	NDUFA3,NDUFB4,NDUFS2,NDUFS3,NDUFS6,NDUFV2
Glucose metabolism	Metabolism	4.52	0.0698	NaN	ENO2,PCK2,PGAM1,PPP2CB,PPP2R1A,RAE1
Processing of Capped Intron-Containing Pre-mRNA	Metabolism of RNA	4.46	0.0347	NaN	DDX39A,DHX15,MTREX,PPP1R8,PRPF3,PRPF6,RAE1,RBM22,SF3B4,TCERG1
Protein folding	Metabolism of protein	4.18	0.0606	NaN	ARFGEF2,CCT8,GNAQ,TBCD,TUBB2A,VBP1
Cellular response to heat stress	Cellular resp to stumuli	4.13	0.0594	NaN	BAG5,DNAJC2,HSPA12A,HSPH1,RAE1,VCP
Cristae formation	Orgenelle biogenesis and maintenance	4.11	0.121	NaN	ATP5F1B,ATP5F1D,DNAJC11,MTX2
PKR-mediated signaling	Immune system	3.68	0.0641	NaN	EIF2S3,MAPT,PPP2CB,PPP2R1A,TUBB2A
FOXO-mediated transcription	Transcription	3.54	0.158	NaN	AKT2,TXN,YWHAG
TP53 Regulates Metabolic Genes	Transcription	3.5	0.0588	NaN	AKT2,COX5A,RHEB,TXN,YWHAG
Citric acid cycle (TCA cycle)	Metabolism	3.4	0.143	NaN	IDH3A,IDH3B,OGDH
Opioid Signalling	Signal transduction	3.39	0.0556	NaN	GNAI3,GNAQ,PPP2CB,PPP2R1A,PRKAR2A
TCF dependent signaling in response to WNT	Signal transduction	3.32	0.0354	NaN	AKT2,CUL3,PPP2CB,PPP2R1A,PSMB7,PSMD9,RUVBL1
Mitochondrial protein degradation	Metabolism of protein	3.22	0.051	NaN	ATP5F1B,COX5A,IDH3A,NDUFS3,OGDH
Cell Cycle Checkpoints	Cell cycle	3.19	0.0294	NaN	DYNC1LI1,MCM5,PPP2CB,PPP2R1A,PSMB7,PSMD9,RFC3,YWHAG
Protein repair	Metabolism of protein	3.15	0.333	NaN	MSRA,TXN
ABC-family proteins mediated transport	Transport small moecule	3.12	0.0485	NaN	EIF2S3,ERLIN2,PSMB7,PSMD9,VCP
Mitotic Metaphase and Anaphase	Cell cycle	2.88	0.0297	NaN	DYNC1LI1,KPNB1,PPP2CB,PPP2R1A,PSMB7,PSMD9,TUBB2A
Translocation of SLC2A4 (GLUT4) to the plasma membrane	Vesicle-mediated transport	2.8	0.0556	NaN	AKT2,RAB10,TUBB2A,YWHAG
Synthesis of DNA	DNA replication	2.79	0.041	NaN	MCM5,POLD2,PSMB7,PSMD9,RFC3
Mitotic G1 phase and G1/S transition	Cell cycle	2.64	0.0379	NaN	AKT2,PPP2CB,PPP2R1A,PSMB7,PSMD9
Regulation of TP53 Expression and Degradation	Transcription	2.64	0.0789	NaN	AKT2,PPP2CB,PPP2R1A
Deubiquitination	Metabolism of protein	2.59	0.0264	NaN	ADRM1,PSMB7,PSMD9,RUVBL1,TOMM70,USP14,VCP
Mitotic G2-G2/M phases	Cell cycle	2.56	0.03	NaN	PPP2CB,PPP2R1A,PSMB7,PSMD9,TUBB2A,YWHAG
Cilium Assembly	Orgenelle biogenesis and maintenance	2.52	0.0294	NaN	ARL6,CCT8,PPP2R1A,TRIP11,TUBB2A,YWHAG
Mitotic Prometaphase	Cell cycle	2.51	0.0293	NaN	DYNC1LI1,PPP2CB,PPP2R1A,SMC4,TUBB2A,YWHAG
Telomere Maintenance	Cell cycle	2.47	0.0449	NaN	POLD2,PPP6R3,RFC3,RUVBL1
Aggrephagy	Autophagy	2.46	0.0682	NaN	DYNC1LI1,TUBB2A,VCP
Degradation of beta-catenin by the destruction complex	Signal transduction	2.43	0.044	NaN	PPP2CB,PPP2R1A,PSMB7,PSMD9
PTEN Regulation	Signal transduction	2.4	0.0333	NaN	AKT2,MTA1,PSMB7,PSMD9,RHEB
Nucleotide biosynthesis	Metabolism	2.39	0.143	NaN	ADSL,IMPDH2
KEAP1-NFE2L2 pathway	Cellular resp to stumuli	2.38	0.0329	NaN	AKT2,CUL3,PSMB7,PSMD9,VCP
DNA Damage Bypass	DNA repair	2.35	0.0625	NaN	POLD2,RFC3,VCP
Apoptotic execution phase	Programmed cell death	2.25	0.0577	NaN	KPNB1,MAPT,PTK2
Mitotic Prophase	Cell cycle	2.23	0.0385	NaN	PPP2CB,PPP2R1A,RAE1,SMC4
DNA Replication Pre-Initiation	DNA replication	2.23	0.0385	NaN	KPNB1,MCM5,PSMB7,PSMD9
Integration of energy metabolism	Metabolism	2.17	0.037	NaN	GNAQ,PPP2CB,PPP2R1A,PRKAR2A
HSP90 chaperone cycle for steroid hormone receptors in the presence of ligand	Cellular resp to stumuli	2.14	0.0526	NaN	DNAJA1,DYNC1LI1,TUBB2A
Hedgehog 'off' state	Signal transduction	2.09	0.0351	NaN	PRKAR2A,PSMB7,PSMD9,TUBB2A
Formation of ATP by chemiosmotic coupling	Metabolism	2.08	0.1	NaN	ATP5F1B,ATP5F1D
RAF/MAP kinase cascade	Signal transduction	2	0.0229	NaN	CUL3,PPP2CB,PPP2R1A,PSMB7,PSMD9,PTK2
Mitochondrial protein import	Proetin localization	1.98	0.0462	NaN	ATP5F1B,MTX2,TOMM70
Hedgehog ligand biogenesis	Signal transduction	1.98	0.0462	NaN	PSMB7,PSMD9,VCP
RAB geranylgeranylation	Metabolism of protein	1.98	0.0462	NaN	RAB10,RAB11B,RAB35
Clathrin-mediated endocytosis	Vesicle-mediated transport	1.9	0.031	NaN	ACTR2,HIP1,HIP1R,PACSIN1
COPII-mediated vesicle transport	Metabolism of protein	1.85	0.0411	NaN	PPP6R3,SEC16A,SEC31A
Extra-nuclear estrogen signaling	Signal transduction	1.82	0.04	NaN	AKT2,GNAI3,PTK2
MTOR signalling	Signal transduction	1.8	0.0714	NaN	AKT2,RHEB
RHO GTPases Activate Formins	Signal transduction	1.79	0.0286	NaN	DYNC1LI1,PPP2CB,PPP2R1A,TUBB2A
Interconversion of nucleotide di- and triphosphates	Metabolism	1.77	0.069	NaN	DUT,TXN
Activation of NMDA receptors and postsynaptic events	Neuronal system	1.67	0.0353	NaN	MAPT,PRKAR2A,TUBB2A
Signal amplification	Hemostasis	1.66	0.0606	NaN	GNAI3,GNAQ
MAPK targets/ Nuclear events mediated by MAP kinases	Immune system	1.66	0.0606	NaN	PPP2CB,PPP2R1A
Regulation of mRNA stability by proteins that bind AU-rich elements	Metabolism of RNA	1.62	0.0337	NaN	EXOSC1,PSMB7,PSMD9
RAB GEFs exchange GTP for GDP on RABs	Vesicle-mediated transport	1.61	0.0333	NaN	AKT2,RAB10,RAB35
MAPK6/MAPK4 signaling	Signal transduction	1.58	0.0326	NaN	PSMB7,PSMD9,SEPTIN7
Detoxification of Reactive Oxygen Species	Cellular resp to stumuli	1.57	0.0541	NaN	TXN,TXN2
Resolution of Abasic Sites (AP sites)	DNA repair	1.55	0.0526	NaN	POLD2,RFC3
Neddylation	Metabolism of protein	1.54	0.0203	NaN	CUL3,FBXO2,PSMB7,PSMD9,VCP
Signaling by FGFR3	Signal transduction	1.51	0.05	NaN	PPP2CB,PPP2R1A
S Phase	Cell cycle	1.49	0.03	NaN	AKT2,PSMB7,PSMD9
Signaling by FGFR4	Signal transduction	1.49	0.0488	NaN	PPP2CB,PPP2R1A
Formation of xylulose-5-phosphate	Metabolism	1.47	0.2	NaN	SORD
Regulation of endogenous retroelements	Transcription	1.45	0.0288	NaN	MTA1,MTREX,SMARCC2
TBC/RABGAPs	Vesicle-mediated transport	1.43	0.0455	NaN	RAB11B,RAB35
RHO GTPase cycle	Signal transduction	1.43	0.0156	NaN	ACTN1,CKAP4,CKB,CUL3,NDUFS3,RNF20,VCP
Nucleotide Excision Repair	DNA repair	1.4	0.0275	NaN	POLD2,RFC3,RUVBL1
Pyruvate metabolism	Metabolism	1.34	0.0408	NaN	GID8,PDHX
Fructose metabolism	Metabolism	1.32	0.143	NaN	SORD
